# Supplementary material for: Epidemiology of placenta previa accreta: a systematic review and meta-analysis
Source: PubMed Central journal article supplement — BMJ Open. 2019 Nov 12;9(11):e031193. doi: 10.1136/bmjopen-2019-031193 (PMC6858111; doi:10.1136/bmjopen-2019-031193), 2019-11-12
Supplement: bmjopen-2019-031193.draft_revisions.pdf [file bmjopen-2019-031193.draft_revisions.pdf]

# BMJ Open

BMJ Open is committed to open peer review. As part of this commitment we make the peer review history of every article we publish publicly available.

When an article is published we post the peer reviewers' comments and the authors' responses online. We also post the versions of the paper that were used during peer review. These are the versions that the peer review comments apply to.

The versions of the paper that follow are the versions that were submitted during the peer review process. They are not the versions of record or the final published versions. They should not be cited or distributed as the published version of this manuscript.

BMJ Open is an open access journal and the full, final, typeset and author-corrected version of record of the manuscript is available on our site with no access controls, subscription charges or pay-per-view fees (<http://bmjopen.bmj.com>).

If you have any questions on BMJ Open's open peer review process please email [info.bmjopen@bmj.com](mailto:info.bmjopen@bmj.com)

# BMJ Open

## Epidemiology of Placenta Previa Accreta: A Systematic Review and Meta-analysis

|                               |                                                                                                                                                                                                                                                                                                                                                                                           |
|-------------------------------|-------------------------------------------------------------------------------------------------------------------------------------------------------------------------------------------------------------------------------------------------------------------------------------------------------------------------------------------------------------------------------------------|
| Journal:                      | <i>BMJ Open</i>                                                                                                                                                                                                                                                                                                                                                                           |
| Manuscript ID                 | bmjopen-2019-031193                                                                                                                                                                                                                                                                                                                                                                       |
| Article Type:                 | Research                                                                                                                                                                                                                                                                                                                                                                                  |
| Date Submitted by the Author: | 21-Apr-2019                                                                                                                                                                                                                                                                                                                                                                               |
| Complete List of Authors:     | Jauniaux , E; UCL, EGA Institute for Women Health<br>Grønbeck, Lene; University of Copenhagen, Department of Obstetrics, Rigshospitalet<br>Bunce, Catey; kings College london, Primary Care and Public Health Sciences<br>Langhoff-Roos, Jens; Rigshospitalet Infektionsmedicinsk Klinik,<br>Collins, Sally; University of Oxford, Nuffield Department of Women's and Reproductive Health |
| Keywords:                     | Placenta previa accreta, Prevalence, Incidence, Low-lying placenta, Placenta previa                                                                                                                                                                                                                                                                                                       |
|                               |                                                                                                                                                                                                                                                                                                                                                                                           |

SCHOLARONE™  
Manuscripts

# Epidemiology of Placenta Previa Accreta: A Systematic Review and Meta-analysis

Eric Jauniaux,<sup>1</sup> Lene Grønbeck,<sup>2</sup> Catey Bunce,<sup>3</sup> Jens Langhoff-Roos,<sup>2</sup> Sally L Collins<sup>4</sup>

## Author affiliations

1. EGA Institute for Women's Health, Faculty of Population Health Sciences, University College London (UCL), London, UK.
2. Department of Obstetrics, Rigshospitalet, University of Copenhagen, Denmark.
3. Statistic unit, School of Population Health and Environmental Sciences, Kings College London, London UK.
4. Nuffield Department of Women's and Reproductive Health, University of Oxford, UK

***The authors report no conflict of interest.***

**PPI statement:** We did not involve patients or the public in our work.

**No funding was obtained for this study.** "CB's post is part funded/supported by the National Institute for Health Research (NIHR) Biomedical Research Centre based at Guy's and St Thomas' NHS Foundation Trust and King's College London. The views expressed are those of the author(s) and not necessarily those of the NHS, the NIHR or the Department of Health." <http://orcid.org/0000-0002-0310-2518>

**Key Words:** Placenta accreta spectrum; prevalence; incidence; low-lying placenta; placenta previa.

**Word counts:** Abstract= 292 ; Main text= 3685.

**Corresponding author:** *Professor Eric Jauniaux,*  
*EGA Institute for Women's Health, University College London,*  
*86-96 Chenies Mews, London WC1E 6HX, UK.*  
Telephone numbers: +44/207/3908113  
Fax: +44/207/3908115  
E-mail: [e.jauniaux@ucl.ac.uk](mailto:e.jauniaux@ucl.ac.uk)

## ABSTRACT

**Objective** To estimate the prevalence and incidence of placenta previa complicated by placenta accreta spectrum (PAS) and to examine the different criteria being used for the diagnosis.

**Design** Systematic review and meta-analysis.

**Methods** PubMed, Google Scholar, clinicalTrials.gov and MEDLINE were searched between August 1982 and September 2018 for studies reporting on placenta previa and placenta previa with PAS diagnosed in a defined obstetric population. Two independent reviewers performed the data extraction using a predefined protocol and assessed the risk of bias using the Newcastle-Ottawa scale for observational studies, with difference agreed by consensus. The primary outcomes were overall prevalence of placenta previa, incidence of PAS according to the type of placenta previa and the reported clinical outcomes including number of peri-partum hysterectomies and direct maternal mortality. The secondary outcomes included the criteria used for the prenatal ultrasound diagnosis of placenta previa and the criteria used to diagnose and grade PAS at birth.

**Results** A total of 258 articles were reviewed and 13 retrospective and 7 prospective studies were included in the analysis which reported on 587 women with placenta previa and PAS. The median prevalence of placenta previa was 0.56% (IQR 0.39;1.24) whereas the median prevalence of placenta previa with PAS was 0.07% (IQR 0.05;0.16). The incidence of PAS in women with a placenta previa was 11.10% (IQR 7.65;17.35). The meta-analysis indicated a significant level of overall heterogeneity between study estimates for the prevalence of placenta previa ( $P<.001$ ), the prevalence

1  
2  
3 of placenta previa with PAS and the incidence of PAS in the placenta previa cohort. The  
4  
5 high heterogeneity between studies emphasizing the need to implement standardized  
6  
7 protocols for the diagnoses of both placenta previa and PAS, including the type of  
8  
9 placenta previa on ultrasound imaging and grading of villous invasiveness at delivery.  
10  
11  
12  
13  
14

### 15 **Strengths and limitations of this study**

- 16  
17 ⇒ This is the first study providing a comprehensive evaluation of the prevalence of  
18 placenta previa complicated by PAS and the incidence of PAS in women  
19 presenting with a placenta previa.  
20  
21 ⇒ Large amounts of heterogeneity for the prevalence and incidence of placenta  
22 previa accreta highlight the effect of the absence of standardisation in reporting  
23 on both placenta previa and placenta previa accreta in many cohort studies.  
24  
25 ⇒ Thirteen out of 20 studies included in the analysis were retrospective with  
26 considerable variation between studies in both the prenatal diagnosis of placenta  
27 previa and the confirmation of the diagnosis of accreta placentation at births.  
28  
29 ⇒ The lack of accurate data on the depth of accreta placentation in most studies  
30 limits the evaluation of differences in outcome between the adherent and  
31 invasive accreta previa placentation.  
32  
33  
34  
35  
36  
37  
38  
39  
40  
41  
42  
43  
44  
45  
46  
47  
48  
49  
50  
51  
52  
53  
54  
55  
56  
57  
58  
59  
60

## INTRODUCTION

Placenta accreta is a pathological condition of placentation associated with a high risk of massive obstetric hemorrhage during delivery. Initially described in 1937 by Irving and Hertig<sup>1</sup> as the abnormal adherence of the placenta to the myometrium due to the partial or complete absence of decidua basalis, it was subsequently redefined by Lukes et al<sup>2</sup> as a spectrum of abnormally adherent and invasive placentation disorders. Placenta accreta is now graded according to the depth of the villous penetration into the uterine wall starting with the abnormally adherent placenta or creta, where the villi attach directly to the surface of the myometrium without invading it, and extending to the invasive grades of placenta increta, where the villi penetrate deeply into the myometrium up to the uterine serosa, and placenta percreta, where the invasive villous tissue penetrates through the uterine serosa often entering the surrounding pelvic tissues.<sup>5</sup> The different grades of the placenta accreta spectrum (PAS) can co-exist in the same specimens and can be focal (just a small area of the placental bed) or extensive (including much of the placental bed).<sup>2</sup>

Over the last two decades, a growing body of epidemiology research has identified the effect of the rapid increase in caesarean delivery rates on the risks of PAS.<sup>6-10</sup> The main additional risk factor after a previous caesarean delivery is placenta previa. A large multicentric U.S. cohort study noted that for women presenting with placenta previa and prior caesarean delivery, the risk of PAS was 3%, 11%, 40%, 61%, and 67% for first, second, third, fourth, and fifth or more cesarean deliveries, respectively.<sup>7</sup> A national case-control study using the UK Obstetric Surveillance System found that the incidence of PAS increases from 1.7 per 10,000 births overall to 577 per

1  
2  
3 10,000 births in women with both a previous caesarean delivery and placenta previa.<sup>8</sup>  
4

5 Both abnormal adherence and invasion of villous tissue into the myometrium  
6 results in failure of the placenta to separate spontaneously from the uterine wall at  
7 delivery.<sup>2-4</sup> When unsuspected at the time of delivery, attempts to manually remove  
8 accreta villous tissue typically provoke rapid bleeding from the utero-placental  
9 circulation.<sup>5,11</sup> In invasive cases, this can lead to massive obstetric hemorrhage due to  
10 the disruption of the deep uterine vasculature of the increta or percreta area.<sup>4,5</sup> Not  
11 surprisingly, prenatal diagnosis of PAS has been shown to decrease maternal morbidity  
12 and mortality, and has thus become essential in improving its management.<sup>12,13</sup> Tabsh et  
13 al were the first in 1982 to report on the prenatal ultrasound diagnosis of a case of  
14 placenta increta.<sup>14</sup> A recent systematic review and meta-analysis of prenatal ultrasound  
15 diagnosis of placenta previa with PAS in women with a history of caesarean delivery has  
16 found that the overall diagnostic accuracy of ultrasound in specialist units is in 90.9%.<sup>15</sup>  
17 However, even in countries with well-established screening programs for fetal anomalies,  
18 over half the cases of PAS are not diagnosed before delivery.<sup>8,10</sup>  
19  
20  
21  
22  
23  
24  
25  
26  
27  
28  
29  
30  
31  
32  
33  
34  
35  
36  
37

38 Accreta placentation and in particular its invasive forms are impacting maternal  
39 health outcomes globally and its prevalence is likely to increase. Women with a history  
40 of previous caesarean delivery presenting with placenta previa accreta in an ongoing  
41 pregnancy are now the cohort of obstetric patients with the highest risk of delivery  
42 complications<sup>16</sup>, however, their epidemiology has not been comprehensively reviewed  
43 yet. Health provision for the development of maternity centres with specialist teams,  
44 equipment, drugs, blood bank and intensive care infrastructure to safely manage  
45 women presenting with placenta previa accreta requires an accurate evaluation of its  
46  
47  
48  
49  
50  
51  
52  
53  
54  
55  
56  
57  
58  
59  
60

1  
2  
3 epidemiology. The objective of this meta-analysis is to review the epidemiology of  
4 women presenting with placenta previa and to examine the different diagnostic criteria  
5 used by the authors of cohort studies to diagnose placenta previa prenatally and PAS  
6 and confirmed the diagnosis of PAS at birth.  
7  
8  
9  
10  
11  
12  
13

## 14 **MATERIALS AND METHODS**

15  
16  
17 A systematic review was performed for articles providing data on prevalence and  
18 incidence of PAS in women presenting with a placenta previa where the populations  
19 sampled was defined. Embase, PubMed, Google Scholar, clinicalTrials.gov and  
20 MEDLINE were searched for studies published between the first prenatal ultrasound  
21 description of placenta accreta in August 1982 by Tabsh<sup>14</sup> et al and September 2018.  
22  
23 The search protocol was designed a priori and registered on PROSPERO  
24 (CRD42017068589) (<http://www.crd.york.ac.uk/PROSPERO>). The overall search  
25 strategy was inclusive of MeSH headings for “placenta accreta, placenta increta,  
26 placenta percreta, abnormally invasive placenta, morbidly adherent placenta, low-lying  
27 placenta, minor placenta previa, major placenta previa” which were combined with  
28 terms including “prevalence, incidence, obstetric hysterectomy and caesarean  
29 hysterectomy”. Title, abstracts and full-text were independently assessed by the authors  
30 for content, data extraction and analysis. Additional relevant studies were identified from  
31 reference lists of reviews and editorials and by hand-searching key journals and  
32 websites. All search results were combined in a reference database. Duplicates were  
33 removed by hand. The search was limited to articles published in English.  
34  
35  
36  
37  
38  
39  
40  
41  
42  
43  
44  
45  
46  
47  
48  
49  
50  
51  
52  
53  
54  
55  
56  
57  
58  
59  
60



1  
2  
3 Two independent authors (EJ and LG) selected studies in two stages. The  
4  
5 abstracts of all potentially relevant papers were individually examined for suitability.  
6  
7 Papers were only ruled out at this stage if they obviously did not meet the inclusion  
8  
9 criteria. The remainder were obtained in full text and were independently assessed  
10  
11 for content, data extraction and analysis. Disagreements between the two original  
12  
13 reviewers were resolved by discussion with the third reviewer (JLR). Articles were  
14  
15 excluded if; they were published before August 1982, contained no data on the study  
16  
17 population such as the overall pregnancies, births and/or deliveries numbers, were case  
18  
19 reports or were overlapping.  
20  
21  
22  
23

24 Study characteristics were extracted using a predesigned data extraction  
25  
26 protocol including: author institution, year of publication, country of origin, study period,  
27  
28 study type (retrospective, single institution, multiple institutions), total number of cases  
29  
30 in the study population, type of placenta previa, diagnosis of PAS at birth. The need to  
31  
32 perform a peripartum hysterectomy, direct maternal mortality and prior surgical history  
33  
34 were also recorded. The reference standard for differential diagnosis between minor  
35  
36 and major placenta previa was the evaluation of the placental position inside the uterine  
37  
38 cavity on transvaginal ultrasound with relation to the internal cervical os. For the  
39  
40 diagnosis of accreta placentation, we referred to the clinical grading based on surgical  
41  
42 findings at delivery as previously described<sup>17</sup> and to histopathologic findings when a  
43  
44 caesarean hysterectomy was performed i.e. placental villi directly attached to the  
45  
46 myometrium without interposing decidua or invading the uterine wall.  
47  
48  
49  
50

51 Two independent reviewers (EJ and LG) undertook the quality assessment with  
52  
53 difference agreed by consensus. The Newcastle-Ottawa scale for observational studies  
54  
55  
56  
57  
58  
59  
60

1  
2  
3 was used to establish the risk of bias in selection, comparability, and outcome  
4 assessment.<sup>18</sup> Studies that scored four stars for selection, two stars for comparability,  
5 and three stars for ascertainment of the outcome were regarded to have a low risk of  
6 bias. Studies with two or three stars for selection, one for comparability, and two for  
7 outcome ascertainment were considered to have a medium risk of bias. We deemed  
8 any study with a score of one for selection or outcome ascertainment, or zero for any of  
9 the three domains, to have a high risk of bias. No study was excluded based on the risk  
10 of bias assessment.  
11  
12  
13  
14  
15  
16  
17  
18  
19  
20

21 Analyses were conducted using STATA software (version 15; StataCorp, College  
22 Station, TX). Standard Kurtosis analysis indicated that some values were not normally  
23 distributed and are therefore presented as median and interquartile range (IQR). A  
24 random effects model was used to combine the studies while incorporating variations  
25 among studies unless there were three or less studies contributing to the meta-analysis  
26 in which case a fixed effect model was used. Statistical heterogeneity was assessed  
27 with the Cochran's Q-test and the  $I^2$  statistic (the proportion of variation in study  
28 estimates because of heterogeneity rather than sampling error). Forest plots are  
29 presented to graphically summarize the study results and the pooled results. A test for  
30 heterogeneity between sub-groups (i.e. study types) was conducted.  
31  
32  
33  
34  
35  
36  
37  
38  
39  
40  
41  
42  
43  
44  
45  
46

## 47 **RESULTS**

48  
49 The initial search provided 256 records with cross-referencing providing an additional  
50 two studies, making a total of 258 potentially relevant articles. After exclusion of  
51 duplicates and the two which were not available (Figure 1), 220 remained. On screening  
52  
53  
54  
55  
56  
57  
58  
59  
60

1  
2  
3 the titles and abstracts, a further 162 were excluded as the reported outcomes were not  
4 relevant, leaving 58 studies which were obtained for full text review. An additional 38  
5 articles were excluded after full review including letters (n=16), narrative reviews (n= 10)  
6 commentaries (n= 9), conference proceedings (n= 2) and duplication of data in another  
7 publication (n=1).  
8  
9  
10  
11  
12  
13

14 The quality of the studies is shown in Figure 2. Eighteen of the 20 included  
15 studies included in the final review had low or medium risk of bias for sample selection,  
16 nine had low risk of bias for outcome assessment, and six had low risk of bias for  
17 comparability of cohorts. Overall, 18 studies had low or medium risk of bias.  
18  
19  
20  
21  
22  
23

24 Table 1 presents the study characteristics and epidemiology data of the 20  
25 studies. There were 13 retrospective<sup>19,20,23,25-27,29-31,33-35,38</sup> and 7  
26 prospective<sup>21,22,24,28,32,36,37</sup> studies including a total of 1,197,296 births and 23,864  
27 pregnancies. There were 15 studies from a single institution<sup>19-24,27-30,32-34,37,38</sup> and five  
28 from multiple institutions<sup>25,31</sup> or a geographical region.<sup>26,35,36</sup> These studies included 587  
29 women with placenta previa complicated by PAS out of 6,628 cases of placenta previa.  
30 The median prevalence of placenta previa in the 20 studies was 0.56% (IQR 0.39;1.24)  
31 whereas the median prevalence of placenta previa with PAS was 0.07% (IQR  
32 0.05;0.16). The median incidence of PAS in women with a placenta previa was 11.10%  
33 (IQR 7.65;17.35).  
34  
35  
36  
37  
38  
39  
40  
41  
42  
43  
44  
45

46 All authors except two<sup>29,33</sup> reported on the criteria used for the prenatal  
47 ultrasound diagnosis of placenta previa. Six studies<sup>24,26,30,32,37,38</sup> only included major  
48 placenta previa in their cohort as defined as the placenta completely covering or  
49 partially covering the internal os of the cervix. The others included both major and minor  
50  
51  
52  
53  
54  
55  
56  
57  
58  
59  
60

1  
2  
3 placenta previa. The definition of minor placenta previa varied with two studies<sup>31,36</sup> using  
4 the placental edge being <2cm from the internal os, two studies using < 3cm<sup>22,23</sup> and  
5 one study using <3 cm or <5 cm if associated with abnormal fetal presentation.<sup>21</sup> The  
6 gestational age at confirmation of the prenatal diagnosis of placenta previa was  
7 reported in six studies<sup>22,23,24,28,32,37</sup> and ranged between 20 weeks and 34 weeks and in  
8 one study the diagnosis of placenta previa was confirmed at birth when the placenta  
9 was found to be inserted in the lower segment.<sup>19</sup>

10  
11  
12  
13  
14  
15  
16  
17  
18  
19 The ultrasound diagnostic signs for PAS were reported in six studies<sup>24,28,30,32,36,37</sup>  
20 with two studies also reporting on the use of magnetic resonance imaging.<sup>29,38</sup> The  
21 clinical criteria used for the diagnosis of PAS at birth were reported by nine  
22 studies<sup>19,20,23,27,28,30,33,36,37</sup> and included a difficult delivery of the placenta without easy  
23 separation uterine wall or requiring a “piecemeal removal” associated with heavy  
24 bleeding and excessive bleeding from the placental bed after placental delivery. One  
25 author described the presence of invasive villous tissue at delivery<sup>27</sup> and one the need  
26 to suture the placental bed.<sup>23</sup> None of the other authors reported on the gross  
27 appearance of the uterus or surgical findings at the time of caesarean delivery. In 12  
28 studies<sup>19,23,24,27-31,33,34,36,37</sup> the prenatal and/or clinical diagnosis was confirmed by  
29 histopathological examination with detailed description of the microscopic criterion only  
30 reported in six<sup>19,27,28,30,31,37</sup>. Detailed histopathological findings on the depth of villous  
31 invasiveness were reported in nine studies<sup>24,27-29,31,33,34,36,37</sup> out of the 20 studies. These  
32 included 283 cases of placenta previa accreta graded for 171 (60.4%) as placenta creta  
33 (adherent), 74 (26.2%) as placenta increta and 38 (13.4%) as placenta percreta.  
34  
35  
36  
37  
38  
39  
40  
41  
42  
43  
44  
45  
46  
47  
48  
49  
50  
51  
52  
53  
54  
55  
56  
57  
58  
59  
60

1  
2  
3 All authors but two<sup>22,23</sup> reported on prior surgical history including caesarean  
4 section<sup>19-21,24-38</sup>, uterine curettage<sup>28,30-32,34,37,38</sup> and myomectomy.<sup>28,36,37</sup> Data on surgical  
5 management was available in 14 out of the 20 studies<sup>19,20,23,27-31,33-38</sup> with 314 out of 441  
6 women presenting with a placenta previa complicated by PAS. The median peri-partum  
7 hysterectomy rate of 69.2% (IQR 50.0;84.0). Data on maternal mortality were available  
8 in 13 studies<sup>19-21,23,25,27-30,32,35,37,38</sup> and PAS accounted for 5 maternal deaths<sup>19,20,25,29,30</sup>  
9 out of 387 (1.3%) cases of placenta previa with PAS.

10  
11 The meta-analysis indicated statistically significant ( $P < .001$ ) level of overall  
12 heterogeneity between study estimates for the prevalence of placenta previa (Figure 3),  
13 the prevalence of placenta previa with PAS (Figure 4) and the incidence of PAS in the  
14 placenta previa cohort (Figure 5). There was strong evidence of inconsistency between  
15 study types with  $I^2$  values greater 85%. The difference in heterogeneity between  
16 prospective versus retrospective studies was not statistically significantly ( $P = .839$ )  
17 different (Figure 3) whereas it was significant ( $P = .014$ ) for the prevalence of placenta  
18 previa accreta (Figure 4). Adjusting for type of study (prospective versus retrospective)  
19 did not reduce inconsistency between studies. The in-between placenta previa major  
20 only versus minor and major placental previa was not significant ( $P = .067$ ) for the  
21 incidence of PAS in patient with placenta previa (Figure 5).

## 22 23 24 25 26 27 28 29 30 31 32 33 34 35 36 37 38 39 40 41 42 43 44 45 46 47 **DISCUSSION**

48  
49 This study provides a comprehensive evaluation of the prevalence of placenta previa  
50 complicated by PAS and the incidence of PAS in women presenting with a placenta  
51 previa. Women with a prior history of caesarean delivery presenting with a low-  
52  
53  
54  
55  
56  
57  
58  
59  
60

1  
2  
3 lying/placenta previa represent more than 90% of the cases of PAS.<sup>8,10,16</sup> The meta-  
4  
5 analysis indicates high heterogeneity for both the prenatal diagnosis of placenta previa  
6  
7 and for the confirmation of the diagnosis of PAS at delivery. These findings highlight the  
8  
9 need to use international standardized clinical protocols for the screening and  
10  
11 management of this complex obstetric condition. The current situation limits the capacity  
12  
13 building of healthcare providers on improvements in training, implementation of  
14  
15 guidelines and changes in clinical practice behaviour.  
16  
17  
18

19 Defining the position of the placenta inside the uterus was one of the first aims of  
20  
21 obstetric ultrasound examination.<sup>39,40</sup> Following the development of real-time ultrasound  
22  
23 imaging, placental location became an integral part of the mid-pregnancy ultrasound  
24  
25 examination.<sup>41</sup> Placenta previa was initially described with transabdominal scan as a  
26  
27 placenta developing within the lower uterine segment and classified according to the  
28  
29 relationship and/or the distance between the lower placental edge and the internal os of  
30  
31 the uterine cervix i.e. minor placenta previa when lower edge is inside the lower uterine  
32  
33 segment down to the internal os and major placenta previa when the placenta covers the  
34  
35 cervix. Minor placenta previa can be further subdivided into low-lying placenta when the  
36  
37 lower edge does not reach the internal os and marginal placenta previa when it does.  
38  
39 Major placenta previa can also be described as partial or complete depending on the  
40  
41 amount of placental tissue covering the cervix. The use of transvaginal scanning has  
42  
43 allowed for a more precise evaluation of the distance between the placental edge and the  
44  
45 internal os<sup>42,43</sup> but as demonstrated in our meta-analysis, the reporting of the ultrasound  
46  
47 criteria used for the diagnosis of placenta previa has been heterogenous. In addition, we  
48  
49 found also wide variation in the gestational age at diagnosis. The timing of the  
50  
51  
52  
53  
54  
55  
56  
57  
58  
59  
60

1  
2  
3 confirmation of the diagnosis has a direct impact on epidemiology data as up to 70% of  
4 minor placenta previa at 20-23 weeks of gestation will resolve by 32-35 weeks.<sup>44,45</sup> An  
5 expert panel of the American Institute of Ultrasound in Medicine<sup>46</sup> has recently  
6 recommended ceasing the use of the terms 'partial' and 'marginal' and using the term  
7 'placenta previa' only when the placenta lies directly over the internal os. The placenta  
8 should be reported as 'low lying' when the placental edge is less than 2 cm from the  
9 internal os and as normal when the placental edge is more than 2 cm from the internal  
10 os. The findings of our meta-analysis highlight the need for the use of such a classification  
11 in further studies.  
12  
13  
14  
15  
16  
17  
18  
19  
20  
21  
22  
23

24 Only six of the 20 studies included in the present meta-analysis provided data on  
25 the prenatal ultrasound diagnosis of PAS in patients with placenta previa. We included  
26 in the systematic review all studies published since the first ultrasound description of  
27 PAS by Tabsh et al in 1982.<sup>14</sup> We found no studies between 1982 and 1993 (Table 1)  
28 which corresponds to the time when high-resolution grey-scale ultrasound imaging  
29 became widely available. Colour-Doppler imaging was introduced for the diagnosis of  
30 PAS in 1992<sup>47</sup>, however the sensitivity and specificity of grey-scale imaging alone in  
31 diagnosing for placenta previa accreta are high when performed by experience  
32 operators.<sup>15</sup> These findings indicate that the prenatal diagnosis of PAS can be  
33 performed using standard ultrasound equipment. Unlike placenta previa which is  
34 routinely screened for at the time of the fetal anomaly scan, PAS is currently not  
35 screened for and the data available on the prenatal diagnosis of the condition come  
36 exclusively from specialist centres.<sup>16</sup> In these centres, the diagnostic accuracy of  
37 ultrasound imaging is over 90%, but similarly, to placenta previa, the description of the  
38  
39  
40  
41  
42  
43  
44  
45  
46  
47  
48  
49  
50  
51  
52  
53  
54  
55  
56  
57  
58  
59  
60

1  
2  
3 ultrasound signs used for the diagnosis of PAS, over the last two decades, has also  
4  
5 been highly variable.<sup>47,48</sup> The European Working Group on Abnormally Invasive  
6  
7 Placenta and the Abnormally Invasive Placenta international expert group have recently  
8  
9 proposed a standardised description of ultrasound signs used for the prenatal diagnosis  
10  
11 and a proforma protocol for the ultrasound assessment of PAS.<sup>49,50</sup> The use of these  
12  
13 protocols in prospective studies should also facilitate the screening of patients at high  
14  
15 risk of PAS and in particular those with multiple prior caesarean deliveries presenting  
16  
17 with a low-lying or placenta previa.<sup>51</sup>  
18  
19  
20

21  
22 We found significant heterogeneity in the qualitative definition and diagnosis of  
23  
24 PAS at birth among the nine studies that provided a description of the clinical  
25  
26 findings.<sup>19,20,23,27,28,30,33,36,37</sup> Only one of these studies described the invasive  
27  
28 appearance of placental tissue at delivery<sup>27</sup> whereas the others reported a difficult  
29  
30 delivery of the placenta without easy separation from the uterine wall or requiring a  
31  
32 “piecemeal removal” associated with heavy bleeding as diagnostic of PAS. These  
33  
34 clinical criteria were first described by Irving and Hertig<sup>4</sup> in 1937 who did not have  
35  
36 invasive cases in their cohort and thus their definition only applies to abnormally  
37  
38 adherent placenta and not to placenta increta or percreta. This definition also fails to  
39  
40 clearly differentiate between abnormal adherence and placental retention as both  
41  
42 present with similar clinical symptoms and etiology<sup>52</sup> leading to possible over diagnosis  
43  
44 of placenta previa accreta. Similarly, the finding of excessive bleeding from the  
45  
46 placental bed after delivery of the placenta is a common complication of non-accreta  
47  
48 placenta previa due to the implantation of the placenta in the lower uterine segment  
49  
50 which contains less muscular fibers than the upper segment and is often thinner and  
51  
52  
53  
54  
55  
56  
57  
58  
59  
60



1  
2  
3 dehiscent after multiple caesarean deliveries.  
4

5 Detailed histopathologic reports can only be obtained in those patients who have  
6 a hysterectomy or a partial myometrial resection and thus in many studies there is not  
7 histopathologic confirmation of the clinical diagnosis. The main histological diagnostic  
8 criteria of accreta placentation i.e. absence of decidua between the tip of anchoring villi  
9 and the superficial myometrium, is found with increasing incidence with advancing  
10 gestation in pregnancies with no clinical evidence of PAS.<sup>5</sup> Thus the combination of  
11 clinical criteria that do not differentiate between placenta retention and adherent accreta  
12 and the use of non-diagnostic criteria of villous invasiveness may result in the over-  
13 diagnosis of the adherent grade of PAS, in particular in those studies reporting a low  
14 rate of caesarean hysterectomy.<sup>28,36</sup> Overall, this can explain the wide range in the  
15 prevalence (0.04 to 0.42%) of placenta previa with PAS and incidence (2.9 to 71.6%) of  
16 PAS in women presenting with placenta previa (Figures 3 and 4).  
17  
18  
19  
20  
21  
22  
23  
24  
25  
26  
27  
28  
29  
30  
31  
32

33 Overall, management strategies and outcomes will vary depending on the  
34 accuracy of prenatal diagnosis, local surgical expertise and more recently access to a  
35 centre of excellence with multidisciplinary team approach.<sup>53,54</sup> In cases of high suspicion  
36 of PAS during cesarean delivery, 60-70% of obstetricians gynecologists proceed with a  
37 peripartum hysterectomy.<sup>55,56</sup> By contrast with a conservative management approach,  
38 radical surgery is often considered to be safer, in particular in cases of invasive  
39 placentation.<sup>57</sup> The association between a placenta previa and a PAS increases the  
40 risks of both maternal morbidity and mortality. In the present study we found that a  
41 caesarean hysterectomy was the primary management option in around 70% of the  
42 patients presenting with a placenta previa and PAS. The inter-study range was wide  
43  
44  
45  
46  
47  
48  
49  
50  
51  
52  
53  
54  
55  
56  
57  
58  
59  
60

1  
2  
3 with four studies<sup>19,21,29,37</sup> reporting peripartum hysterectomy rates < 50%, five<sup>28,31,32,34,36</sup>  
4  
5 had rates between 50-99% and four<sup>22,30,35,38</sup> had rates of 100%. This may be due to  
6  
7 difference in study protocols, local expertise and the impact of prenatal diagnosis on  
8  
9 management strategies but also as suggested by our analysis to difference in the rates  
10  
11 of the different grades of PAS and the accuracy of clinical diagnosis at birth and detailed  
12  
13 histopathologic examination confirming the diagnosis.  
14  
15

16  
17 The main limitations of this review are the quality of the published data. Thirteen  
18  
19 out of 20 studies included in the analysis studies were retrospective and there was wide  
20  
21 variation in the use of different ultrasound criteria for the prenatal diagnosis of placenta  
22  
23 previa, in the clinical diagnosis of PAS at delivery and in the authors providing detailed  
24  
25 histopathology data to confirm the clinical diagnosis. This is hampering the analysis of  
26  
27 the secondary outcome in particular the incidence of major hemorrhage at delivery and  
28  
29 the need and amount of blood transfusion but also the choice in management protocols  
30  
31 and in particular the use of conservative management procedures. We would not,  
32  
33 therefore, recommend the use of the pooled estimates beyond as a driver towards the  
34  
35 development of standardized diagnostic protocols.  
36  
37  
38  
39

40 The prevalence of PAS in the general population of women giving birth varies  
41  
42 widely.<sup>8,10,58,59</sup> This may be due to several factors including national and local caesarean  
43  
44 delivery rates, expertise in diagnosing the condition antenatally and access to perinatal  
45  
46 pathologist to confirm the diagnosis at birth. There is a need for further prospective multi-  
47  
48 centre studies with participatory methodologies involving local service providers and  
49  
50 facility management to accurately evaluate the consequences of high caesarean sections  
51  
52 rates on maternal health within a particular population. Within this context, accurate  
53  
54  
55  
56  
57  
58  
59  
60

1  
2  
3 epidemiologic data on PAS disorders are essential in planning screening programs and  
4  
5 in making provision for the development of centres of excellence for the management of  
6  
7 this increasingly common complex obstetric condition. Whilst the concept of core outcome  
8  
9 measures within clinical trials is now well recognised and championed, greater efforts to  
10  
11 disseminate this approach in epidemiological research to facilitate global estimation and  
12  
13 recognition of problems emerging on a global scale. Our study supports implementation,  
14  
15 in both clinical practice and in reporting data on placenta previa accreta in the medical  
16  
17 literature, of standardized protocols for prenatal diagnosis of both placenta previa and  
18  
19 PAS, for the clinical diagnosis of PAS at birth and for the histopathologic confirmation  
20  
21 examination.  
22  
23  
24  
25  
26  
27  
28  
29  
30  
31  
32  
33  
34  
35  
36  
37  
38  
39  
40  
41  
42  
43  
44  
45  
46  
47  
48  
49  
50  
51  
52  
53  
54  
55  
56  
57  
58  
59  
60

## REFERENCES

1. Irving C, Hertig AT. A study of placenta accreta. *Surgery, Gynecol Obstet* 1937;64:178-200.
2. Luke RK, Sharpe JW, Greene RR. Placenta accreta: The adherent or invasive placenta. *Am J Obstet Gynecol* 1966;95:660–8.
3. Jauniaux E, Jurkovic D. Placenta accreta: pathogenesis of a 20th century iatrogenic uterine disease. *Placenta*. 2012;33:244-51.
4. Jauniaux E, Bhide A, Burton GJ. Pathophysiology of accreta. In: Silver, R. ed. *Placenta accreta syndrome*. Portland: CRC Press; 2017:13–28.
5. Jauniaux E, Collins SL, Burton GJ. Placenta accreta spectrum: Pathophysiology and evidence-based anatomy for prenatal ultrasound imaging. *Am J Obstet Gynecol*. 2018;218:75-87.
6. Wu S, Kocherginsky M, Hibbard JU. Abnormal placentation: twenty-year analysis. *Am J Obstet Gynecol*. 2005;192:1458–61.
7. Silver RM, Landon MB, Rouse DJ, Leveno KJ, Spong CY, Thom EA, et al.; National Institute of Child Health and Human Development Maternal-Fetal Medicine Units Network. Maternal morbidity associated with multiple repeat cesarean deliveries. *Obstet Gynecol* 2006;107:1226–32.
8. Fitzpatrick KE, Sellers S, Spark P, Kurinczuk JJ, Brocklehurst P, Knight M. Incidence and risk factors for placenta accreta/increta/percreta in the UK: a national case-control study. *PLoS One*. 2012;7:e52893.

- 1  
2  
3 9. Bowman ZS, Eller AG, Bardsley TR, Greene T, Varner MW, Silver RM. Risk  
4  
5 Factors for Placenta Accreta: A Large Prospective Cohort. *Am J Perinatol*.  
6  
7 2014;31:799-804.  
8  
9
- 10 10. Thurn L, Lindqvist PG, Jakobsson M, Colmorn LB, Klungsoyr K, Bjarnadóttir RI,  
11  
12 et al. Abnormally invasive placenta-prevalence, risk factors and antenatal  
13  
14 suspicion: results from a large population-based pregnancy cohort study in the  
15  
16 Nordic countries. *BJOG*. 2016;123:1348-55.  
17  
18
- 19 11. Silver RM, Branch DW. Placenta Accreta Spectrum. *N Engl J Med*.  
20  
21 2018;378:1529-36.  
22  
23
- 24 12. Chantraine F, Braun T, Gonser M, Henrich W, Tutschek B. Prenatal diagnosis of  
25  
26 abnormally invasive placenta reduces maternal peripartum hemorrhage and  
27  
28 morbidity. *Acta Obstet Gynecol Scand*. 2013;92:439-44.  
29  
30
- 31 13. Hall T, Wax JR, Lucas FL, Cartin A, Jones M, Pinette MG. Prenatal sonographic  
32  
33 diagnosis of placenta accreta: Impact on maternal and neonatal outcomes. *J Clin*  
34  
35 *Ultrasound*. 2014;42:449-55.  
36  
37
- 38 14. Tabsh KM, Brinkman CR 3rd, King W. Ultrasound diagnosis of placenta increta. *J*  
39  
40 *Clin Ultrasound*. 1982;10:288-90.  
41  
42
- 43 15. Jauniaux E, Bhide A. Prenatal ultrasound diagnosis and outcome of placenta  
44  
45 previa accreta after cesarean delivery: a systematic review and meta-analysis.  
46  
47 *Am J Obstet Gynecol*. 2017;217:27-36.  
48  
49
- 50 16. Jauniaux E, Chantraine F, Silver RM, Langhoff-Roos J; FIGO Placenta Accreta  
51  
52 Diagnosis and Management Expert Consensus Panel. FIGO consensus  
53  
54  
55  
56  
57  
58  
59  
60

- 1  
2  
3 guidelines on placenta accreta spectrum disorders: Epidemiology. *Int J Gynaecol*  
4  
5 *Obstet.* 2018;140:265-73.  
6  
7  
8 17. Collins SL, Stevenson GN, Al-Khan A, Illsley NP, Impey L, Pappas L, et al.  
9  
10 Three-Dimensional Power Doppler Ultrasonography for Diagnosing Abnormally  
11  
12 Invasive Placenta and Quantifying the Risk. *Obstet Gynecol.* 2015;126:645–53.  
13  
14  
15 18. Wells GA, Shea B, O'Connell D, et al. The Newcastle-Ottawa Scale (NOS) for  
16  
17 assessing the quality of nonrandomised studies in meta-analyses.  
18  
19 [www.ohri.ca/programs/clinical epidemiology/oxford.asp] updated 2014;  
20  
21 accessed 10 June, 2018).  
22  
23  
24 19. Chattopadhyay SK, Kharif H, Sherbeeni MM. Placenta praevia and accreta after  
25  
26 previous caesarean section. *Eur J Obstet Gynecol Reprod Biol.* 1993;52:151-6.  
27  
28  
29 20. Zaki ZM, Bahar AM, Ali ME, Albar HA, Gerais MA. Risk factors and morbidity in  
30  
31 patients with placenta previa accreta compared to placenta previa non-  
32  
33 accreta. *Acta Obstet Gynecol Scand.* 1998;77:391-4.  
34  
35  
36 21. Ziadeh SM, Abu-Heija AT, El-Jallad MF. Placental praevia and accreta: an  
37  
38 analysis of two-years' experience. *J Obstet Gynaecol.* 1999;19:584-6.  
39  
40  
41 22. Ghourab S. Third-trimester transvaginal ultrasonography in placenta previa: does  
42  
43 the shape of the lower placental edge predict clinical outcome? *Ultrasound*  
44  
45 *Obstet Gynecol.* 2001;18:103-8.  
46  
47  
48 23. Bahar A, Abusham A, Eskandar M, Sobande A, Alsunaidi M. Risk factors and  
49  
50 pregnancy outcome in different types of placenta previa. *J Obstet Gynaecol Can.*  
51  
52 2009;31:126-31.  
53  
54  
55  
56  
57  
58  
59  
60

- 1  
2  
3 24. Hamada S, Hasegawa J, Nakamura M, Matsuoka R, Ichizuka K, Sekizawa A, et  
4  
5 al. Ultrasonographic findings of placenta lacunae and a lack of  
6  
7 a clear zone in cases with placenta previa and normal placenta. *Prenat Diagn.*  
8  
9 2011;31:1062-5.  
10  
11  
12 25. Jang DG, We JS, Shin JU, Choi YJ, Ko HS, Park IY, et al. Maternal outcomes  
13  
14 according to placental position in placental previa. *Int J Med Sci.* 2011;8:439-44.  
15  
16  
17 26. Rosenberg T, Pariente G, Sergienko R, Wiznitzer A, Sheiner E. Critical analysis  
18  
19 of risk factors and outcome of placenta previa. *Arch Gynecol Obstet.*  
20  
21 2011;284:47-51.  
22  
23  
24 27. Kassem GA, Alzahrani AK. Maternal and neonatal outcomes of placenta previa  
25  
26 and placenta accreta: three years of experience with a two-consultant approach.  
27  
28 *Int J Womens Health.* 2013;28:803-10.  
29  
30  
31 28. Maher MA, Abdelaziz A, Bazeed MF. Diagnostic accuracy of ultrasound and MRI  
32  
33 in the prenatal diagnosis of placenta accreta. *Acta Obstet Gynecol Scand.*  
34  
35 2013;92:1017-22.  
36  
37  
38 29. Alchalabi H, Lataifeh I, Obeidat B, Zayed F, Khader YS, Obeidat N. Morbidly  
39  
40 adherent placenta previa in current practice: prediction and maternal morbidity in  
41  
42 a series of 23 women who underwent hysterectomy. *J Matern Fetal Neonatal*  
43  
44 *Med.* 2014;27:1734-7.  
45  
46  
47 30. Asicioglu O, Şahbaz A, Güngördük K, Yildirim G, Asicioglu BB, Ülker V. Maternal  
48  
49 and perinatal outcomes in women with placenta praevia and accreta in teaching  
50  
51 hospitals in Western Turkey. *J Obstet Gynaecol.* 2014;34:462-6.  
52  
53  
54  
55  
56  
57  
58  
59  
60

- 1  
2  
3 31. Sumigama S, Sugiyama C, Kotani T, Hayakawa H, Inoue A, Mano Y, et al.  
4  
5 Uterine sutures at prior caesarean section and placenta accreta in subsequent  
6  
7 pregnancy: a case-control study. *BJOG*. 2014;121:866-74;  
8  
9
- 10 32. Ahmed SR, Aitallah A, Abdelghafar HM, Alsammani MA.  
11  
12 Major Placenta Previa: Rate, Maternal and Neonatal Outcomes Experience at  
13  
14 a Tertiary Maternity Hospital, Sohag, Egypt: A Prospective Study. *J Clin Diagn*  
15  
16 *Res*. 2015;9:17-9.  
17  
18
- 19 33. Cheng KK, Lee MM. Rising incidence of morbidly adherent placenta and its  
20  
21 association with previous caesarean section: a 15-year analysis in a tertiary  
22  
23 hospital in Hong Kong. *Hong Kong Med J*. 2015;21:511-7.  
24  
25
- 26 34. Cho HY, Hwang HS, Jung I, Park YW, Kwon JY, Kim YH. Diagnosis  
27  
28 of Placenta Accreta by Uterine Artery Doppler Velocimetry in Patients  
29  
30 With Placenta Previa. *J Ultrasound Med*. 2015;34:1571-5.  
31  
32
- 33 35. Kollmann M, Gaulhofer J, Lang U, Klaritsch P. Placenta praevia: incidence, risk  
34  
35 factors and outcome. *J Matern Fetal Neonatal Med*. 2016;29:1395-8.  
36  
37
- 38 36. Pilloni E, Alemanno MG, Gaglioti P, Sciarrone A, Garofalo A, Biolcati M, et al.  
39  
40 Accuracy of ultrasound in antenatal diagnosis of placental attachment disorders.  
41  
42 *Ultrasound Obstet Gynecol*. 2016;47:302-7.  
43  
44
- 45 37. Rezk MA, Shawky M. Grey-scale and colour Doppler ultrasound versus magnetic  
46  
47 resonance imaging for the prenatal diagnosis of placenta accreta. *J Matern Fetal*  
48  
49 *Neonatal Med*. 2016;29:218-23.  
50  
51  
52  
53  
54  
55  
56  
57  
58  
59  
60



- 1  
2  
3 38. Wortman AC, Schaefer SL, McIntire DD, Sheffield JS, Twickler DM.  
4  
5 Complete Placenta Previa: Ultrasound Biometry and Surgical Outcomes. *AJP*  
6  
7 *Rep.* 2018;8:e74-e78.  
8  
9
- 10 39. Gottesfeld KR, Thompson HE, Holmes JH, Taylor ES. Ultrasonic  
11  
12 placentography--a new method for placental localization. *Am J Obstet Gynecol.*  
13  
14 1966;96:538-47.  
15  
16
- 17 40. Kohorn EI, Walker RH, Morrison J, Campbell S. Placental localization. A  
18  
19 comparison between ultrasonic compound B scanning and radioisotope  
20  
21 scanning. *Am J Obstet Gynecol.* 1969;103:868-77.  
22  
23
- 24 41. Ballas S, Gitstein S, Jaffa AJ, Peyser MR. Midtrimester placenta previa: normal or  
25  
26 pathologic finding. *Obstet Gynecol.* 1979;54:12-4.  
27  
28
- 29 42. Leerentveld RA, Gilberts EC, Arnold MJ, Wladimiroff JW. Accuracy and safety of  
30  
31 transvaginal sonographic placental localisation. *Obstet Gynecol* 1990;76:759-62.  
32  
33
- 34 43. Smith RS, Lauria MR, Comstock CH, Treadwell MC, Kirk JS, Lee W, et al.  
35  
36 Transvaginal ultrasonography for all placentas that appear to be low-lying or over  
37  
38 the internal cervical os. *Ultrasound Obstet Gynecol* 1997;9:22-4.  
39
- 40 44. Dashe JS, McIntire DD, Ramus RM, Santos-Ramos R, Twickler DM. Persistence  
41  
42 of placenta previa according to gestational age at ultrasound detection. *Obstet*  
43  
44 *Gynecol* 2002;99:692-7.  
45  
46
- 47 45. Quant HS, Friedman AM, Wang E, Parry S, Schwartz N. Transabdominal  
48  
49 ultrasonography as a screening test for second-trimester placenta previa. *Obstet*  
50  
51 *Gynecol.* 2014;123:628-33.  
52  
53  
54  
55  
56  
57  
58  
59  
60

- 1  
2  
3 46. Reddy UM, Abuhamad AZ, Levine D, Saade GR; Fetal Imaging Workshop Invited  
4  
5 Participants. Fetal imaging: executive summary of a joint Eunice Kennedy Shriver  
6  
7 National Institute of Child Health and Human Development, Society for Maternal-  
8  
9 Fetal Medicine, American Institute of Ultrasound in Medicine, American College of  
10  
11 Obstetricians and Gynecologists, American College of Radiology, Society for  
12  
13 Pediatric Radiology, and Society of Radiologists in Ultrasound Fetal Imaging  
14  
15 Workshop. *J Ultrasound Med*. 2014;33:745-57.  
16  
17  
18  
19 47. Jauniaux E, Collins SL, Jurkovic D, Burton GJ. Accreta placentation: a systematic  
20  
21 review of prenatal ultrasound imaging and grading of villous invasiveness. *Am J*  
22  
23 *Obstet Gynecol*. 2016;215:712-21.  
24  
25  
26 48. Collins SL, Chantraine F, Morgan TK, Jauniaux E. Abnormally adherent and  
27  
28 invasive placenta: a spectrum disorder in need of a name. *Ultrasound Obstet*  
29  
30 *Gynecol*. 2018;51:165-6.  
31  
32  
33 49. Collins SL, Ashcroft A, Braun T, Calda P, Langhoff-Ross J, Morel O et al.,  
34  
35 Proposed for standardized ultrasound descriptions of abnormally invasive placenta  
36  
37 (AIP). *Ultrasound Obstet Gynecol*. 2016;47:271-5.  
38  
39  
40 50. Alfirevic Z, Tang A-W, Collins SL, Robson SC, Palacios-Jaraquemadas, on behalf  
41  
42 of the Ad-hoc International AIP Expert group. Pro forma for ultrasound reporting in  
43  
44 suspected abnormally invasive placenta (AIP); an international consensus.  
45  
46 *Ultrasound Obstet Gynecol*. 2016;47:276-8.  
47  
48  
49 51. Jauniaux E, Bhide A, Kennedy A, Woodward P, Hubinont C, Collins S; FIGO  
50  
51 Placenta Accreta Diagnosis and Management Expert Consensus Panel. FIGO  
52  
53  
54  
55  
56  
57  
58  
59  
60

1  
2  
3 consensus guidelines on placenta accreta spectrum disorders: Prenatal diagnosis  
4 and screening. *Int J Gynaecol Obstet*. 2018;140:274-80.  
5  
6

7  
8 52. Greenbaum S, Wainstock T, Dukler D, Leron E, Erez O. Underlying mechanisms  
9 of retained placenta: Evidence from a population based cohort study. *Eur J Obstet*  
10 *Gynecol Reprod Biol*. 2017;216:12-7.  
11  
12

13  
14 53. Obstetric Care Consensus No. 7 Summary: Placenta Accreta Spectrum. *Obstet*  
15 *Gynecol*. 2018;132:1519-21.  
16  
17

18  
19 54. Bartels HC, Rogers AC, O'Brien D, McVey R, Walsh J, Brennan DJ. Association  
20 of Implementing a Multidisciplinary Team Approach in the Management of  
21 Morbidly Adherent Placenta With Maternal Morbidity and Mortality. *Obstet*  
22 *Gynecol*. 2018; doi: 10.1097/AOG.0000000000002865.  
23  
24  
25  
26  
27

28  
29 55. Wright JD, Silver RM, Bonanno C, Gaddipati S, Lu YS, Simpson LL, et al. Practice  
30 patterns and knowledge of obstetricians and gynecologists regarding placenta  
31 accreta. *J Matern Fetal Neonatal Med*. 2013;26:1602-9.  
32  
33  
34

35  
36 56. Cal M, Ayres-de-Campos D, Jauniaux E. International survey of practices used in  
37 the diagnosis and management of placenta accreta spectrum disorders. *Int J*  
38 *Gynaecol Obstet*. 2018;140:307-11.  
39  
40  
41

42  
43 57. Allen L, Jauniaux E, Hobson S, Papillon-Smith J, Belfort MA; FIGO Placenta  
44 Accreta Diagnosis and Management Expert Consensus Panel. FIGO consensus  
45 guidelines on placenta accreta spectrum disorders: Nonconservative surgical  
46 management. *Int J Gynaecol Obstet*. 2018;140:281-290.  
47  
48  
49  
50  
51  
52  
53  
54  
55  
56  
57  
58  
59  
60

1  
2  
3 58. Farquhar CM, Li Z, Lensen S, McLintock C, Pollock W, Peek MJ et al. Incidence,  
4 risk factors and perinatal outcomes for placenta accreta in Australia and New  
5 Zealand: a case-control study. *BMJ Open*. 2017;7:e017713.  
6  
7

8  
9  
10 59. Sargent W, Collins SL. Are women antenatally diagnosed with abnormally  
11 invasive placenta receiving optimal management in England? An observational  
12 study of planned place of delivery. *Acta Obstet Gynecol Scand*. 2019;98:337-  
13 341.  
14  
15  
16  
17  
18  
19  
20  
21  
22  
23  
24  
25  
26  
27  
28  
29  
30  
31  
32  
33  
34  
35  
36  
37  
38  
39  
40  
41  
42  
43  
44  
45  
46  
47  
48  
49  
50  
51  
52  
53  
54  
55  
56  
57  
58  
59  
60

**Table 1:** Characteristics of the 20 studies included in the review with the corresponding prevalence of placenta previa accreta and incidence placenta accreta spectrum per cohorts of placenta previa.

|                                          | Population                     | Dates     | Study type                                   | Prevalence (%) | Incidence (%) |
|------------------------------------------|--------------------------------|-----------|----------------------------------------------|----------------|---------------|
| Chattopadhyay et al., 1993 <sup>19</sup> | Saudi Arabia/41,206 births     | 1988-1992 | Retrospective/Institution                    | 26 (0.063)     | 26/222 (11.7) |
| Zaki et al., 1998 <sup>20</sup>          | Saudi Arabia/23,070 births     | 1990-1996 | Retrospective/Institution                    | 12 (0.052)     | 12/110 (10.9) |
| Ziadeh et al., 1999 <sup>21</sup>        | Jordan/18,651 births           | 1995-1996 | Prospective/Institution                      | 13 (0.070)     | 13/65 (20.0)  |
| Gourab et al., 2001 <sup>22</sup>        | Saudi Arabia/18,670 births     | 1995-2000 | Prospective/Institution                      | 11 (0.059)     | 11/138 (8.0)  |
| Bahar et al., 2009 <sup>23</sup>         | Saudi Arabia/42,487 births     | 1996-2005 | Retrospective/Institution                    | 53 (0.125)     | 53/306 (17.3) |
| Hamada et al., 2011 <sup>24</sup>        | Japan/2,413 births             | 2007-2009 | Prospective/Institution <sup>¶</sup>         | 5 (0.207)      | 5/70 (7.1)    |
| Jang et al., 2011 <sup>25</sup>          | South Korea/35,030 births      | 1999-2009 | Retrospective/Institutions x 3               | 53 (0.151)     | 53/560 (9.5)  |
| Rosenberg et al., 2011 <sup>26</sup>     | Israel/185,476 births          | 1988-2009 | Retrospective/Region <sup>¶</sup>            | 23 (0.012)     | 23/779 (3.0)  |
| Kassem et al., 2013 <sup>27</sup>        | Saudi Arabia/29,053 births     | 2009-2012 | Retrospective/Institution                    | 25 (0.085)     | 25/122 (20.5) |
| Maher et al., 2013 <sup>28</sup>         | Egypt/24,661 births            | 2008-2011 | Prospective/Institution                      | 42 (0.170)     | 42/577 (7.3)  |
| Alchalabi et al., 2014 <sup>29</sup>     | Jordan/16,845 births           | 2003-2012 | Retrospective/Institution*                   | 23 (0.137)     | 23/81 (28.4)  |
| Ascioglu et al., 2014 <sup>30</sup>      | Turkey/112,819 births          | 2005-2010 | Retrospective/Institution <sup>¶</sup>       | 46 (0.041)     | 46/364 (12.6) |
| Sumigama et al., 2014 <sup>31</sup>      | Japan/96,670 births            | 1994-2012 | Retrospective/Institutions x 11 <sup>¶</sup> | 46 (0.048)     | 46/954 (4.8)  |
| Ahmed et al., 2015 <sup>32</sup>         | Egypt/3,841 births             | 2014      | Prospective/Institution <sup>¶</sup>         | 14 (0.365)     | 14/52 (26.9)  |
| Cheng et al., 2015 <sup>33</sup>         | China/81,497 births            | 1999-2013 | Retrospective/Institution*                   | 39 (0.048)     | 39/921 (4.2)  |
| Cho et al., 2015 <sup>34</sup>           | South Korea/11,210 pregnancies | 1991-2013 | Retrospective/Institution                    | 39 (0.348)     | 39/442 (8.8)  |
| Kollmann et al., 2016 <sup>35</sup>      | Austria/218,876 births         | 1993-2012 | Retrospective/Region                         | 13 (0.006)     | 13/328 (4.0)  |
| Pilloni et al., 2016 <sup>36</sup>       | Italy/108,000 births           | 2011-2014 | Prospective/Region                           | 37 (0.034)     | 37/314 (11.8) |
| Rezk et al., 2016 <sup>37</sup>          | Egypt/12,654 pregnancies       | 2012-2014 | Prospective/Institution <sup>¶</sup>         | 53 (0.419)     | 53/74 (71.6)  |
| Wortman et al., 2018 <sup>38</sup>       | US/138,031 births              | 2002-2011 | Retrospective/Institution <sup>¶</sup>       | 14 (0.010)     | 14/157 (8.9)  |

¶= Studies including major placenta previa only; \* No description of the ultrasound diagnostic signs.

## Figure legends

**Fig 1:** Flow diagram showing the selection of reports included in the review.

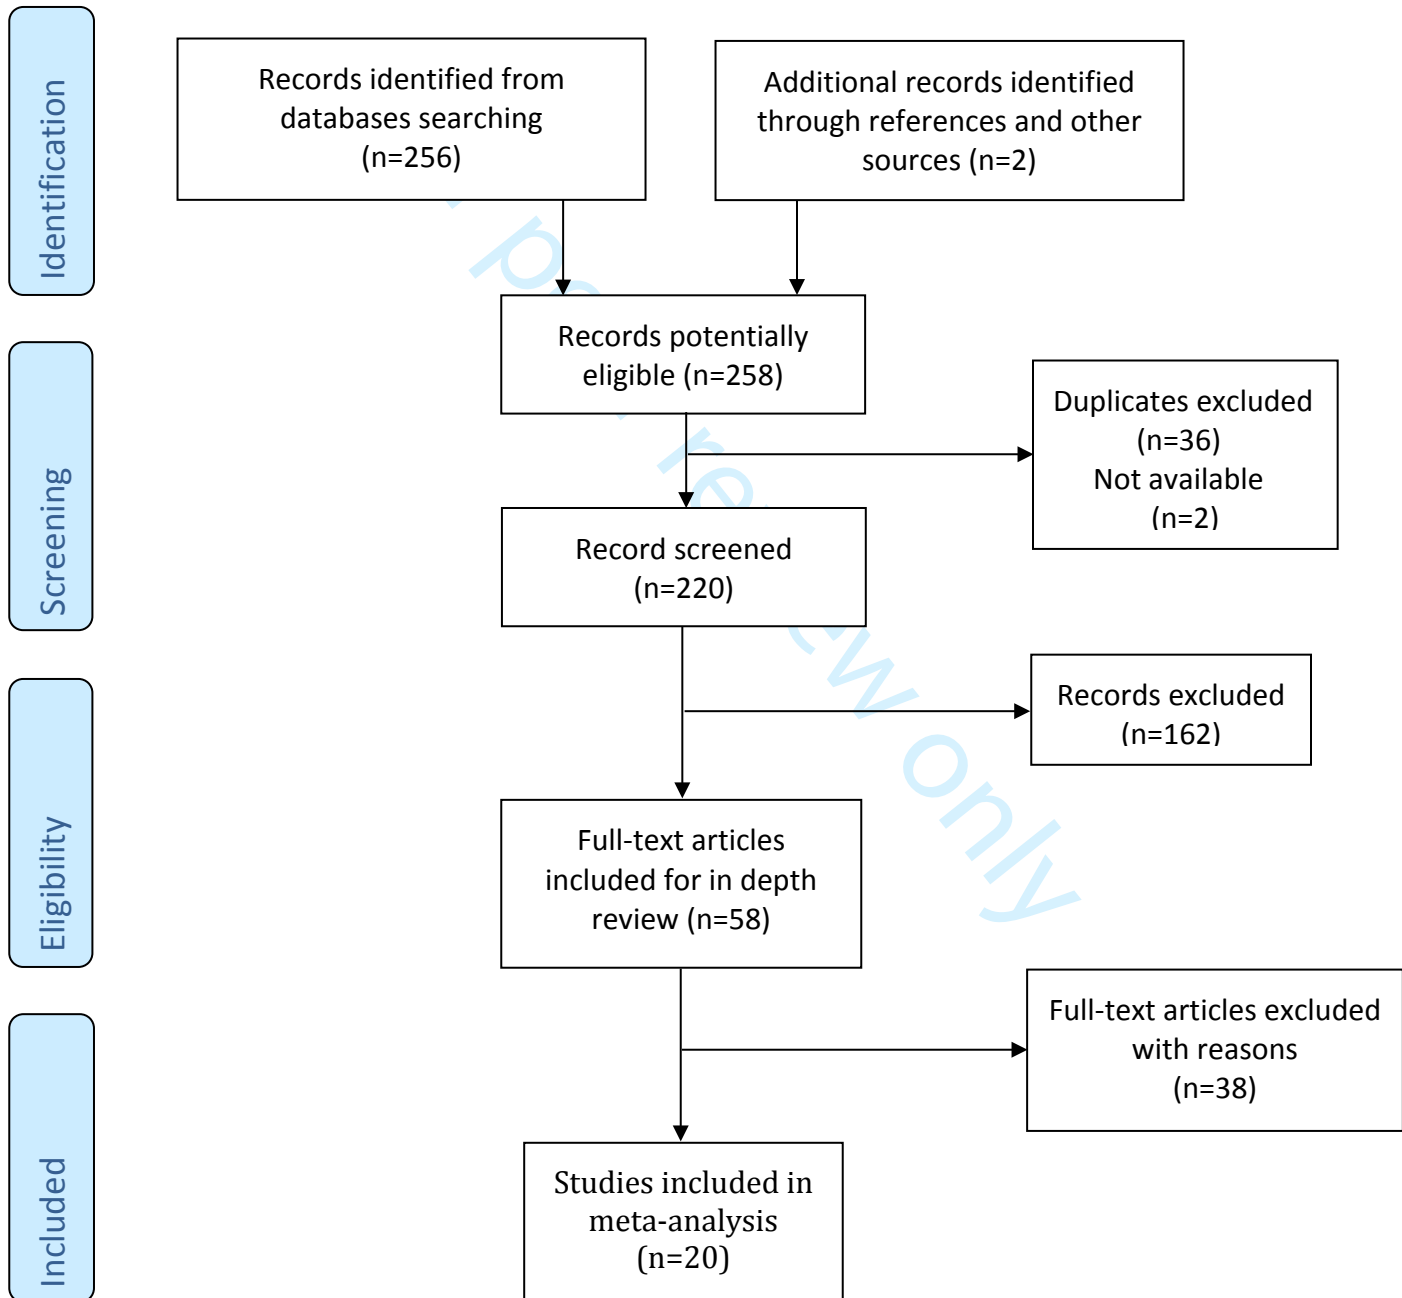

**Fig 2:** Quality assessment using the Newcastle-Ottawa Scale for cohort studies.

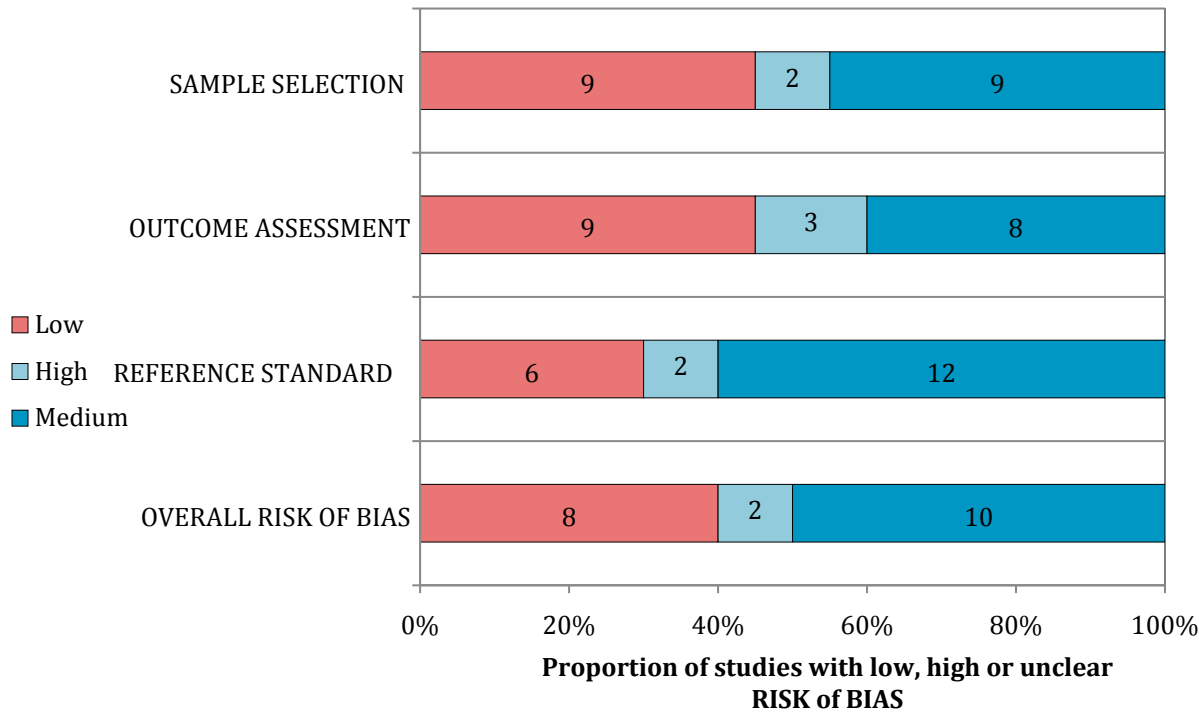

review only

1  
2  
3 **Fig 3:** Forest plots showing the heterogeneity of prevalence data in prospective and  
4 retrospective cohort studies of women presenting with a placenta previa. Only first  
5 author's name is given for each reference.  
6

7  
8 **Fig 4:** Forest plots showing heterogeneity in the prevalence data for prospective and  
9 retrospective cohort studies of women diagnosed with placenta previa and PAS. Only  
10 first author's name is given for each reference.  
11

12 **Fig 5:** Forest plots showing the heterogeneity in cohort studies reporting incidence data  
13 for women diagnosed with placenta previa major and PAS and those with either  
14 placenta previa minor or major and PAS.  
15  
16  
17  
18  
19  
20  
21  
22  
23  
24  
25  
26  
27  
28  
29  
30  
31  
32  
33  
34  
35  
36  
37  
38  
39  
40  
41  
42  
43  
44  
45  
46  
47  
48  
49  
50  
51  
52  
53  
54  
55  
56  
57  
58  
59  
60



1  
2  
3  
4  
5  
6  
7  
8  
9  
10  
11  
12  
13  
14  
15  
16  
17  
18  
19  
20  
21  
22  
23  
24  
25  
26  
27  
28  
29  
30  
31  
32  
33  
34  
35  
36  
37  
38  
39  
40  
41

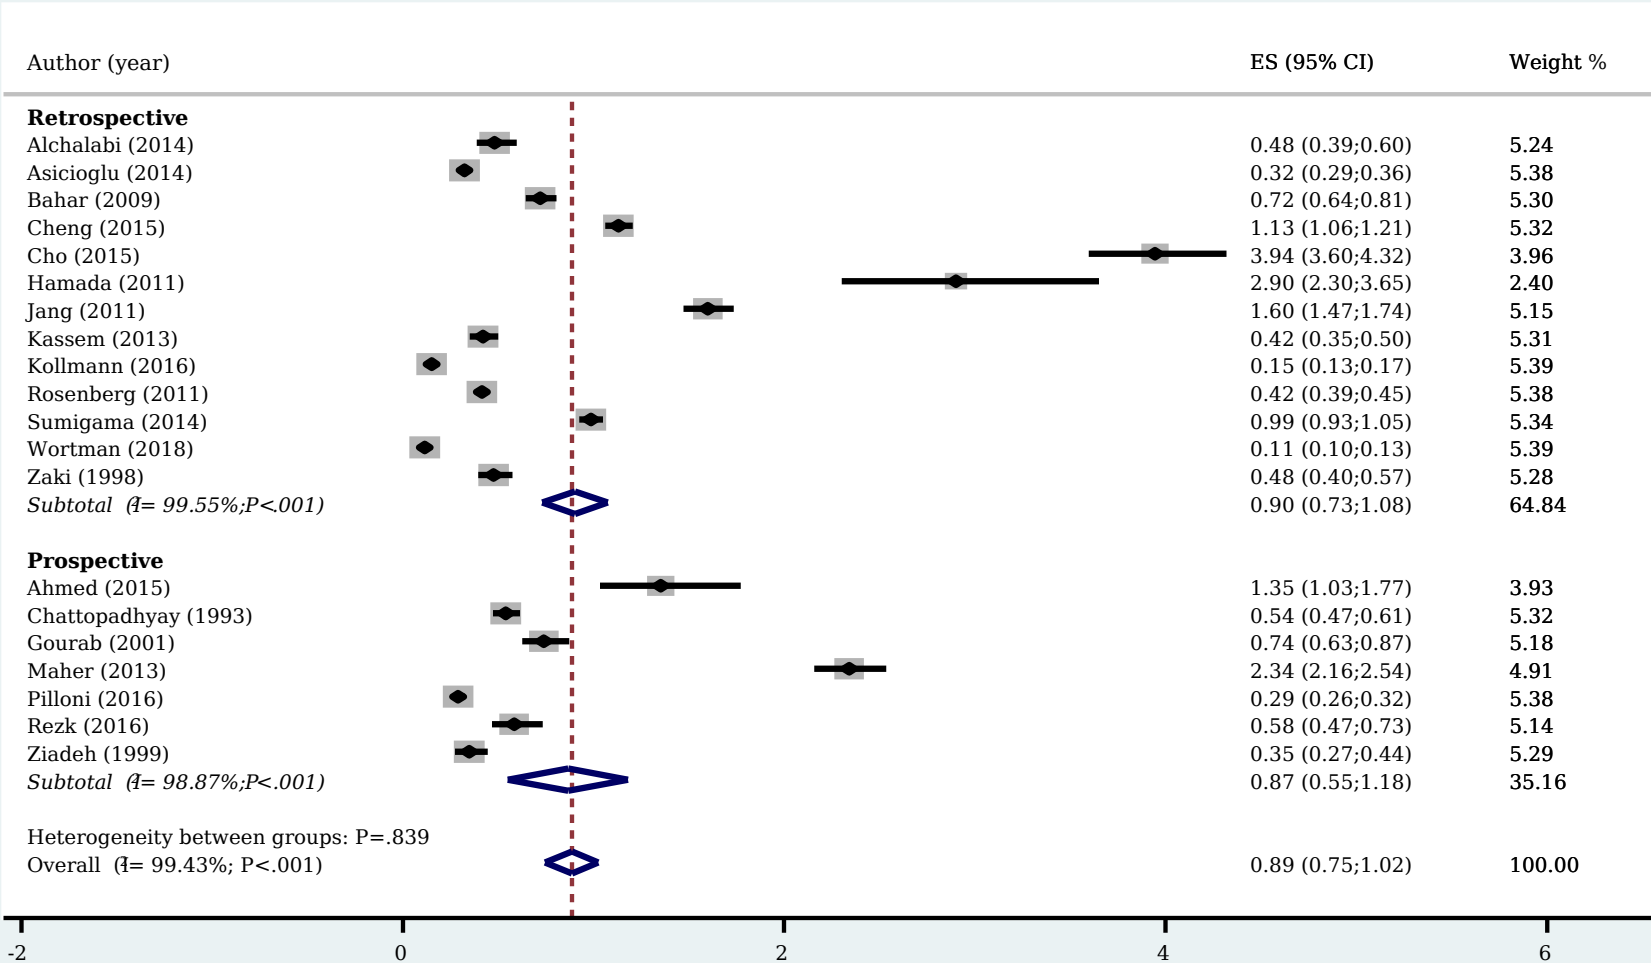

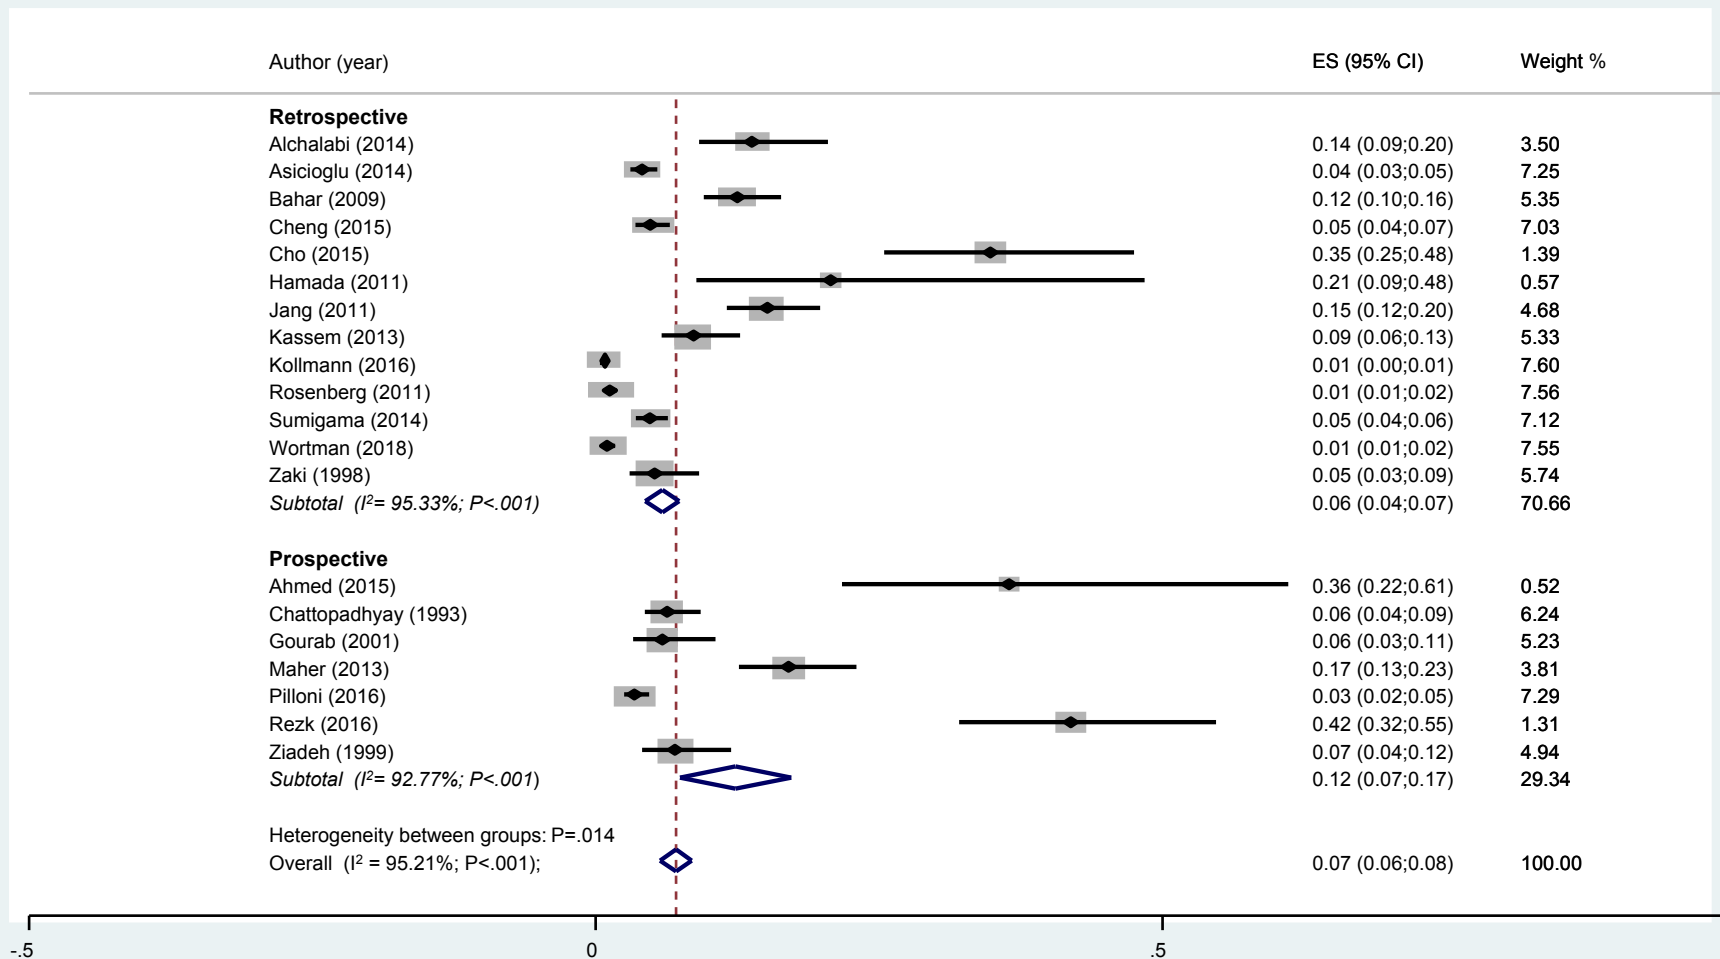

1  
2  
3  
4  
5  
6  
7  
8  
9  
10  
11  
12  
13  
14  
15  
16  
17  
18  
19  
20  
21  
22  
23  
24  
25  
26  
27  
28  
29  
30  
31  
32  
33  
34  
35  
36  
37  
38  
39  
40  
41

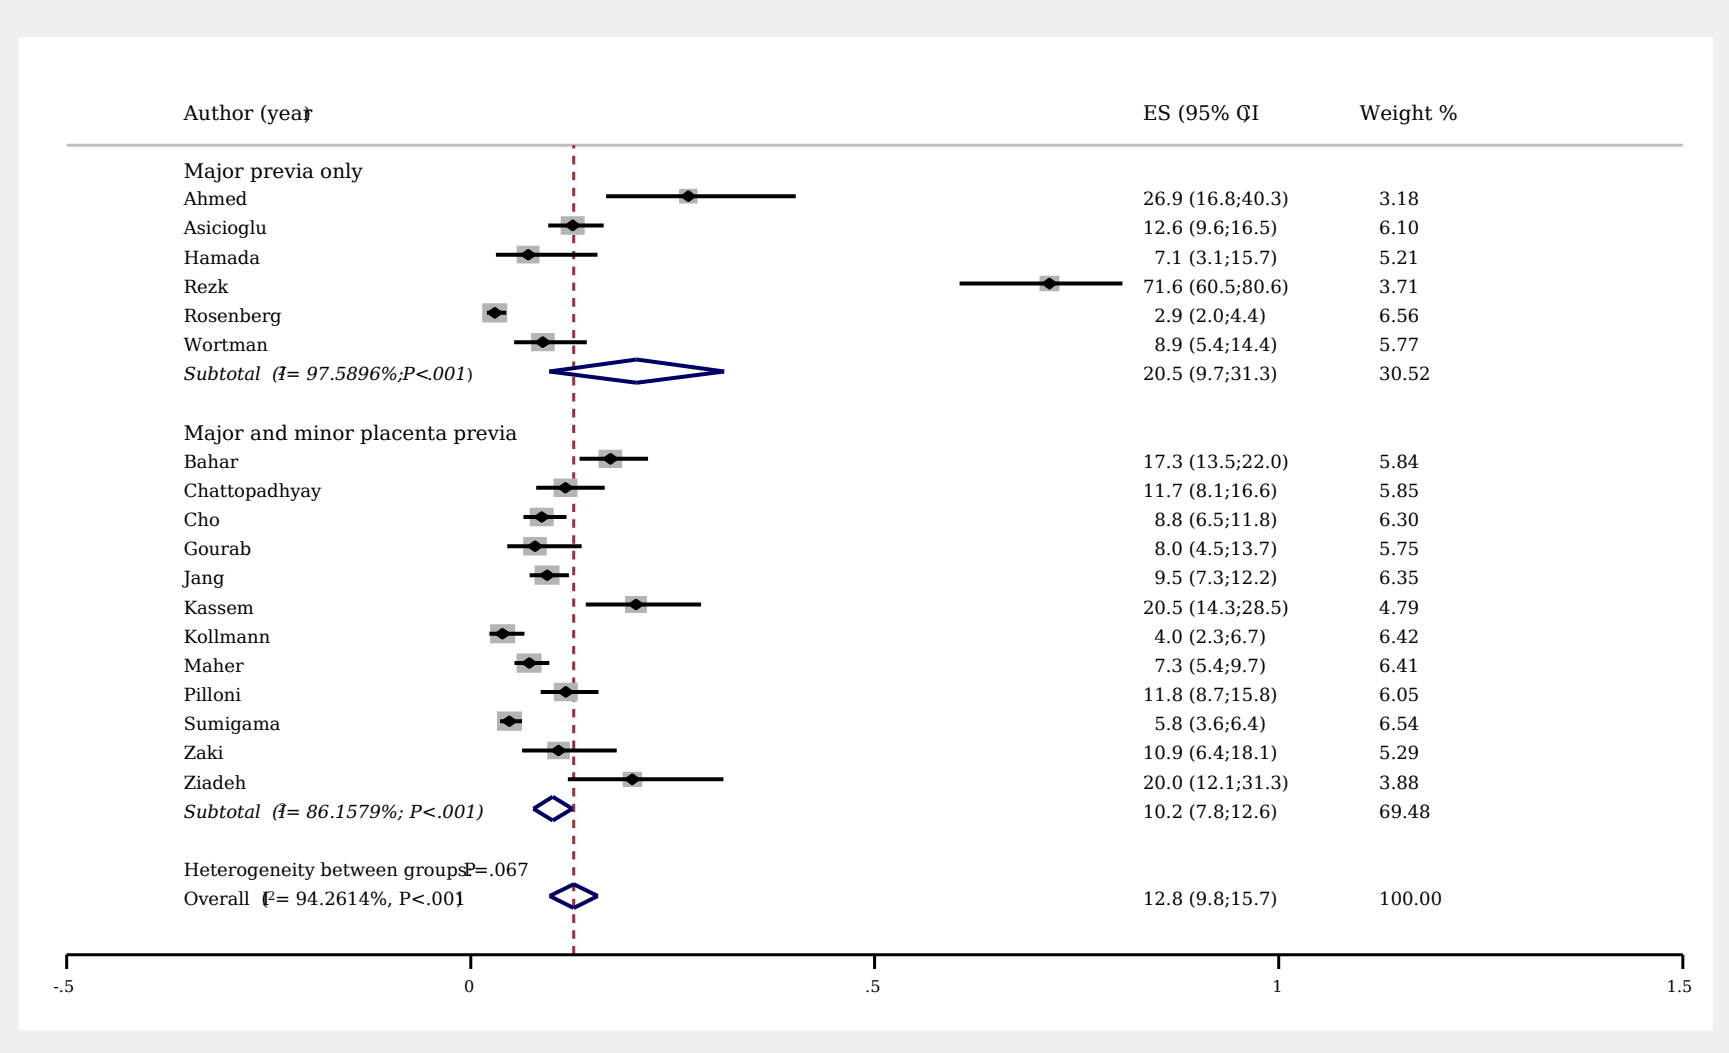

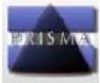

# PRISMA 2009 Checklist

1  
2  
3  
4  
5  
6  
7  
8  
9  
10  
11  
12  
13  
14  
15  
16  
17  
18  
19  
20  
21  
22  
23  
24  
25  
26  
27  
28  
29  
30  
31  
32  
33  
34  
35  
36  
37  
38  
39  
40  
41  
42  
43  
44  
45  
46  
47

| Section/topic                      | #  | Checklist item                                                                                                                                                                                                                                                                                              | Reported on page # |
|------------------------------------|----|-------------------------------------------------------------------------------------------------------------------------------------------------------------------------------------------------------------------------------------------------------------------------------------------------------------|--------------------|
| <b>TITLE</b>                       |    |                                                                                                                                                                                                                                                                                                             |                    |
| Title                              | 1  | Identify the report as a systematic review, meta-analysis, or both.                                                                                                                                                                                                                                         | 1                  |
| <b>ABSTRACT</b>                    |    |                                                                                                                                                                                                                                                                                                             |                    |
| Structured summary                 | 2  | Provide a structured summary including, as applicable: background; objectives; data sources; study eligibility criteria, participants, and interventions; study appraisal and synthesis methods; results; limitations; conclusions and implications of key findings; systematic review registration number. | 2 & 3              |
| <b>INTRODUCTION</b>                |    |                                                                                                                                                                                                                                                                                                             |                    |
| Rationale                          | 3  | Describe the rationale for the review in the context of what is already known.                                                                                                                                                                                                                              | 4                  |
| Objectives                         | 4  | Provide an explicit statement of questions being addressed with reference to participants, interventions, comparisons, outcomes, and study design (PICOS).                                                                                                                                                  | 5                  |
| <b>METHODS</b>                     |    |                                                                                                                                                                                                                                                                                                             |                    |
| Protocol and registration          | 5  | Indicate if a review protocol exists, if and where it can be accessed (e.g., Web address), and, if available, provide registration information including registration number.                                                                                                                               | 6                  |
| Eligibility criteria               | 6  | Specify study characteristics (e.g., PICOS, length of follow-up) and report characteristics (e.g., years considered, language, publication status) used as criteria for eligibility, giving rationale.                                                                                                      | 6 & 7              |
| Information sources                | 7  | Describe all information sources (e.g., databases with dates of coverage, contact with study authors to identify additional studies) in the search and date last searched.                                                                                                                                  | 6                  |
| Search                             | 8  | Present full electronic search strategy for at least one database, including any limits used, such that it could be repeated.                                                                                                                                                                               | 6                  |
| Study selection                    | 9  | State the process for selecting studies (i.e., screening, eligibility, included in systematic review, and, if applicable, included in the meta-analysis).                                                                                                                                                   | 6 & 7              |
| Data collection process            | 10 | Describe method of data extraction from reports (e.g., piloted forms, independently, in duplicate) and any processes for obtaining and confirming data from investigators.                                                                                                                                  | 7 & 8              |
| Data items                         | 11 | List and define all variables for which data were sought (e.g., PICOS, funding sources) and any assumptions and simplifications made.                                                                                                                                                                       | N/A                |
| Risk of bias in individual studies | 12 | Describe methods used for assessing risk of bias of individual studies (including specification of whether this was done at the study or outcome level), and how this information is to be used in any data synthesis.                                                                                      | 7 & 8              |
| Summary measures                   | 13 | State the principal summary measures (e.g., risk ratio, difference in means).                                                                                                                                                                                                                               | 8                  |
| Synthesis of results               | 14 | Describe the methods of handling data and combining results of studies, if done, including measures of consistency (e.g., I <sup>2</sup> ) for each meta-analysis.                                                                                                                                          | 8                  |

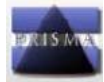

# PRISMA 2009 Checklist

Page 1 of 2

| Section/topic                 | #  | Checklist item                                                                                                                                                                                           | Reported on page # |
|-------------------------------|----|----------------------------------------------------------------------------------------------------------------------------------------------------------------------------------------------------------|--------------------|
| Risk of bias across studies   | 15 | Specify any assessment of risk of bias that may affect the cumulative evidence (e.g., publication bias, selective reporting within studies).                                                             | 7 & 8              |
| Additional analyses           | 16 | Describe methods of additional analyses (e.g., sensitivity or subgroup analyses, meta-regression), if done, indicating which were pre-specified.                                                         | 8                  |
| <b>RESULTS</b>                |    |                                                                                                                                                                                                          |                    |
| Study selection               | 17 | Give numbers of studies screened, assessed for eligibility, and included in the review, with reasons for exclusions at each stage, ideally with a flow diagram.                                          | 8                  |
| Study characteristics         | 18 | For each study, present characteristics for which data were extracted (e.g., study size, PICOS, follow-up period) and provide the citations.                                                             | 8 & 9              |
| Risk of bias within studies   | 19 | Present data on risk of bias of each study and, if available, any outcome level assessment (see item 12).                                                                                                | 9                  |
| Results of individual studies | 20 | For all outcomes considered (benefits or harms), present, for each study: (a) simple summary data for each intervention group (b) effect estimates and confidence intervals, ideally with a forest plot. | 9-11               |
| Synthesis of results          | 21 | Present results of each meta-analysis done, including confidence intervals and measures of consistency.                                                                                                  | 11                 |
| Risk of bias across studies   | 22 | Present results of any assessment of risk of bias across studies (see Item 15).                                                                                                                          | 9                  |
| Additional analysis           | 23 | Give results of additional analyses, if done (e.g., sensitivity or subgroup analyses, meta-regression [see Item 16]).                                                                                    |                    |
| <b>DISCUSSION</b>             |    |                                                                                                                                                                                                          |                    |
| Summary of evidence           | 24 | Summarize the main findings including the strength of evidence for each main outcome; consider their relevance to key groups (e.g., healthcare providers, users, and policy makers).                     | 11-14              |
| Limitations                   | 25 | Discuss limitations at study and outcome level (e.g., risk of bias), and at review-level (e.g., incomplete retrieval of identified research, reporting bias).                                            | 15                 |
| Conclusions                   | 26 | Provide a general interpretation of the results in the context of other evidence, and implications for future research.                                                                                  | 15 & 16            |
| <b>FUNDING</b>                |    |                                                                                                                                                                                                          |                    |
| Funding                       | 27 | Describe sources of funding for the systematic review and other support (e.g., supply of data); role of funders for the systematic review.                                                               | 1                  |

From: Moher D, Liberati A, Tetzlaff J, Altman DG, The PRISMA Group (2009). Preferred Reporting Items for Systematic Reviews and Meta-Analyses: The PRISMA Statement. PLoS Med 6(7): e1000097. doi:10.1371/journal.pmed1000097

For more information, visit: [www.prisma-statement.org](http://www.prisma-statement.org).

Page 2 of 2

For peer review only - <http://bmjopen.bmj.com/site/about/guidelines.xhtml>

# BMJ Open

## Epidemiology of Placenta Previa Accreta: A Systematic Review and Meta-analysis

|                                 |                                                                                                                                                                                                                                                                                                                                                                                             |
|---------------------------------|---------------------------------------------------------------------------------------------------------------------------------------------------------------------------------------------------------------------------------------------------------------------------------------------------------------------------------------------------------------------------------------------|
| Journal:                        | <i>BMJ Open</i>                                                                                                                                                                                                                                                                                                                                                                             |
| Manuscript ID                   | bmjopen-2019-031193.R1                                                                                                                                                                                                                                                                                                                                                                      |
| Article Type:                   | Original research                                                                                                                                                                                                                                                                                                                                                                           |
| Date Submitted by the Author:   | 11-Jul-2019                                                                                                                                                                                                                                                                                                                                                                                 |
| Complete List of Authors:       | Jauniaux, Eric; UCL, EGA Institute for Women Health<br>Grønbeck, Lene; University of Copenhagen, Department of Obstetrics, Rigshospitalet<br>Bunce, Catey; kings College london, Primary Care and Public Health Sciences<br>Langhoff-Roos, Jens; Rigshospitalet Infektionsmedicinsk Klinik,<br>Collins, Sally; University of Oxford, Nuffield Department of Women's and Reproductive Health |
| <b>Primary Subject Heading</b>: | Epidemiology                                                                                                                                                                                                                                                                                                                                                                                |
| Secondary Subject Heading:      | Global health, Obstetrics and gynaecology                                                                                                                                                                                                                                                                                                                                                   |
| Keywords:                       | Placenta previa accreta, Prevalence, Incidence, Low-lying placenta, Placenta previa                                                                                                                                                                                                                                                                                                         |
|                                 |                                                                                                                                                                                                                                                                                                                                                                                             |

SCHOLARONE™  
Manuscripts

# Epidemiology of Placenta Previa Accreta: A Systematic Review and Meta-analysis

Eric Jauniaux,<sup>1</sup> Lene Grønbeck,<sup>2</sup> Catey Bunce,<sup>3</sup> Jens Langhoff-Roos,<sup>2</sup> Sally L Collins<sup>4</sup>

## Author affiliations

1. EGA Institute for Women's Health, Faculty of Population Health Sciences, University College London (UCL), London, UK.
2. Department of Obstetrics, Rigshospitalet, University of Copenhagen, Denmark.
3. Statistic unit, School of Population Health and Environmental Sciences, Kings College London, London UK.
4. Nuffield Department of Women's and Reproductive Health, University of Oxford, UK

## Competing interest

*The authors report no conflict of interest.*

## Funding

*No funding was obtained for this study.*

**Key Words:** Placenta accreta spectrum; prevalence; incidence; low-lying placenta; placenta previa.

**Word counts:** Abstract=294; Main text= 3701.

**Corresponding author:** *Professor Eric Jauniaux, EGA Institute for Women's Health, University College London, 86-96 Chenies Mews, London WC1E 6HX, UK.*

Telephone numbers: +44/207/3908113

Fax: +44/207/3908115

E-mail: e.jauniaux@ucl.ac.uk

## ABSTRACT

**Objective** To estimate the prevalence and incidence of placenta previa complicated by placenta accreta spectrum (PAS) and to examine the different criteria being used for the diagnosis.

**Design** Systematic review and meta-analysis.

**Data Sources** PubMed, Google Scholar, clinicalTrials.gov and MEDLINE were searched between August 1982 and September 2018.

**Eligibility Criteria** Studies reporting on placenta previa complicated by PAS diagnosed in a defined obstetric population.

**Data extraction and synthesis** Two independent reviewers performed the data extraction using a predefined protocol and assessed the risk of bias using the Newcastle-Ottawa scale for observational studies, with difference agreed by consensus. The primary outcomes were overall prevalence of placenta previa, incidence of PAS according to the type of placenta previa and the reported clinical outcomes including number of peri-partum hysterectomies and direct maternal mortality. The secondary outcomes included the criteria used for the prenatal ultrasound diagnosis of placenta previa and the criteria used to diagnose and grade PAS at birth.

**Results** A total of 258 articles were reviewed and 13 retrospective and 7 prospective studies were included in the analysis which reported on 587 women with placenta previa and PAS. The meta-analysis indicated a significant ( $P < .001$ ) heterogeneity between study estimates for the prevalence of placenta previa, the prevalence of placenta previa with PAS and the incidence of PAS in the placenta previa cohort. The median prevalence of placenta previa was 0.56% (IQR 0.39;1.24) whereas the median



1  
2  
3 prevalence of placenta previa with PAS was 0.07% (IQR 0.05;0.16). The incidence of  
4  
5 PAS in women with a placenta previa was 11.10% (IQR 7.65;17.35).  
6

7 **Conclusions** The high heterogeneity in qualitative and diagnostic data between studies  
8  
9 emphasizes the need to implement standardized protocols for the diagnoses of both  
10  
11 placenta previa and PAS, including the type of placenta previa and grade of villous  
12  
13 invasiveness.  
14  
15

16  
17  
18  
19 PROSPERO Registration CRD42017068589  
20  
21  
22

### 23 **Strengths and limitations of this study**

- 24  
25  
26 • This study provides the first comprehensive evaluation of the epidemiology of  
27  
28 placenta previa complicated by PAS.  
29  
30
- 31  
32 • The search was performed using predetermined eligibility criteria in a defined  
33  
34 obstetric population.  
35
- 36  
37 • Thirteen out of 20 studies included in the study were retrospective limiting the  
38  
39 overall quality of the analysis.  
40
- 41  
42 • Only six studies provided data on the prenatal ultrasound diagnosis of PAS in  
43  
44 patients with placenta previa and nine studies on detailed histopathological  
45  
46 findings.  
47
- 48  
49 • High level of inconsistency between estimates in prevalence and incidence did  
50  
51 not allow for full meta-analysis of the clinical outcomes.  
52  
53  
54  
55  
56  
57  
58  
59  
60

## INTRODUCTION

Placenta accreta is a pathological condition of placentation associated with a high risk of massive obstetric hemorrhage during delivery. Initially described in 1937 by Irving and Hertig<sup>1</sup> as the abnormal adherence of the placenta to the myometrium due to the partial or complete absence of decidua basalis, it was subsequently redefined by Lukes et al<sup>2</sup> as a spectrum of abnormally adherent and invasive placentation disorders. Placenta accreta is now graded according to the depth of the villous penetration into the uterine wall starting with the abnormally adherent placenta or creta, where the villi attach directly to the surface of the myometrium without invading it, and extending to the invasive grades of placenta increta, where the villi penetrate deeply into the myometrium up to the uterine serosa, and placenta percreta, where the invasive villous tissue penetrates through the uterine serosa often entering the surrounding pelvic tissues.<sup>3-5</sup> The different grades of the placenta accreta spectrum (PAS) can co-exist in the same specimens and can be focal (just a small area of the placental bed) or extensive (including much of the placental bed).<sup>2</sup>

Over the last two decades, a growing body of epidemiology research has identified the effect of the rapid increase in caesarean delivery rates on the risks of PAS.<sup>6-10</sup> The main additional risk factor after a previous caesarean delivery is placenta previa. A large multicentric U.S. cohort study noted that for women presenting with placenta previa and prior caesarean delivery, the risk of PAS was 3%, 11%, 40%, 61%, and 67% for first, second, third, fourth, and fifth or more cesarean deliveries, respectively.<sup>7</sup> A national case-control study using the UK Obstetric Surveillance System found that the incidence of PAS increases from 1.7 per 10,000 births overall to 577 per

1  
2  
3 10,000 births in women with both a previous caesarean delivery and placenta previa.<sup>8</sup>  
4

5 Both abnormal adherence and invasion of villous tissue into the myometrium  
6 results in failure of the placenta to separate spontaneously from the uterine wall at  
7 delivery.<sup>2-4</sup> When unsuspected at the time of delivery, attempts to manually remove  
8 accreta villous tissue typically provoke rapid bleeding from the utero-placental  
9 circulation.<sup>5,11</sup> In invasive cases, this can lead to massive obstetric hemorrhage due to  
10 the disruption of the deep uterine vasculature of the increta or percreta area.<sup>4,5</sup> Not  
11 surprisingly, prenatal diagnosis of PAS has been shown to decrease maternal morbidity  
12 and mortality, and has thus become essential in improving its management.<sup>12,13</sup> Tabsh et  
13 al were the first in 1982 to report on the prenatal ultrasound diagnosis of a case of  
14 placenta increta.<sup>14</sup> A recent systematic review and meta-analysis of prenatal ultrasound  
15 diagnosis of placenta previa with PAS in women with a history of caesarean delivery has  
16 found that the overall diagnostic accuracy of ultrasound in specialist units is in 90.9%.<sup>15</sup>  
17 However, even in countries with well-established screening programs for fetal anomalies,  
18 over half the cases of PAS are not diagnosed before delivery.<sup>8,10</sup>  
19  
20  
21  
22  
23  
24  
25  
26  
27  
28  
29  
30  
31  
32  
33  
34  
35  
36  
37

38 Accreta placentation and in particular its invasive forms are impacting maternal  
39 health outcomes globally and its prevalence is likely to increase. Women with a history  
40 of previous caesarean delivery presenting with placenta previa complicated by PAS in  
41 an ongoing pregnancy are now the cohort of obstetric patients with the highest risk of  
42 delivery complications<sup>16</sup>, however, their epidemiology has not been comprehensively  
43 reviewed yet. Health provision for the development of maternity centres with specialist  
44 teams, equipment, drugs, blood bank and intensive care infrastructure to safely manage  
45 women presenting with placenta previa and PAS requires an accurate evaluation of its  
46  
47  
48  
49  
50  
51  
52  
53  
54  
55  
56  
57  
58  
59  
60

1  
2  
3 epidemiology. The objective of this meta-analysis is to review the epidemiology of  
4  
5 women presenting with placenta previa and to examine the different criteria used by the  
6  
7 authors of cohort studies to diagnose placenta previa and PAS prenatally and to confirm  
8  
9 the diagnosis of PAS at birth.  
10  
11  
12  
13

## 14 **MATERIALS AND METHODS**

15  
16  
17 A systematic review was undertaken of articles providing data on prevalence and  
18  
19 incidence of PAS in women presenting with a placenta previa where the populations  
20  
21 sampled were defined. PubMed, Google Scholar, clinicalTrials.gov and MEDLINE were  
22  
23 searched for studies published between the first prenatal ultrasound description of  
24  
25 placenta accreta in August 1982 by Tabsh<sup>14</sup> et al and September 2018. The search  
26  
27 protocol was designed *a priori* and registered on PROSPERO (CRD42017068589). The  
28  
29 overall search strategy was inclusive of MeSH headings for “placenta accreta, placenta  
30  
31 increta, placenta percreta, abnormally invasive placenta, morbidly adherent placenta  
32  
33 and major placenta previa” which were combined with terms including “prevalence,  
34  
35 incidence, obstetric hysterectomy and caesarean hysterectomy”. Title, abstracts and  
36  
37 full-text were independently assessed by the authors for content, data extraction and  
38  
39 analysis. Additional relevant studies were identified from reference lists of reviews and  
40  
41 editorials and by hand-searching key journals and websites. All search results were  
42  
43 combined in a reference database. Duplicates were removed by hand. The search was  
44  
45 limited to articles published in English.  
46  
47  
48  
49  
50  
51

52 Two independent investigators (EJ and LG) selected studies in two stages. The  
53  
54 abstracts of all potentially relevant papers were individually examined for suitability.  
55  
56  
57  
58  
59  
60

1  
2  
3 Papers were only ruled out at this stage if they obviously did not meet the inclusion  
4 criteria. The remainder were obtained in full text and were independently assessed  
5 for content, data extraction and analysis. Disagreements between the two original  
6 reviewers were resolved by discussion with the third investigator (JLR). Articles were  
7 excluded if; they were published before August 1982, contained no data on the study  
8 population such as the overall pregnancies, births and/or deliveries numbers, were case  
9 reports or were overlapping.  
10  
11  
12  
13  
14  
15  
16  
17  
18

19 Study characteristics were extracted using a predesigned data extraction  
20 protocol including: author institution, year of publication, country of origin, study period,  
21 study type (retrospective, single institution, multiple institutions), total number of cases  
22 in the study population, type of placenta previa, diagnosis of PAS at birth (Appendix 1).  
23 Outcome measures included the need to perform a peripartum hysterectomy and direct  
24 maternal mortality. Prior surgical history was also recorded. The reference standard for  
25 differential diagnosis between minor and major placenta previa was recorded based on  
26 the placental position inside the uterine cavity on transvaginal ultrasound with relation to  
27 the internal cervical os. For the diagnosis of accreta placentation, we referred to the  
28 clinical grading based on surgical findings at delivery as previously described<sup>17</sup> and to  
29 histopathologic findings when a caesarean hysterectomy was performed i.e. placental  
30 villi directly attached to the myometrium without interposing decidua or invading the  
31 uterine wall.  
32  
33  
34  
35  
36  
37  
38  
39  
40  
41  
42  
43  
44  
45  
46  
47  
48

49 Two independent reviewers (EJ and LG) undertook the quality assessment with  
50 difference agreed by consensus. The Newcastle-Ottawa scale for observational studies  
51 was used to establish the risk of bias in selection, comparability, and outcome  
52  
53  
54  
55  
56  
57  
58  
59  
60

1  
2  
3 assessment.<sup>18</sup> Studies that scored four stars for selection, two stars for comparability,  
4 and three stars for ascertainment of the outcome were regarded to have a low risk of  
5 bias. Studies with two or three stars for selection, one for comparability, and two for  
6 outcome ascertainment were considered to have a medium risk of bias. We deemed  
7 any study with a score of one for selection or outcome ascertainment, or zero for any of  
8 the three domains, to have a high risk of bias. No study was excluded based on the risk  
9 of bias assessment.

10  
11 Analyses were conducted using STATA software (version 15; StataCorp, College  
12 Station, TX). Standard Kurtosis analysis indicated that some values were not normally  
13 distributed and study specific estimates are therefore presented as median and  
14 interquartile range (IQR). A random effects model was used to combine the studies  
15 while incorporating variations among studies unless there were three or less studies  
16 contributing to the meta-analysis in which case a fixed effect model was used. Statistical  
17 heterogeneity was assessed with the Cochran's Q-test and the I<sup>2</sup> statistic (the  
18 proportion of variation in study estimates because of heterogeneity rather than sampling  
19 error). Forest plots are presented to graphically summarize the study results and the  
20 pooled results. A test for heterogeneity between sub-groups (i.e. study types) was  
21 conducted.

## 22 **Patients and public involvement**

23 Patients and the public were not involved in the design or planning of the study.

## 24 **RESULTS**

25 The initial search provided 256 records with cross-referencing providing an additional  
26 two studies, making a total of 258 potentially relevant articles. After exclusion of  
27  
28  
29

1  
2  
3 duplicates and the two which were not available (Figure 1), 220 remained. On screening  
4  
5 the titles and abstracts, a further 162 were excluded as the reported outcomes were not  
6  
7 relevant, leaving 58 studies which were obtained for full text review. An additional 38  
8  
9 articles were excluded after full review including letters (n=16), narrative reviews (n= 10)  
10  
11 commentaries (n= 9), conference proceedings (n= 2) and duplication of data in another  
12  
13 publication (n=1), leaving 20 articles for the final analysis.<sup>19-38</sup>  
14  
15

16  
17 The characteristics and the results of the quality assessment are displayed in  
18  
19 table 1. There were 13 retrospective<sup>19,20,23,25-27,29-31,33-35,38</sup> and 7  
20  
21 prospective<sup>21,22,24,28,32,36,37</sup> studies including a total of 1,207,296 births and 23,864 cases  
22  
23 referred as pregnancies. There were 15 studies from a single institution<sup>19-24,27-30,32-34,37,38</sup>  
24  
25 and five from multiple institutions<sup>25,31</sup> or a geographical region.<sup>26,35,36</sup> Overall, 18 studies  
26  
27 had low or medium risk of bias.  
28  
29

30  
31 Table 2 presents the epidemiology data of the 20 studies. These studies included  
32  
33 587 women with placenta previa complicated by PAS out of 6,628 cases of placenta  
34  
35 previa. The median prevalence of placenta previa in the 20 studies was 0.56% (IQR  
36  
37 0.39;1.24) whereas the median prevalence of placenta previa with PAS was 0.07%  
38  
39 (IQR 0.05;0.16). The median incidence of PAS in women with a placenta previa was  
40  
41 11.10% (IQR 7.65;17.35).  
42  
43

44  
45 All authors except two<sup>29,33</sup> reported on the criteria used for the prenatal  
46  
47 ultrasound diagnosis of placenta previa. Six studies<sup>24,26,30,32,37,38</sup> only included major  
48  
49 placenta previa in their cohort as defined as the placenta completely covering or  
50  
51 partially covering the internal os of the cervix. The others included both major and minor  
52  
53 placenta previa. The definition of minor placenta previa varied with two studies<sup>31,36</sup> using  
54  
55  
56  
57  
58  
59

1  
2  
3 the placental edge being <2cm from the internal os, two studies using < 3cm<sup>22,23</sup> and  
4 one study using <3 cm or <5 cm if associated with abnormal fetal presentation.<sup>21</sup> The  
5 gestational age at confirmation of the prenatal diagnosis of placenta previa was  
6 reported in six studies <sup>22,23,24,28,32,37</sup> and ranged between 20 weeks and 34 weeks and in  
7 one study the diagnosis of placenta previa was confirmed at birth when the placenta  
8 was found to be inserted in the lower segment.<sup>19</sup>

9  
10  
11  
12  
13  
14  
15  
16  
17 The ultrasound diagnostic signs for PAS were reported in six studies<sup>24,28,30,32,36,37</sup>  
18 with two studies also reporting on the use of magnetic resonance imaging.<sup>29,38</sup> The  
19 clinical criteria used for the diagnosis of PAS at birth were reported by nine  
20 studies<sup>19,20,23,27,28,30,33,36,37</sup> and included a difficult delivery of the placenta without easy  
21 separation uterine wall or requiring a “piecemeal removal” associated with heavy  
22 bleeding and excessive bleeding from the placental bed after placental delivery. One  
23 author described the presence of invasive villous tissue at delivery<sup>27</sup> and one the need  
24 to suture the placental bed.<sup>23</sup> None of the other authors reported on the gross  
25 appearance of the uterus or surgical findings at the time of caesarean delivery. In 12  
26 studies<sup>19,23,24,27-31,33,34,36,37</sup> the prenatal and/or clinical diagnosis was confirmed by  
27 histopathological examination with detailed description of the microscopic criterion only  
28 reported in six<sup>19,27,28,30,31,37</sup>. Detailed histopathological findings on the depth of villous  
29 invasiveness were reported in nine studies<sup>24,27-29,31,33,34,36,37</sup> out of the 20 studies. These  
30 included 283 cases of placenta previa accreta graded for 171 (60.4%) as placenta creta  
31 (adherent), 74 (26.2%) as placenta increta and 38 (13.4%) as placenta percreta.

32  
33  
34  
35  
36  
37  
38  
39  
40  
41  
42  
43  
44  
45  
46  
47  
48  
49  
50  
51  
52 The meta-analysis indicated statistically significant (P<.001) level of overall  
53 heterogeneity between study estimates for the prevalence of placenta previa (Figure 2),  
54  
55  
56  
57  
58  
59  
60



1  
2  
3 the prevalence of placenta previa with PAS (Figure 3) and the incidence of PAS in the  
4 placenta previa cohort (Figure 4). There was strong evidence of inconsistency between  
5 study types with  $I^2$  values greater 85%. The difference in heterogeneity between  
6 prospective versus retrospective studies was not statistically significantly ( $P=.839$ )  
7 different (Figure 2) whereas it was significant ( $P=.014$ ) for the prevalence of placenta  
8 previa accreta (Figure 3). Adjusting for type of study (prospective versus retrospective)  
9 did not reduce inconsistency between studies. The in-between placenta previa major  
10 only versus minor and major placental previa was not significant ( $P=.067$ ) for the  
11 incidence of PAS in patient with placenta previa (Figure 4).

12  
13 All authors but two<sup>22,23</sup> reported on prior surgical history including  
14 caesarean section<sup>19-21,24-38</sup>, uterine curettage<sup>28,30-32,34,37,38</sup> and myomectomy.<sup>28,36,37</sup> Data  
15 on surgical management was available in 14 out of the 20 studies<sup>19,20,23,27-31,33-38</sup> with  
16 314 out of 441 women presenting with a placenta previa complicated by PAS. The  
17 median peri-partum hysterectomy rate of 69.2% (IQR 50.0;84.0). Data on maternal  
18 mortality were available in 13 studies<sup>19-21,23,25,27-30,32,35,37,38</sup> and PAS accounted for 5  
19 maternal deaths<sup>19,20,25,29,30</sup> out of 387 (1.3%) cases of placenta previa with PAS.

## 20 21 22 23 24 25 26 27 28 29 30 31 32 33 34 35 36 37 38 39 40 41 42 **DISCUSSION**

43  
44 This study provides a comprehensive evaluation of the prevalence of placenta previa  
45 complicated by PAS and the incidence of PAS in women presenting with a placenta  
46 previa. Women with a prior history of caesarean delivery presenting with a low-  
47 lying/placenta previa represent more than 90% of the cases of PAS.<sup>8,10,16</sup> The meta-  
48 analysis indicates high heterogeneity for both the prenatal diagnosis of placenta previa  
49  
50  
51  
52  
53  
54  
55  
56  
57  
58  
59  
60

1  
2  
3 and for the confirmation of the diagnosis of PAS at delivery. These findings highlight the  
4 need to use international standardized clinical protocols for the screening and  
5 management of this complex obstetric condition. The current situation limits the capacity  
6 building of healthcare providers on improvements in training, implementation of  
7 guidelines and changes in clinical practice behaviour.  
8  
9  
10  
11  
12  
13

14  
15 Defining the position of the placenta inside the uterus was one of the first aims of  
16 obstetric ultrasound examination.<sup>39,40</sup> Following the development of real-time ultrasound  
17 imaging, placental location became an integral part of the mid-pregnancy ultrasound  
18 examination.<sup>41</sup> Placenta previa was initially described with transabdominal scan as a  
19 placenta developing within the lower uterine segment and classified according to the  
20 relationship and/or the distance between the lower placental edge and the internal os of  
21 the uterine cervix i.e. minor placenta previa when lower edge is inside the lower uterine  
22 segment down to the internal os and major placenta previa when the placenta covers the  
23 cervix. Minor placenta previa can be further subdivided into low-lying placenta when the  
24 lower edge does not reach the internal os and marginal placenta previa when it does.  
25 Major placenta previa can also be described as partial or complete depending on the  
26 amount of placental tissue covering the cervix. The use of transvaginal scanning has  
27 allowed for a more precise evaluation of the distance between the placental edge and the  
28 internal os<sup>42,43</sup> but as demonstrated in our meta-analysis, the reporting of the ultrasound  
29 criteria used for the diagnosis of placenta previa has been heterogenous. In addition, we  
30 found also wide variation in the gestational age at diagnosis. The timing of the  
31 confirmation of the diagnosis has a direct impact on epidemiology data as up to 70% of  
32 minor placenta previa at 20-23 weeks of gestation will resolve by 32-35 weeks.<sup>44,45</sup> An  
33  
34  
35  
36  
37  
38  
39  
40  
41  
42  
43  
44  
45  
46  
47  
48  
49  
50  
51  
52  
53  
54  
55  
56  
57  
58  
59  
60

1  
2  
3 expert panel of the American Institute of Ultrasound in Medicine<sup>46</sup> has recently  
4 recommended ceasing the use of the terms 'partial' and 'marginal' and using the term  
5 'placenta previa' only when the placenta lies directly over the internal os. The placenta  
6 should be reported as 'low lying' when the placental edge is less than 2 cm from the  
7 internal os and as normal when the placental edge is more than 2 cm from the internal  
8 os. The findings of our meta-analysis highlight the need for the use of such a classification  
9 in further studies.  
10  
11  
12  
13  
14  
15  
16  
17  
18

19 Only six of the 20 studies included in the present meta-analysis provided data on  
20 the prenatal ultrasound diagnosis of PAS in patients with placenta previa. We included  
21 in the systematic review all studies published since the first ultrasound description of  
22 PAS by Tabsh et al in 1982.<sup>14</sup> We found no studies between 1982 and 1993 (Table 1)  
23 which corresponds to the time when high-resolution grey-scale ultrasound imaging  
24 became widely available. Colour-Doppler imaging was introduced for the diagnosis of  
25 PAS in 1992<sup>47</sup>, however the sensitivity and specificity of grey-scale imaging alone in  
26 diagnosing for placenta previa accreta are high when performed by experience  
27 operators.<sup>15</sup> These findings indicate that the prenatal diagnosis of PAS can be  
28 performed using standard ultrasound equipment. Unlike placenta previa which is  
29 routinely screened for at the time of the fetal anomaly scan, PAS is currently not  
30 screened for and the data available on the prenatal diagnosis of the condition come  
31 exclusively from specialist centres.<sup>16</sup> In these centres, the diagnostic accuracy of  
32 ultrasound imaging is over 90%, but similar to placenta previa, the description of the  
33 ultrasound signs used for the diagnosis of PAS has also been highly variable over the  
34 last two decades.<sup>47,48</sup> The European Working Group on Abnormally Invasive Placenta  
35  
36  
37  
38  
39  
40  
41  
42  
43  
44  
45  
46  
47  
48  
49  
50  
51  
52  
53  
54  
55  
56  
57  
58  
59  
60

1  
2  
3 and the Abnormally Invasive Placenta international expert group have recently  
4  
5 proposed standardised descriptions of the ultrasound signs used for the prenatal  
6  
7 diagnosis and a protocol for the ultrasound assessment of PAS.<sup>49,50</sup> The use of these  
8  
9 protocols in prospective studies should also facilitate the screening of patients at high  
10  
11 risk of PAS and in particular those with multiple prior caesarean deliveries presenting  
12  
13 with a low-lying or placenta previa.<sup>51</sup>  
14  
15

16  
17 We found significant heterogeneity in the qualitative definition and diagnosis of  
18  
19 PAS at birth among the nine studies that provided a description of the clinical  
20  
21 findings.<sup>19,20,23,27,28,30,33,36,37</sup> Only one of these studies described the invasive  
22  
23 appearance of placental tissue at delivery<sup>27</sup> whereas the others reported a difficult  
24  
25 delivery of the placenta without easy separation from the uterine wall or requiring a  
26  
27 “piecemeal removal” associated with heavy bleeding as diagnostic of PAS. These  
28  
29 clinical criteria were first described by Irving and Hertig<sup>1</sup> in 1937 who did not have  
30  
31 invasive cases in their cohort and thus their definition only applies to abnormally  
32  
33 adherent placenta and not to placenta increta or percreta. This definition also fails to  
34  
35 clearly differentiate between abnormal adherence and placental retention as both  
36  
37 present with similar clinical symptoms and etiology<sup>52</sup> leading to possible over diagnosis  
38  
39 of placenta previa accreta. Similarly, the finding of excessive bleeding from the  
40  
41 placental bed after delivery of the placenta is a common complication of non-accreta  
42  
43 placenta previa due to the implantation of the placenta in the lower uterine segment  
44  
45 which contains less muscular fibers than the upper segment and is often thinner and  
46  
47 dehiscent after multiple caesarean deliveries.  
48  
49  
50  
51  
52

53  
54 Detailed histopathologic reports can only be obtained in those patients who have  
55  
56  
57  
58  
59

1  
2  
3 a hysterectomy or a partial myometrial resection and thus in many studies there is not  
4  
5 histopathologic confirmation of the clinical diagnosis. The main histological diagnostic  
6  
7 criteria of accreta placentation i.e. absence of decidua between the tip of anchoring villi  
8  
9 and the superficial myometrium, is found with increasing incidence with advancing  
10  
11 gestation in pregnancies with no clinical evidence of PAS.<sup>5</sup> Thus the combination of  
12  
13 clinical criteria that do not differentiate between placenta retention and adherent accreta  
14  
15 and the use of non-diagnostic criteria of villous invasiveness may result in the over-  
16  
17 diagnosis of the adherent grade of PAS, in particular in those studies reporting a low  
18  
19 rate of caesarean hysterectomy.<sup>28,36</sup> Overall, this can explain the wide range in the  
20  
21 prevalence (0.04 to 0.42%) of placenta previa with PAS and incidence (2.9 to 71.6%) of  
22  
23 PAS in women presenting with placenta previa (Figures 3 and 4).

24  
25  
26  
27  
28 Overall, management strategies and outcomes will vary depending on the  
29  
30 accuracy of prenatal diagnosis, local surgical expertise and more recently access to a  
31  
32 centre of excellence with multidisciplinary team approach.<sup>53,54</sup> In cases of high suspicion  
33  
34 of PAS during cesarean delivery, 60-70% of obstetricians gynecologists proceed with a  
35  
36 peripartum hysterectomy.<sup>55,56</sup> By contrast with a conservative management approach,  
37  
38 radical surgery is often considered to be safer, in particular in cases of invasive  
39  
40 placentation.<sup>57</sup> The association between a placenta previa and a PAS increases the  
41  
42 risks of both maternal morbidity and mortality. In the present study we found that a  
43  
44 caesarean hysterectomy was the primary management option in around 70% of the  
45  
46 patients presenting with a placenta previa and PAS. The inter-study range was wide  
47  
48 with four studies<sup>19,21,29,37</sup> reporting peripartum hysterectomy rates < 50%, five<sup>28,31,32,34,36</sup>  
49  
50 had rates between 50-99% and four<sup>22,30,35,38</sup> had rates of 100%. This may be due to  
51  
52  
53  
54  
55  
56  
57  
58  
59  
60

1  
2  
3 difference in study protocols, local expertise and the impact of prenatal diagnosis on  
4 management strategies but also as suggested by our analysis to difference in the rates  
5 of the different grades of PAS and the accuracy of clinical diagnosis at birth and detailed  
6 histopathologic examination confirming the diagnosis.  
7  
8  
9  
10

11  
12 The main limitations of this review are the quality of the published data. Thirteen  
13 out of 20 studies included in the analysis studies were retrospective and there was wide  
14 variation in the use of different ultrasound criteria for the prenatal diagnosis of placenta  
15 previa, in the clinical diagnosis of PAS at delivery and in the authors providing detailed  
16 histopathology data to confirm the clinical diagnosis. This is hampering the meta-  
17 analysis of the clinical outcomes in particular the incidence of major hemorrhage at  
18 delivery and the need and amount of blood transfusion but also the choice in  
19 management protocols and in particular the use of conservative management  
20 procedures. We would not, therefore, recommend the use of the pooled estimates  
21 beyond that of a driver towards the development of standardized diagnostic protocols.  
22  
23  
24  
25  
26  
27  
28  
29  
30  
31  
32  
33  
34

35 The prevalence of PAS in the general population of women giving birth varies  
36 widely.<sup>8,10,58,59</sup> A systematic review and meta-analysis of the prevalence of placenta  
37 praevia has found evidence suggestive of regional variation.<sup>60</sup> As both conditions are  
38 often associated with prior caesarean sections it is likely that national and local caesarean  
39 delivery rates, expertise in diagnosing both conditions antenatally and access to perinatal  
40 pathologist to confirm the diagnosis of PAS at birth will influence these epidemiology data.  
41  
42  
43  
44  
45  
46  
47  
48  
49 There is a need for further prospective multi-centre studies with participatory  
50 methodologies involving local service providers and facility management to accurately  
51 evaluate the consequences of high caesarean sections rates on maternal health within a  
52  
53  
54  
55  
56  
57  
58  
59  
60

1  
2  
3 particular population. Within this context, accurate epidemiologic data on PAS disorders  
4  
5 are essential in planning screening programs and in making provision for the development  
6  
7 of centres of excellence for the management of this increasingly common complex  
8  
9 obstetric condition. Whilst the concept of core outcome measures within clinical trials is  
10  
11 now well recognised and championed, greater efforts are required to disseminate this  
12  
13 approach in epidemiological research to facilitate global estimation and recognition of  
14  
15 problems emerging on a worldwide scale. Our study supports implementation, in both  
16  
17 clinical practice and in reporting data on placenta previa accreta in the medical literature,  
18  
19 of standardized protocols for prenatal diagnosis of both placenta previa and PAS, for the  
20  
21 clinical diagnosis of PAS at birth and for the histopathologic confirmation examination.  
22  
23  
24  
25  
26  
27  
28  
29  
30

### 31 **Author contributions**

32  
33 EJ, CB and JLR contributed equally to the study design. EJ, LG and JLR collected the  
34  
35 data and carried out the qualitative analysis. CB and EJ carried out the quantitative  
36  
37 analysis. EJ, JLR and SC drafted the manuscript. All authors were involved in the critical  
38  
39 discussion and approved this final version for publication. EJ is the guarantor of the study.  
40  
41  
42  
43  
44

### 45 **Data sharing statement**

46  
47 Data relevant to the study are available from the Dryad digital repository

48  
49 doi:10.5061/dryad.5ds4833  
50  
51  
52  
53  
54  
55  
56  
57  
58  
59  
60

## REFERENCES

1. Irving C, Hertig AT. A study of placenta accreta. *Surgery, Gynecol Obstet* 1937;64:178-200.
2. Luke RK, Sharpe JW, Greene RR. Placenta accreta: The adherent or invasive placenta. *Am J Obstet Gynecol* 1966;95:660–8.
3. Jauniaux E, Jurkovic D. Placenta accreta: pathogenesis of a 20th century iatrogenic uterine disease. *Placenta*. 2012;33:244-51.
4. Jauniaux E, Bhide A, Burton GJ. Pathophysiology of accreta. In: Silver, R. ed. *Placenta accreta syndrome*. Portland: CRC Press; 2017:13–28.
5. Jauniaux E, Collins SL, Burton GJ. Placenta accreta spectrum: Pathophysiology and evidence-based anatomy for prenatal ultrasound imaging. *Am J Obstet Gynecol*. 2018;218:75-87.
6. Wu S, Kocherginsky M, Hibbard JU. Abnormal placentation: twenty-year analysis. *Am J Obstet Gynecol*. 2005;192:1458–61.
7. Silver RM, Landon MB, Rouse DJ, Leveno KJ, Spong CY, Thom EA, et al.; National Institute of Child Health and Human Development Maternal-Fetal Medicine Units Network. Maternal morbidity associated with multiple repeat cesarean deliveries. *Obstet Gynecol* 2006;107:1226–32.
8. Fitzpatrick KE, Sellers S, Spark P, Kurinczuk JJ, Brocklehurst P, Knight M. Incidence and risk factors for placenta accreta/increta/percreta in the UK: a national case-control study. *PLoS One*. 2012;7:e52893.



- 1  
2  
3 9. Bowman ZS, Eller AG, Bardsley TR, Greene T, Varner MW, Silver RM. Risk  
4  
5 Factors for Placenta Accreta: A Large Prospective Cohort. *Am J Perinatol*.  
6  
7 2014;31:799-804.  
8  
9
- 10 10. Thurn L, Lindqvist PG, Jakobsson M, Colmorn LB, Klungsoyr K, Bjarnadóttir RI,  
11  
12 et al. Abnormally invasive placenta-prevalence, risk factors and antenatal  
13  
14 suspicion: results from a large population-based pregnancy cohort study in the  
15  
16 Nordic countries. *BJOG*. 2016;123:1348-55.  
17  
18
- 19 11. Silver RM, Branch DW. Placenta Accreta Spectrum. *N Engl J Med*.  
20  
21 2018;378:1529-36.  
22  
23
- 24 12. Chantraine F, Braun T, Gonser M, Henrich W, Tutschek B. Prenatal diagnosis of  
25  
26 abnormally invasive placenta reduces maternal peripartum hemorrhage and  
27  
28 morbidity. *Acta Obstet Gynecol Scand*. 2013;92:439-44.  
29  
30
- 31 13. Hall T, Wax JR, Lucas FL, Cartin A, Jones M, Pinette MG. Prenatal sonographic  
32  
33 diagnosis of placenta accreta: Impact on maternal and neonatal outcomes. *J Clin*  
34  
35 *Ultrasound*. 2014;42:449-55.  
36  
37
- 38 14. Tabsh KM, Brinkman CR 3rd, King W. Ultrasound diagnosis of placenta increta. *J*  
39  
40 *Clin Ultrasound*. 1982;10:288-90.  
41  
42
- 43 15. Jauniaux E, Bhide A. Prenatal ultrasound diagnosis and outcome of placenta  
44  
45 previa accreta after cesarean delivery: a systematic review and meta-analysis.  
46  
47 *Am J Obstet Gynecol*. 2017;217:27-36.  
48  
49
- 50 16. Jauniaux E, Chantraine F, Silver RM, Langhoff-Roos J; FIGO Placenta Accreta  
51  
52 Diagnosis and Management Expert Consensus Panel. FIGO consensus  
53  
54  
55  
56  
57  
58  
59  
60

- 1  
2  
3 guidelines on placenta accreta spectrum disorders: Epidemiology. *Int J Gynaecol*  
4  
5 *Obstet.* 2018;140:265-73.  
6  
7  
8 17. Collins SL, Stevenson GN, Al-Khan A, Illsley NP, Impey L, Pappas L, et al.  
9  
10 Three-Dimensional Power Doppler Ultrasonography for Diagnosing Abnormally  
11  
12 Invasive Placenta and Quantifying the Risk. *Obstet Gynecol.* 2015;126:645–53.  
13  
14  
15 18. Wells GA, Shea B, O'Connell D, et al. The Newcastle-Ottawa Scale (NOS) for  
16  
17 assessing the quality of nonrandomised studies in meta-analyses.  
18  
19 [www.ohri.ca/programs/clinical epidemiology/oxford.asp] updated 2014;  
20  
21 accessed 10 June, 2018).  
22  
23  
24 19. Chattopadhyay SK, Kharif H, Sherbeeni MM. Placenta praevia and accreta after  
25  
26 previous caesarean section. *Eur J Obstet Gynecol Reprod Biol.* 1993;52:151-6.  
27  
28  
29 20. Zaki ZM, Bahar AM, Ali ME, Albar HA, Gerais MA. Risk factors and morbidity in  
30  
31 patients with placenta previa accreta compared to placenta previa non-  
32  
33 accreta. *Acta Obstet Gynecol Scand.* 1998;77:391-4.  
34  
35  
36 21. Ziadeh SM, Abu-Heija AT, El-Jallad MF. Placental praevia and accreta: an  
37  
38 analysis of two-years' experience. *J Obstet Gynaecol.* 1999;19:584-6.  
39  
40  
41 22. Ghourab S. Third-trimester transvaginal ultrasonography in placenta previa: does  
42  
43 the shape of the lower placental edge predict clinical outcome? *Ultrasound*  
44  
45 *Obstet Gynecol.* 2001;18:103-8.  
46  
47  
48 23. Bahar A, Abusham A, Eskandar M, Sobande A, Alsunaidi M. Risk factors and  
49  
50 pregnancy outcome in different types of placenta previa. *J Obstet Gynaecol Can.*  
51  
52 2009;31:126-31.  
53  
54  
55  
56  
57  
58  
59  
60

- 1  
2  
3 24. Hamada S, Hasegawa J, Nakamura M, Matsuoka R, Ichizuka K, Sekizawa A, et  
4  
5 al. Ultrasonographic findings of placenta lacunae and a lack of  
6  
7 a clear zone in cases with placenta previa and normal placenta. *Prenat Diagn.*  
8  
9 2011;31:1062-5.  
10  
11  
12 25. Jang DG, We JS, Shin JU, Choi YJ, Ko HS, Park IY, et al. Maternal outcomes  
13  
14 according to placental position in placental previa. *Int J Med Sci.* 2011;8:439-44.  
15  
16  
17 26. Rosenberg T, Pariente G, Sergienko R, Wiznitzer A, Sheiner E. Critical analysis  
18  
19 of risk factors and outcome of placenta previa. *Arch Gynecol Obstet.*  
20  
21 2011;284:47-51.  
22  
23  
24 27. Kassem GA, Alzahrani AK. Maternal and neonatal outcomes of placenta previa  
25  
26 and placenta accreta: three years of experience with a two-consultant approach.  
27  
28 *Int J Womens Health.* 2013;28:803-10.  
29  
30  
31 28. Maher MA, Abdelaziz A, Bazeed MF. Diagnostic accuracy of ultrasound and MRI  
32  
33 in the prenatal diagnosis of placenta accreta. *Acta Obstet Gynecol Scand.*  
34  
35 2013;92:1017-22.  
36  
37  
38 29. Alchalabi H, Lataifeh I, Obeidat B, Zayed F, Khader YS, Obeidat N. Morbidly  
39  
40 adherent placenta previa in current practice: prediction and maternal morbidity in  
41  
42 a series of 23 women who underwent hysterectomy. *J Matern Fetal Neonatal*  
43  
44 *Med.* 2014;27:1734-7.  
45  
46  
47 30. Asicioglu O, Şahbaz A, Güngördük K, Yildirim G, Asicioglu BB, Ülker V. Maternal  
48  
49 and perinatal outcomes in women with placenta praevia and accreta in teaching  
50  
51 hospitals in Western Turkey. *J Obstet Gynaecol.* 2014;34:462-6.  
52  
53  
54  
55  
56  
57  
58  
59  
60

- 1  
2  
3 31. Sumigama S, Sugiyama C, Kotani T, Hayakawa H, Inoue A, Mano Y, et al.  
4  
5 Uterine sutures at prior caesarean section and placenta accreta in subsequent  
6  
7 pregnancy: a case-control study. *BJOG*. 2014;121:866-74;  
8  
9
- 10 32. Ahmed SR, Aitallah A, Abdelghafar HM, Alsammani MA.  
11  
12 Major Placenta Previa: Rate, Maternal and Neonatal Outcomes Experience at  
13  
14 a Tertiary Maternity Hospital, Sohag, Egypt: A Prospective Study. *J Clin Diagn*  
15  
16 *Res*. 2015;9:17-9.  
17  
18
- 19 33. Cheng KK, Lee MM. Rising incidence of morbidly adherent placenta and its  
20  
21 association with previous caesarean section: a 15-year analysis in a tertiary  
22  
23 hospital in Hong Kong. *Hong Kong Med J*. 2015;21:511-7.  
24  
25
- 26 34. Cho HY, Hwang HS, Jung I, Park YW, Kwon JY, Kim YH. Diagnosis  
27  
28 of Placenta Accreta by Uterine Artery Doppler Velocimetry in Patients  
29  
30 With Placenta Previa. *J Ultrasound Med*. 2015;34:1571-5.  
31  
32
- 33 35. Kollmann M, Gaulhofer J, Lang U, Klaritsch P. Placenta praevia: incidence, risk  
34  
35 factors and outcome. *J Matern Fetal Neonatal Med*. 2016;29:1395-8.  
36  
37
- 38 36. Pilloni E, Alemanno MG, Gaglioti P, Sciarrone A, Garofalo A, Biolcati M, et al.  
39  
40 Accuracy of ultrasound in antenatal diagnosis of placental attachment disorders.  
41  
42 *Ultrasound Obstet Gynecol*. 2016;47:302-7.  
43  
44
- 45 37. Rezk MA, Shawky M. Grey-scale and colour Doppler ultrasound versus magnetic  
46  
47 resonance imaging for the prenatal diagnosis of placenta accreta. *J Matern Fetal*  
48  
49 *Neonatal Med*. 2016;29:218-23.  
50  
51  
52  
53  
54  
55  
56  
57  
58  
59  
60

- 1  
2  
3 38. Wortman AC, Schaefer SL, McIntire DD, Sheffield JS, Twickler DM.  
4  
5 Complete Placenta Previa: Ultrasound Biometry and Surgical Outcomes. *AJP*  
6  
7 *Rep.* 2018;8:e74-e78.  
8  
9
- 10 39. Gottesfeld KR, Thompson HE, Holmes JH, Taylor ES. Ultrasonic  
11  
12 placentography--a new method for placental localization. *Am J Obstet Gynecol.*  
13  
14 1966;96:538-47.  
15  
16
- 17 40. Kohorn EI, Walker RH, Morrison J, Campbell S. Placental localization. A  
18  
19 comparison between ultrasonic compound B scanning and radioisotope  
20  
21 scanning. *Am J Obstet Gynecol.* 1969;103:868-77.  
22  
23
- 24 41. Ballas S, Gitstein S, Jaffa AJ, Peyser MR. Midtrimester placenta previa: normal or  
25  
26 pathologic finding. *Obstet Gynecol.* 1979;54:12-4.  
27  
28
- 29 42. Leerentveld RA, Gilberts EC, Arnold MJ, Wladimiroff JW. Accuracy and safety of  
30  
31 transvaginal sonographic placental localisation. *Obstet Gynecol* 1990;76:759-62.  
32  
33
- 34 43. Smith RS, Lauria MR, Comstock CH, Treadwell MC, Kirk JS, Lee W, et al.  
35  
36 Transvaginal ultrasonography for all placentas that appear to be low-lying or over  
37  
38 the internal cervical os. *Ultrasound Obstet Gynecol* 1997;9:22-4.  
39
- 40 44. Dashe JS, McIntire DD, Ramus RM, Santos-Ramos R, Twickler DM. Persistence  
41  
42 of placenta previa according to gestational age at ultrasound detection. *Obstet*  
43  
44 *Gynecol* 2002;99:692-7.  
45  
46
- 47 45. Quant HS, Friedman AM, Wang E, Parry S, Schwartz N. Transabdominal  
48  
49 ultrasonography as a screening test for second-trimester placenta previa. *Obstet*  
50  
51 *Gynecol.* 2014;123:628-33.  
52  
53  
54  
55  
56  
57  
58  
59  
60

- 1  
2  
3 46. Reddy UM, Abuhamad AZ, Levine D, Saade GR; Fetal Imaging Workshop Invited  
4  
5 Participants. Fetal imaging: executive summary of a joint Eunice Kennedy Shriver  
6  
7 National Institute of Child Health and Human Development, Society for Maternal-  
8  
9 Fetal Medicine, American Institute of Ultrasound in Medicine, American College of  
10  
11 Obstetricians and Gynecologists, American College of Radiology, Society for  
12  
13 Pediatric Radiology, and Society of Radiologists in Ultrasound Fetal Imaging  
14  
15 Workshop. *J Ultrasound Med*. 2014;33:745-57.  
16  
17  
18  
19 47. Jauniaux E, Collins SL, Jurkovic D, Burton GJ. Accreta placentation: a systematic  
20  
21 review of prenatal ultrasound imaging and grading of villous invasiveness. *Am J*  
22  
23 *Obstet Gynecol*. 2016;215:712-21.  
24  
25  
26 48. Collins SL, Chantraine F, Morgan TK, Jauniaux E. Abnormally adherent and  
27  
28 invasive placenta: a spectrum disorder in need of a name. *Ultrasound Obstet*  
29  
30 *Gynecol*. 2018;51:165-6.  
31  
32  
33 49. Collins SL, Ashcroft A, Braun T, Calda P, Langhoff-Ross J, Morel O et al.,  
34  
35 Proposed for standardized ultrasound descriptions of abnormally invasive placenta  
36  
37 (AIP). *Ultrasound Obstet Gynecol*. 2016;47:271-5.  
38  
39  
40 50. Alfirevic Z, Tang A-W, Collins SL, Robson SC, Palacios-Jaraquemadas, on behalf  
41  
42 of the Ad-hoc International AIP Expert group. Pro forma for ultrasound reporting in  
43  
44 suspected abnormally invasive placenta (AIP); an international consensus.  
45  
46 *Ultrasound Obstet Gynecol*. 2016;47:276-8.  
47  
48  
49 51. Jauniaux E, Bhide A, Kennedy A, Woodward P, Hubinont C, Collins S; FIGO  
50  
51 Placenta Accreta Diagnosis and Management Expert Consensus Panel. FIGO  
52  
53  
54  
55  
56  
57  
58  
59  
60

- 1  
2  
3 consensus guidelines on placenta accreta spectrum disorders: Prenatal diagnosis  
4 and screening. *Int J Gynaecol Obstet*. 2018;140:274-80.  
5  
6  
7  
8 52. Greenbaum S, Wainstock T, Dukler D, Leron E, Erez O. Underlying mechanisms  
9 of retained placenta: Evidence from a population based cohort study. *Eur J Obstet*  
10 *Gynecol Reprod Biol*. 2017;216:12-7.  
11  
12  
13 53. Obstetric Care Consensus No. 7 Summary: Placenta Accreta Spectrum. *Obstet*  
14 *Gynecol*. 2018;132:1519-21.  
15  
16  
17 54. Bartels HC, Rogers AC, O'Brien D, McVey R, Walsh J, Brennan DJ. Association  
18 of Implementing a Multidisciplinary Team Approach in the Management of  
19 Morbidly Adherent Placenta With Maternal Morbidity and Mortality. *Obstet*  
20 *Gynecol*. 2018; doi: 10.1097/AOG.0000000000002865.  
21  
22  
23 55. Wright JD, Silver RM, Bonanno C, Gaddipati S, Lu YS, Simpson LL, et al. Practice  
24 patterns and knowledge of obstetricians and gynecologists regarding placenta  
25 accreta. *J Matern Fetal Neonatal Med*. 2013;26:1602-9.  
26  
27  
28 56. Cal M, Ayres-de-Campos D, Jauniaux E. International survey of practices used in  
29 the diagnosis and management of placenta accreta spectrum disorders. *Int J*  
30 *Gynaecol Obstet*. 2018;140:307-11.  
31  
32  
33 57. Allen L, Jauniaux E, Hobson S, Papillon-Smith J, Belfort MA; FIGO Placenta  
34 Accreta Diagnosis and Management Expert Consensus Panel. FIGO consensus  
35 guidelines on placenta accreta spectrum disorders: Nonconservative surgical  
36 management. *Int J Gynaecol Obstet*. 2018;140:281-290.  
37  
38  
39  
40  
41  
42  
43  
44  
45  
46  
47  
48  
49  
50  
51  
52  
53  
54  
55  
56  
57  
58  
59  
60

- 1  
2  
3 58. Farquhar CM, Li Z, Lensen S, McLintock C, Pollock W, Peek MJ et al. Incidence,  
4 risk factors and perinatal outcomes for placenta accreta in Australia and New  
5 Zealand: a case-control study. *BMJ Open*. 2017;7:e017713.  
6  
7  
8  
9  
10 59. Sargent W, Collins SL. Are women antenatally diagnosed with abnormally  
11 invasive placenta receiving optimal management in England? An observational  
12 study of planned place of delivery. *Acta Obstet Gynecol Scand*. 2019;98:337-  
13 341.  
14  
15  
16  
17  
18  
19 60. Cresswell JA, Ronsmans C, Calvert C, Filippi V. Prevalence of placenta praevia  
20 by world region: a systematic review and meta-analysis. *Trop Med Int*  
21 *Health*. 2013;18:712-24.  
22  
23  
24  
25  
26  
27  
28  
29  
30  
31  
32  
33  
34  
35  
36  
37  
38  
39  
40  
41  
42  
43  
44  
45  
46  
47  
48  
49  
50  
51  
52  
53  
54  
55  
56  
57  
58  
59  
60



**Table 1:** Characteristics and quality assessment of the 20 studies included in the review.

|                                          | Country      | Dates     | Study type                                     | Risk of bias Categories |               |         | Overall |
|------------------------------------------|--------------|-----------|------------------------------------------------|-------------------------|---------------|---------|---------|
|                                          |              |           |                                                | Selection               | Comparability | Outcome |         |
| Chattopadhyay et al., 1993 <sup>19</sup> | Saudi Arabia | 1988-1992 | Retrospective/ Single Institution              | ⊗⊗                      | ⊗             | ⊗⊗      | Medium  |
| Zaki et al., 1998 <sup>20</sup>          | Saudi Arabia | 1990-1996 | Retrospective/ Single Institution              | ⊗⊗                      | ⊗             | ⊗       | High    |
| Ziadeh et al., 1999 <sup>21</sup>        | Jordan       | 1995-1996 | Prospective/ Single Institution                | ⊗⊗⊗                     | ⊗             | ⊗⊗      | Medium  |
| Gourab et al., 2001 <sup>22</sup>        | Saudi Arabia | 1995-2000 | Prospective/ Single Institution                | ⊗⊗⊗                     | ⊗             | ⊗⊗      | Medium  |
| Bahar et al., 2009 <sup>23</sup>         | Saudi Arabia | 1996-2005 | Retrospective/ Single Institution              | ⊗⊗                      | ⊗             | ⊗⊗      | Medium  |
| Hamada et al., 2011 <sup>24</sup>        | Japan        | 2007-2009 | Prospective/ Single Institution <sup>¶</sup>   | ⊗⊗⊗⊗                    | ⊗⊗            | ⊗⊗⊗     | Low     |
| Jang et al., 2011 <sup>25</sup>          | South Korea  | 1999-2009 | Retrospective/ 3 Institutions                  | ⊗⊗                      | ⊗             | ⊗⊗      | Medium  |
| Rosenberg et al., 2011 <sup>26</sup>     | Israel       | 1988-2009 | Retrospective/ Region <sup>¶</sup>             | ⊗⊗                      | ⊗             | ⊗⊗      | Medium  |
| Kassem et al., 2013 <sup>27</sup>        | Saudi Arabia | 2009-2012 | Retrospective/ Single Institution              | ⊗⊗⊗                     | ⊗             | ⊗⊗      | Medium  |
| Maher et al., 2013 <sup>28</sup>         | Egypt        | 2008-2011 | Prospective/ Single Institution                | ⊗⊗⊗⊗                    | ⊗⊗            | ⊗⊗⊗     | Low     |
| Alchalabi et al., 2014 <sup>29</sup>     | Jordan       | 2003-2012 | Retrospective/ Single Institution*             | ⊗⊗                      | ⊗             | ⊗⊗      | Medium  |
| Asicioglu et al., 2014 <sup>30</sup>     | Turkey       | 2005-2010 | Retrospective/ Single Institution <sup>¶</sup> | ⊗⊗⊗⊗                    | ⊗⊗            | ⊗⊗⊗     | Low     |
| Sumigama et al., 2014 <sup>31</sup>      | Japan        | 1994-2012 | Retrospective/ 11 Institutions <sup>¶</sup>    | ⊗⊗⊗⊗                    | ⊗⊗            | ⊗⊗⊗     | Low     |
| Ahmed et al., 2015 <sup>32</sup>         | Egypt        | 2014      | Prospective/ Single Institution <sup>¶</sup>   | ⊗⊗                      | ⊗             | ⊗       | High    |
| Cheng et al., 2015 <sup>33</sup>         | China        | 1999-2013 | Retrospective/ Single Institution*             | ⊗⊗⊗⊗                    | ⊗⊗            | ⊗⊗⊗     | Low     |
| Cho et al., 2015 <sup>34</sup>           | South-Korea  | 1991-2013 | Retrospective/ Single Institution              | ⊗⊗                      | ⊗             | ⊗⊗      | Medium  |
| Kollmann et al., 2016 <sup>35</sup>      | Austria      | 1993-2012 | Retrospective/ Region                          | ⊗⊗⊗⊗                    | ⊗⊗            | ⊗⊗⊗     | Low     |
| Pilloni et al., 2016 <sup>36</sup>       | Italy        | 2011-2014 | Prospective/ Region                            | ⊗⊗⊗⊗                    | ⊗⊗            | ⊗⊗⊗     | Low     |
| Rezk et al., 2016 <sup>37</sup>          | Egypt        | 2012-2014 | Prospective/ Single Institution <sup>¶</sup>   | ⊗⊗⊗⊗                    | ⊗⊗            | ⊗⊗⊗     | Low     |
| Wortman et al., 2018 <sup>38</sup>       | US           | 2002-2011 | Retrospective/ Single Institution <sup>¶</sup> | ⊗⊗                      | ⊗             | ⊗⊗      | Medium  |

¶= Studies including major placenta previa only; \* Studies with no description of the ultrasound diagnostic signs for PAS.

**Table 2:** Prevalence of placenta previa with placenta accreta spectrum (PAS) per pregnancies or births in the corresponding obstetric population and incidence of PAS per cohorts of placenta previa.

|                                          | <b>Obstetric population</b> | <b>Prevalence (%)</b> | <b>Incidence (%)</b> |
|------------------------------------------|-----------------------------|-----------------------|----------------------|
| Chattopadhyay et al., 1993 <sup>19</sup> | 41,206 births               | 26 (0.063)            | 26/222 (11.7)        |
| Zaki et al., 1998 <sup>20</sup>          | 23,070 births               | 12 (0.052)            | 12/110 (10.9)        |
| Ziadeh et al., 1999 <sup>21</sup>        | 18,651 births               | 13 (0.070)            | 13/65 (20.0)         |
| Gourab et al., 2001 <sup>22</sup>        | 18,670 births               | 11 (0.059)            | 11/138 (8.0)         |
| Bahar et al., 2009 <sup>23</sup>         | 42,487 births               | 53 (0.125)            | 53/306 (17.3)        |
| Hamada et al., 2011 <sup>24</sup>        | 2,413 births                | 5 (0.207)             | 5/70 (7.1)           |
| Jang et al., 2011 <sup>25</sup>          | 35,030 births               | 53 (0.151)            | 53/560 (9.5)         |
| Rosenberg et al., 2011 <sup>26</sup>     | 185,476 births              | 23 (0.012)            | 23/779 (3.0)         |
| Kassem et al., 2013 <sup>27</sup>        | 29,053 births               | 25 (0.085)            | 25/122 (20.5)        |
| Maher et al., 2013 <sup>28</sup>         | 24,661 births               | 42 (0.170)            | 42/577 (7.3)         |
| Alchalabi et al., 2014 <sup>29</sup>     | 16,845 births               | 23 (0.137)            | 23/81 (28.4)         |
| Ascioglu et al., 2014 <sup>30</sup>      | 112,819 births              | 46 (0.041)            | 46/364 (12.6)        |
| Sumigama et al., 2014 <sup>31</sup>      | 96,670 births               | 46 (0.048)            | 46/954 (4.8)         |
| Ahmed et al., 2015 <sup>32</sup>         | 3,841 births                | 14 (0.365)            | 14/52 26.9           |
| Cheng et al., 2015 <sup>33</sup>         | 81,497 births               | 39 (0.048)            | 39/921 (4.2)         |
| Cho et al., 2015 <sup>34</sup>           | 11,210 pregnancies          | 39 (0.348)            | 39/442 (8.8)         |
| Kollmann et al., 2016 <sup>35</sup>      | 218,876 births              | 13 (0.006)            | 13/328 (4.0)         |
| Pilloni et al., 2016 <sup>36</sup>       | 108,000 births              | 37 (0.034)            | 37/314 (11.8)        |
| Rezk et al., 2016 <sup>37</sup>          | 12,654 pregnancies          | 53 (0.419)            | 53/74 (71.6)         |
| Wortman et al., 2018 <sup>38</sup>       | 148,031 births              | 14 (0.010)            | 14/157 (8.9)         |

## Figure legends

**Fig 1:** Flow diagram showing the selection of reports included in the review.

**Fig 2:** Forest plots showing the heterogeneity of prevalence data in prospective and retrospective cohort studies of women presenting with a placenta previa. Only first author's name is given for each reference. *ES, effect size. CI, confidence interval*

**Fig 3:** Forest plots showing heterogeneity in the prevalence data for prospective and retrospective cohort studies of women diagnosed with placenta previa accreta. Only first author's name is given for each reference. *ES, effect size. CI, confidence interval*

**Fig 4:** Forest plots showing the heterogeneity in cohort studies reporting incidence data for women diagnosed with placenta previa major and PAS and those with either placenta previa minor or major and PAS. *ES, effect size. CI, confidence interval*

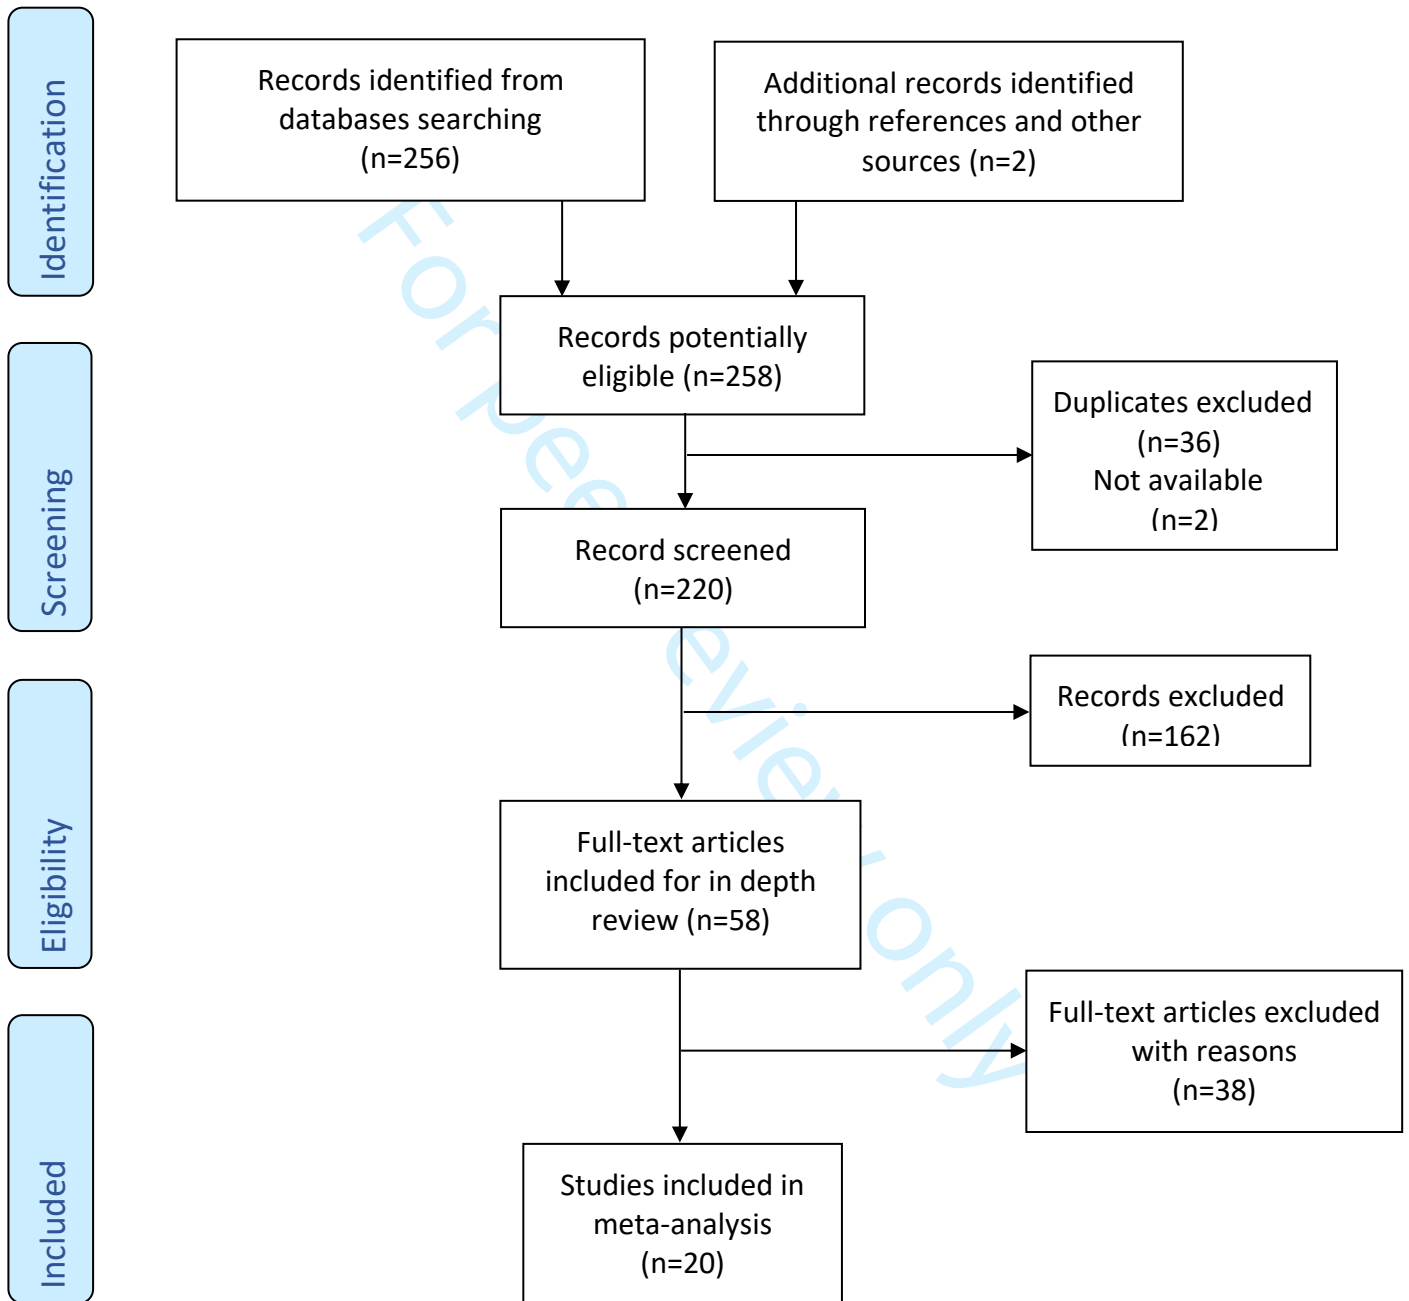

1  
2  
3  
4  
5  
6  
7  
8  
9  
10  
11  
12  
13  
14  
15  
16  
17  
18  
19  
20  
21  
22  
23  
24  
25  
26  
27  
28  
29  
30  
31  
32  
33  
34  
35  
36  
37  
38  
39  
40  
41

Author (year) ES (95% CI) Weight %

**Retrospective**

|                                                    |                  |       |
|----------------------------------------------------|------------------|-------|
| Alchalabi (2014)                                   | 0.48 (0.39;0.60) | 5.24  |
| Ascioglu (2014)                                    | 0.32 (0.29;0.36) | 5.38  |
| Bahar (2009)                                       | 0.72 (0.64;0.81) | 5.30  |
| Cheng (2015)                                       | 1.13 (1.06;1.21) | 5.32  |
| Cho (2015)                                         | 3.94 (3.60;4.32) | 3.96  |
| Hamada (2011)                                      | 2.90 (2.30;3.65) | 2.40  |
| Jang (2011)                                        | 1.60 (1.47;1.74) | 5.15  |
| Kassem (2013)                                      | 0.42 (0.35;0.50) | 5.31  |
| Kollmann (2016)                                    | 0.15 (0.13;0.17) | 5.39  |
| Rosenberg (2011)                                   | 0.42 (0.39;0.45) | 5.38  |
| Sumigama (2014)                                    | 0.99 (0.93;1.05) | 5.34  |
| Wortman (2018)                                     | 0.11 (0.10;0.13) | 5.39  |
| Zaki (1998)                                        | 0.48 (0.40;0.57) | 5.28  |
| <i>Subtotal (I<sup>2</sup>= 99.55%; P&lt;.001)</i> | 0.90 (0.73;1.08) | 64.84 |

**Prospective**

|                                                    |                  |       |
|----------------------------------------------------|------------------|-------|
| Ahmed (2015)                                       | 1.35 (1.03;1.77) | 3.93  |
| Chattopadhyay (1993)                               | 0.54 (0.47;0.61) | 5.32  |
| Gourab (2001)                                      | 0.74 (0.63;0.87) | 5.18  |
| Maher (2013)                                       | 2.34 (2.16;2.54) | 4.91  |
| Pilloni (2016)                                     | 0.29 (0.26;0.32) | 5.38  |
| Rezk (2016)                                        | 0.58 (0.47;0.73) | 5.14  |
| Ziadeh (1999)                                      | 0.35 (0.27;0.44) | 5.29  |
| <i>Subtotal (I<sup>2</sup>= 98.87%; P&lt;.001)</i> | 0.87 (0.55;1.18) | 35.16 |

Heterogeneity between groups: P=.839

Overall (I<sup>2</sup>= 99.43%; P<.001) 0.89 (0.75;1.02) 100.00

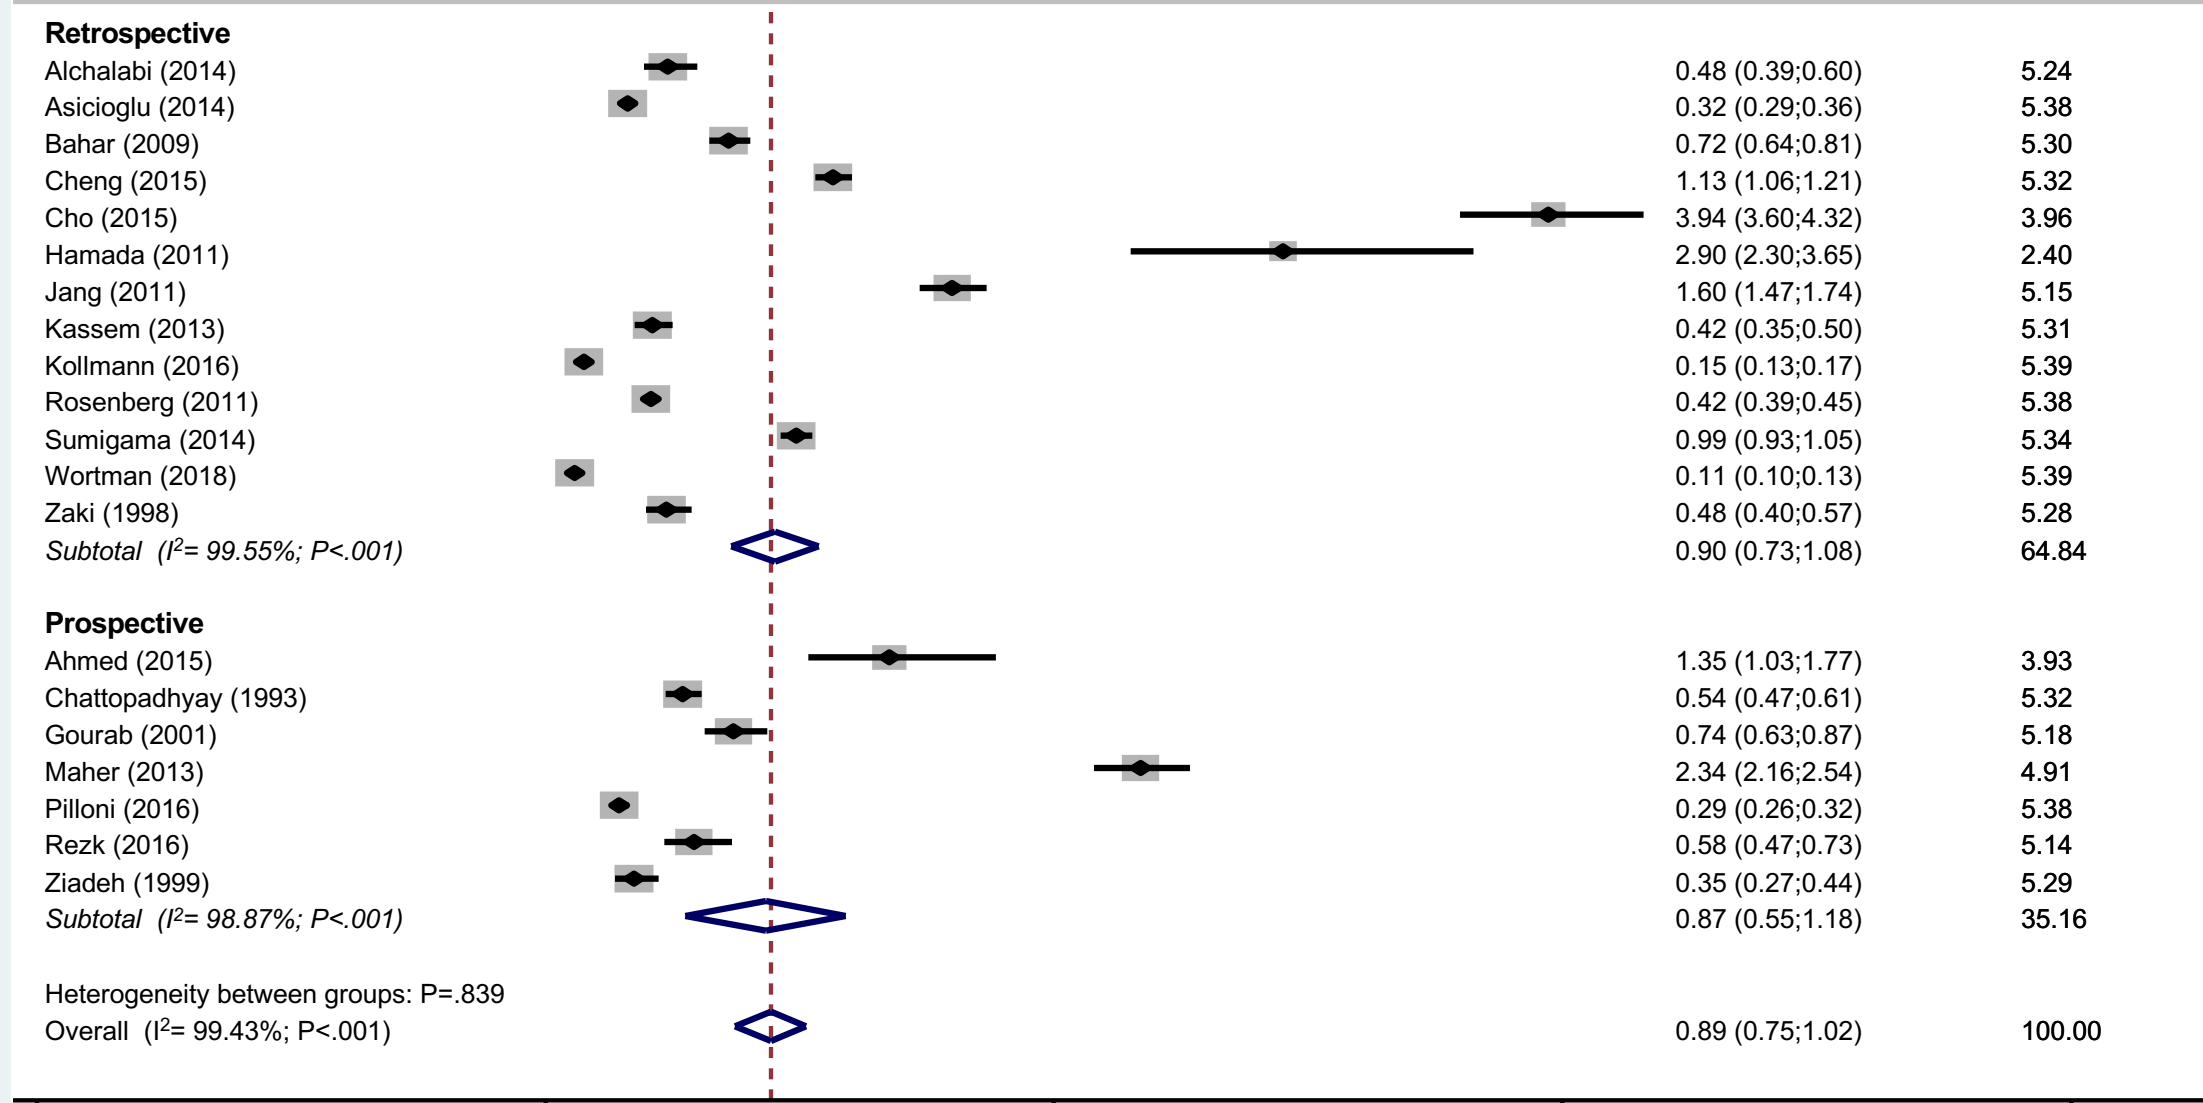

-2 0 1 2 3 4 5 6

1  
2  
3  
4  
5  
6  
7  
8  
9  
10  
11  
12  
13  
14  
15  
16  
17  
18  
19  
20  
21  
22  
23  
24  
25  
26  
27  
28  
29  
30  
31  
32  
33  
34  
35  
36  
37  
38  
39  
40  
41

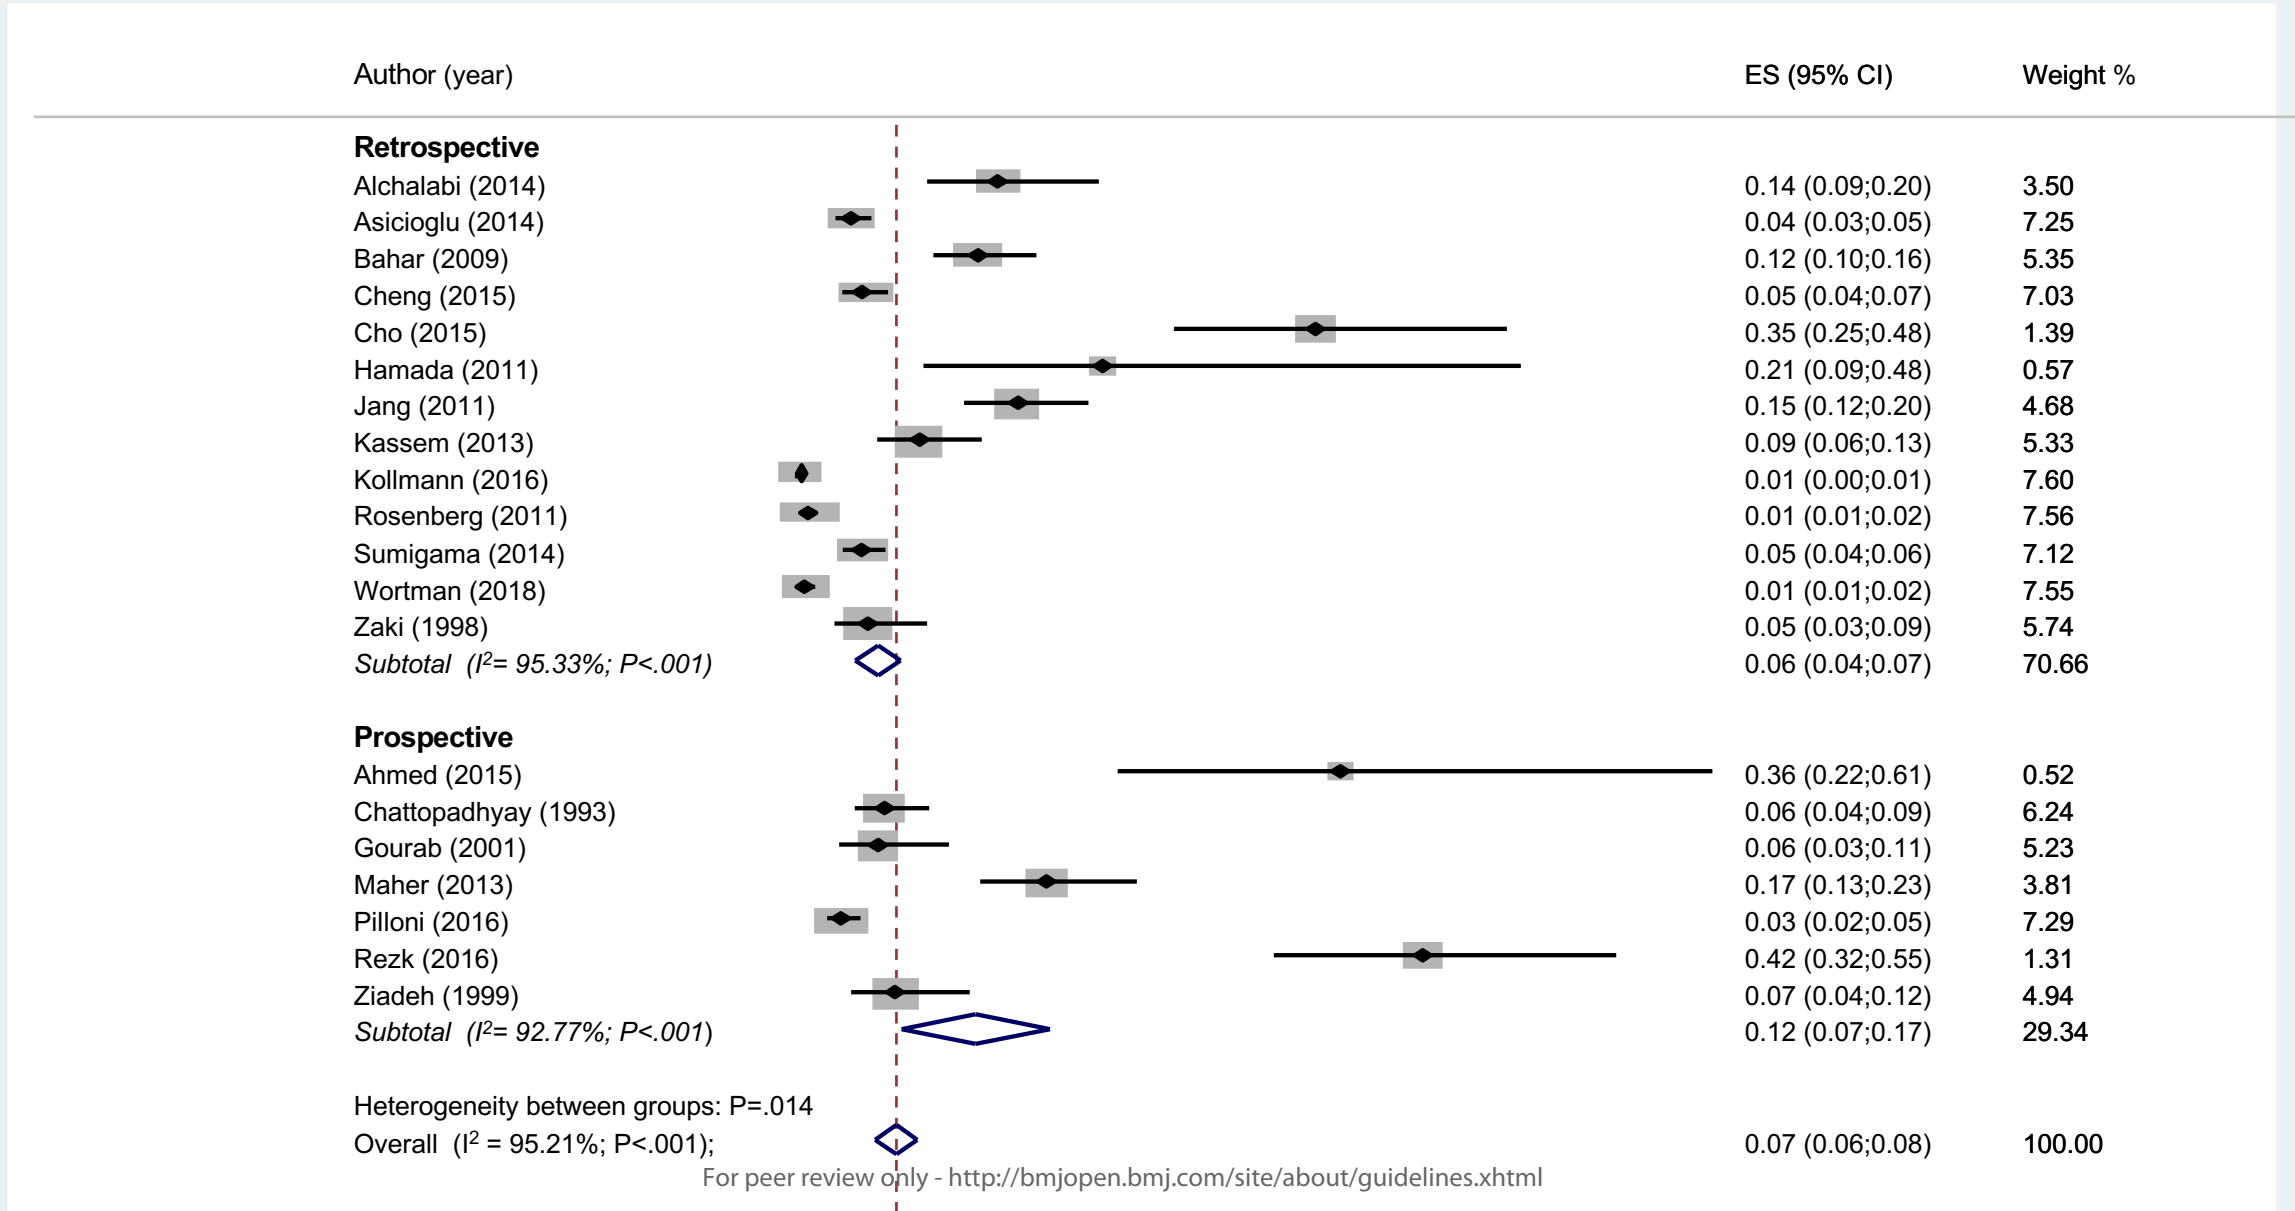

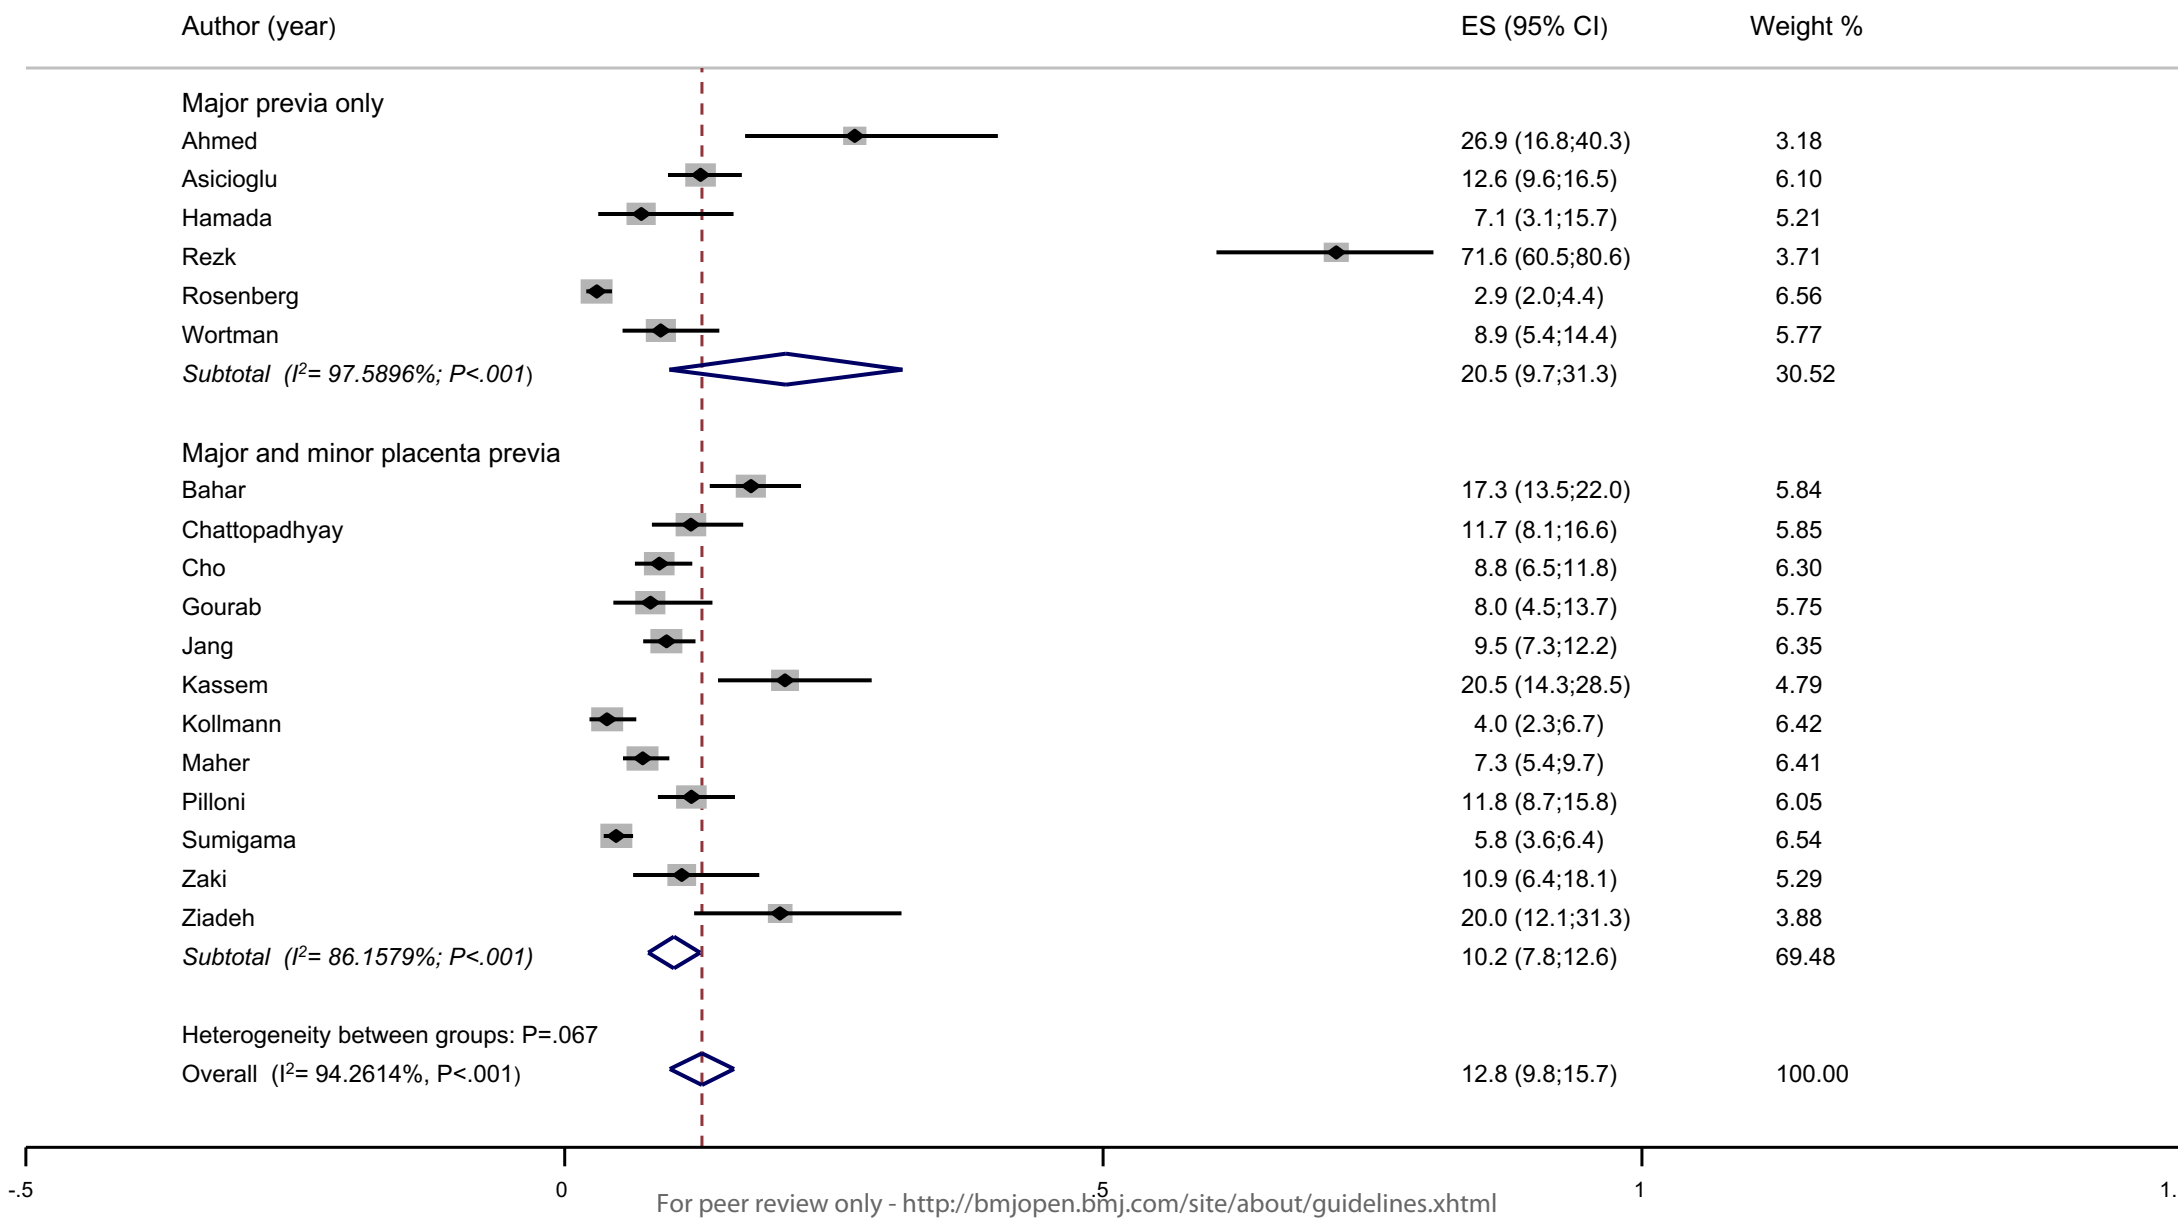

## Appendix Electronic search strategy

**Time period:** August 1982 and September 2018

### **Inclusion Criteria**

- Cohort studies involving women presenting with a singleton pregnancy and placenta previa complicated by accreta placentation diagnosed during the second half of pregnancy and/or at birth.
- Original publication with data on the number of pregnancies, births and/or deliveries in the corresponding population.

### **Exclusion Criteria**

- Reviews, opinions, letters, protocols and conference proceedings.
- Case series and cohorts of less than 50 cases of placenta previa.
- Articles published before 1982.
- Articles in languages other than English.
- Non-human studies.



## MOOSE (Meta-analyses Of Observational Studies in Epidemiology) Checklist

A reporting checklist for Authors, Editors, and Reviewers of Meta-analyses of Observational Studies. You must report the page number in your manuscript where you consider each of the items listed in this checklist. If you have not included this information, either revise your manuscript accordingly before submitting or note N/A.

| Reporting Criteria                                                                                              | Reported (Yes/No) | Reported on Page No. |
|-----------------------------------------------------------------------------------------------------------------|-------------------|----------------------|
| <b>Reporting of Background</b>                                                                                  |                   |                      |
| Problem definition                                                                                              |                   |                      |
| Hypothesis statement                                                                                            |                   |                      |
| Description of Study Outcome(s)                                                                                 |                   |                      |
| Type of exposure or intervention used                                                                           |                   |                      |
| Type of study design used                                                                                       |                   |                      |
| Study population                                                                                                |                   |                      |
| <b>Reporting of Search Strategy</b>                                                                             |                   |                      |
| Qualifications of searchers (eg, librarians and investigators)                                                  |                   |                      |
| Search strategy, including time period included in the synthesis and keywords                                   |                   |                      |
| Effort to include all available studies, including contact with authors                                         |                   |                      |
| Databases and registries searched                                                                               |                   |                      |
| Search software used, name and version, including special features used (eg, explosion)                         |                   |                      |
| Use of hand searching (eg, reference lists of obtained articles)                                                |                   |                      |
| List of citations located and those excluded, including justification                                           |                   |                      |
| Method for addressing articles published in languages other than English                                        |                   |                      |
| Method of handling abstracts and unpublished studies                                                            |                   |                      |
| Description of any contact with authors                                                                         |                   |                      |
| <b>Reporting of Methods</b>                                                                                     |                   |                      |
| Description of relevance or appropriateness of studies assembled for assessing the hypothesis to be tested      |                   |                      |
| Rationale for the selection and coding of data (eg, sound clinical principles or convenience)                   |                   |                      |
| Documentation of how data were classified and coded (eg, multiple raters, blinding, and interrater reliability) |                   |                      |
| Assessment of confounding (eg, comparability of cases and controls in studies where appropriate)                |                   |                      |

| Reporting Criteria                                                                                                                                                                                                                                                           | Reported (Yes/No) | Reported on Page No. |
|------------------------------------------------------------------------------------------------------------------------------------------------------------------------------------------------------------------------------------------------------------------------------|-------------------|----------------------|
| Assessment of study quality, including blinding of quality assessors; stratification or regression on possible predictors of study results                                                                                                                                   |                   |                      |
| Assessment of heterogeneity                                                                                                                                                                                                                                                  |                   |                      |
| Description of statistical methods (eg, complete description of fixed or random effects models, justification of whether the chosen models account for predictors of study results, dose-response models, or cumulative meta-analysis) in sufficient detail to be replicated |                   |                      |
| Provision of appropriate tables and graphics                                                                                                                                                                                                                                 |                   |                      |
| <b>Reporting of Results</b>                                                                                                                                                                                                                                                  |                   |                      |
| Table giving descriptive information for each study included                                                                                                                                                                                                                 |                   |                      |
| Results of sensitivity testing (eg, subgroup analysis)                                                                                                                                                                                                                       |                   |                      |
| Indication of statistical uncertainty of findings                                                                                                                                                                                                                            |                   |                      |
| <b>Reporting of Discussion</b>                                                                                                                                                                                                                                               |                   |                      |
| Quantitative assessment of bias (eg, publication bias)                                                                                                                                                                                                                       |                   |                      |
| Justification for exclusion (eg, exclusion of non-English-language citations)                                                                                                                                                                                                |                   |                      |
| Assessment of quality of included studies                                                                                                                                                                                                                                    |                   |                      |
| <b>Reporting of Conclusions</b>                                                                                                                                                                                                                                              |                   |                      |
| Consideration of alternative explanations for observed results                                                                                                                                                                                                               |                   |                      |
| Generalization of the conclusions (ie, appropriate for the data presented and within the domain of the literature review)                                                                                                                                                    |                   |                      |
| Guidelines for future research                                                                                                                                                                                                                                               |                   |                      |
| Disclosure of funding source                                                                                                                                                                                                                                                 |                   |                      |

Once you have completed this checklist, please save a copy and upload it as part of your submission. DO NOT include this checklist as part of the main manuscript document. It must be uploaded as a separate file.

# BMJ Open

## Epidemiology of Placenta Previa Accreta: A Systematic Review and Meta-analysis

|                                 |                                                                                                                                                                                                                                                                                                                                                                                             |
|---------------------------------|---------------------------------------------------------------------------------------------------------------------------------------------------------------------------------------------------------------------------------------------------------------------------------------------------------------------------------------------------------------------------------------------|
| Journal:                        | <i>BMJ Open</i>                                                                                                                                                                                                                                                                                                                                                                             |
| Manuscript ID                   | bmjopen-2019-031193.R2                                                                                                                                                                                                                                                                                                                                                                      |
| Article Type:                   | Original research                                                                                                                                                                                                                                                                                                                                                                           |
| Date Submitted by the Author:   | 16-Aug-2019                                                                                                                                                                                                                                                                                                                                                                                 |
| Complete List of Authors:       | Jauniaux, Eric; UCL, EGA Institute for Women Health<br>Grønbeck, Lene; University of Copenhagen, Department of Obstetrics, Rigshospitalet<br>Bunce, Catey; kings College london, Primary Care and Public Health Sciences<br>Langhoff-Roos, Jens; Rigshospitalet Infektionsmedicinsk Klinik,<br>Collins, Sally; University of Oxford, Nuffield Department of Women's and Reproductive Health |
| <b>Primary Subject Heading</b>: | Epidemiology                                                                                                                                                                                                                                                                                                                                                                                |
| Secondary Subject Heading:      | Global health, Obstetrics and gynaecology                                                                                                                                                                                                                                                                                                                                                   |
| Keywords:                       | Placenta previa accreta, Prevalence, Incidence, Low-lying placenta, Placenta previa                                                                                                                                                                                                                                                                                                         |
|                                 |                                                                                                                                                                                                                                                                                                                                                                                             |

SCHOLARONE™  
Manuscripts

# Epidemiology of Placenta Previa Accreta: A Systematic Review and Meta-analysis

Eric Jauniaux,<sup>1</sup> Lene Grønbeck,<sup>2</sup> Catey Bunce,<sup>3</sup> Jens Langhoff-Roos,<sup>2</sup> Sally L Collins<sup>4</sup>

## Author affiliations

1. EGA Institute for Women's Health, Faculty of Population Health Sciences, University College London (UCL), London, UK.
2. Department of Obstetrics, Rigshospitalet, University of Copenhagen, Denmark.
3. Statistic unit, School of Population Health and Environmental Sciences, Kings College London, London UK.
4. Nuffield Department of Women's and Reproductive Health, University of Oxford, UK

## Competing interest

*The authors report no conflict of interest.*

## Funding

*No funding was obtained for this study.*

**Key Words:** Placenta accreta spectrum; prevalence; incidence; low-lying placenta; placenta previa.

**Word counts:** Abstract=294; Main text= 3786.

**Corresponding author:** *Professor Eric Jauniaux, EGA Institute for Women's Health, University College London, 86-96 Chenies Mews, London WC1E 6HX, UK.*

Telephone numbers: +44/207/3908113

Fax: +44/207/3908115

E-mail: e.jauniaux@ucl.ac.uk

## ABSTRACT

**Objective** To estimate the prevalence and incidence of placenta previa complicated by placenta accreta spectrum (PAS) and to examine the different criteria being used for the diagnosis.

**Design** Systematic review and meta-analysis.

**Data Sources** PubMed, Google Scholar, clinicalTrials.gov and MEDLINE were searched between August 1982 and September 2018.

**Eligibility Criteria** Studies reporting on placenta previa complicated by PAS diagnosed in a defined obstetric population.

**Data extraction and synthesis** Two independent reviewers performed the data extraction using a predefined protocol and assessed the risk of bias using the Newcastle-Ottawa scale for observational studies, with difference agreed by consensus. The primary outcomes were overall prevalence of placenta previa, incidence of PAS according to the type of placenta previa and the reported clinical outcomes including number of peri-partum hysterectomies and direct maternal mortality. The secondary outcomes included the criteria used for the prenatal ultrasound diagnosis of placenta previa and the criteria used to diagnose and grade PAS at birth.

**Results** A total of 258 articles were reviewed and 13 retrospective and 7 prospective studies were included in the analysis which reported on 587 women with placenta previa and PAS. The meta-analysis indicated a significant ( $P < .001$ ) heterogeneity between study estimates for the prevalence of placenta previa, the prevalence of placenta previa with PAS and the incidence of PAS in the placenta previa cohort. The median prevalence of placenta previa was 0.56% (IQR 0.39;1.24) whereas the median

1  
2  
3 prevalence of placenta previa with PAS was 0.07% (IQR 0.05;0.16). The incidence of  
4  
5 PAS in women with a placenta previa was 11.10% (IQR 7.65;17.35).  
6

7 **Conclusions** The high heterogeneity in qualitative and diagnostic data between studies  
8  
9 emphasizes the need to implement standardized protocols for the diagnoses of both  
10  
11 placenta previa and PAS, including the type of placenta previa and grade of villous  
12  
13 invasiveness.  
14  
15

16  
17  
18  
19 PROSPERO Registration CRD42017068589  
20  
21  
22

### 23 24 **Strengths and limitations of this study**

- 25  
26 • This study provides the first comprehensive evaluation of the epidemiology of  
27  
28 placenta previa complicated by PAS.  
29  
30
- 31  
32 • The search was performed using predetermined eligibility criteria in a defined  
33  
34 obstetric population.  
35
- 36  
37 • Thirteen out of 20 studies included in the study were retrospective limiting the  
38  
39 overall quality of the analysis.  
40
- 41  
42 • Only six studies provided data on the prenatal ultrasound diagnosis of PAS in  
43  
44 patients with placenta previa and nine studies on detailed histopathological  
45  
46 findings.  
47
- 48  
49 • High level of inconsistency between estimates in prevalence and incidence did  
50  
51 not allow for full meta-analysis of the clinical outcomes.  
52  
53  
54  
55  
56  
57  
58  
59  
60

## INTRODUCTION

Placenta accreta is a pathological condition of placentation associated with a high risk of massive obstetric hemorrhage during delivery. Initially described in 1937 by Irving and Hertig<sup>1</sup> as the abnormal adherence of the placenta to the myometrium due to the partial or complete absence of decidua basalis, it was subsequently redefined by Lukes et al<sup>2</sup> as a spectrum of abnormally adherent and invasive placentation disorders. Placenta accreta is now graded according to the depth of the villous penetration into the uterine wall starting with the abnormally adherent placenta or creta, where the villi attach directly to the surface of the myometrium without invading it, and extending to the invasive grades of placenta increta, where the villi penetrate deeply into the myometrium up to the uterine serosa, and placenta percreta, where the invasive villous tissue penetrates through the uterine serosa often entering the surrounding pelvic tissues.<sup>3-5</sup> The different grades of the placenta accreta spectrum (PAS) can co-exist in the same specimen and can be focal (just a small area of the placental bed) or extensive (including much of the placental bed).<sup>2</sup>

Over the last two decades, a growing body of epidemiology research has identified the effect of the rapid increase in caesarean delivery rates on the risks of PAS.<sup>6-10</sup> The main additional risk factor after a previous caesarean delivery is placenta previa. A large multicentric U.S. cohort study noted that for women presenting with placenta previa and prior caesarean delivery, the risk of PAS was 3%, 11%, 40%, 61%, and 67% for first, second, third, fourth, and fifth or more cesarean deliveries, respectively.<sup>7</sup> A national case-control study using the UK Obstetric Surveillance System found that the incidence of PAS increases from 1.7 per 10,000 births overall to 577 per

1  
2  
3 10,000 births in women with both a previous caesarean delivery and placenta previa.<sup>8</sup>  
4

5 Both abnormal adherence and invasion of villous tissue into the myometrium result  
6 in failure of the placenta to separate spontaneously from the uterine wall at delivery.<sup>2-4</sup>  
7  
8 When unsuspected at the time of delivery, attempts to manually remove accreta villous  
9 tissue typically provoke rapid bleeding from the utero-placental circulation.<sup>5,11</sup> In invasive  
10 cases, this can lead to massive obstetric hemorrhage due to the disruption of the deep  
11 uterine vasculature of the increta or percreta area.<sup>4,5</sup> Not surprisingly, prenatal diagnosis  
12 of PAS has been shown to decrease maternal morbidity and mortality, and has thus  
13 become essential in improving its management.<sup>12,13</sup> Tabsh et al were the first in 1982 to  
14 report on the prenatal ultrasound diagnosis of a case of placenta increta.<sup>14</sup> A recent  
15 systematic review and meta-analysis of prenatal ultrasound diagnosis of placenta previa  
16 with PAS in women with a history of caesarean delivery has found that the overall  
17 diagnostic accuracy of ultrasound in specialist units is in 90.9%.<sup>15</sup> However, in countries  
18 with well-established screening programs for fetal anomalies, over half the cases of PAS  
19 are not diagnosed before delivery.<sup>8,10</sup>  
20  
21  
22  
23  
24  
25  
26  
27  
28  
29  
30  
31  
32  
33  
34  
35  
36

37 Accreta placentation and in particular its invasive forms are impacting maternal  
38 health outcomes globally and its prevalence is likely to increase. Women with a history  
39 of previous caesarean delivery presenting with placenta previa complicated by PAS in  
40 an ongoing pregnancy are now the cohort of obstetric patients with the highest risk of  
41 delivery complications<sup>16</sup>, however, their epidemiology has not been comprehensively  
42 reviewed yet. Health provision for the development of maternity centres with specialist  
43 teams, equipment, drugs, blood bank and intensive care infrastructure to safely manage  
44 women presenting with placenta previa and PAS requires an accurate evaluation of its  
45  
46  
47  
48  
49  
50  
51  
52  
53  
54  
55  
56  
57  
58  
59  
60



1  
2  
3 epidemiology. The objective of this meta-analysis is to review the epidemiology of  
4  
5 women presenting with placenta previa and to examine the different criteria used by the  
6  
7 authors of cohort studies to diagnose placenta previa and PAS prenatally and to confirm  
8  
9 the diagnosis of PAS at birth.  
10  
11  
12  
13

## 14 **MATERIALS AND METHODS**

15  
16  
17 A systematic review was undertaken of articles providing data on prevalence and  
18  
19 incidence of PAS in women presenting with a placenta previa where the populations  
20  
21 sampled were defined. PubMed, Google Scholar, clinicalTrials.gov and MEDLINE were  
22  
23 searched for studies published between the first prenatal ultrasound description of  
24  
25 placenta accreta in August 1982 by Tabsh<sup>14</sup> et al and September 2018. The search  
26  
27 protocol was designed *a priori* and registered on PROSPERO (CRD42017068589). The  
28  
29 overall search strategy was inclusive of MeSH headings for “placenta accreta, placenta  
30  
31 increta, placenta percreta, abnormally invasive placenta, morbidly adherent placenta  
32  
33 and major placenta previa” which were combined with terms including “prevalence,  
34  
35 incidence, obstetric hysterectomy and caesarean hysterectomy”. Title, abstracts and  
36  
37 full-text were independently assessed by the authors for content, data extraction and  
38  
39 analysis. Additional relevant studies were identified from reference lists of reviews and  
40  
41 editorials and by hand-searching key journals and websites. All search results were  
42  
43 combined in a reference database. Duplicates were removed by hand. The search was  
44  
45 limited to articles published in English.  
46  
47  
48  
49  
50  
51

52 Two independent investigators (EJ and LG) selected studies in two stages. The  
53  
54 abstracts of all potentially relevant papers were individually examined for suitability.  
55  
56  
57  
58  
59  
60

1  
2  
3 Papers were only ruled out at this stage if they obviously did not meet the inclusion  
4  
5 criteria. The remainder were obtained in full text and were independently assessed  
6  
7 for content, data extraction and analysis. Disagreements between the two original  
8  
9 reviewers were resolved by discussion with the third investigator (JLR). Articles were  
10  
11 excluded if; they were published before August 1982, contained no data on the study  
12  
13 population such as the overall pregnancies, births and/or deliveries numbers, were case  
14  
15 reports or were overlapping.  
16  
17

18  
19 Study characteristics were extracted using a predesigned data extraction  
20  
21 protocol including: author institution, year of publication, country of origin, study period,  
22  
23 study type (retrospective, single institution, multiple institutions), total number of cases  
24  
25 in the study population, type of placenta previa, diagnosis of PAS at birth (Appendix 1).  
26  
27 Outcome measures included the need to perform a peripartum hysterectomy and direct  
28  
29 maternal mortality. Prior surgical history was also recorded. The reference standard for  
30  
31 differential diagnosis between minor and major placenta previa was recorded based on  
32  
33 the placental position inside the uterine cavity on transvaginal ultrasound with relation to  
34  
35 the internal cervical os. For the diagnosis of accreta placentation, we referred to the  
36  
37 clinical grading based on surgical findings at delivery as previously described<sup>17</sup> and to  
38  
39 histopathologic findings when a caesarean hysterectomy was performed i.e. placental  
40  
41 villi directly attached to the myometrium without interposing decidua or invading the  
42  
43 uterine wall.  
44  
45  
46  
47  
48

49 Two independent reviewers (EJ and LG) undertook the quality assessment with  
50  
51 difference agreed by consensus. The Newcastle-Ottawa scale for observational studies  
52  
53 was used to establish the risk of bias in selection (representativeness of the exposed  
54  
55  
56  
57  
58  
59  
60

1  
2  
3 cohort, ascertainment of exposure and the demonstration that the outcome of interest  
4 was not present at the start of the study), comparability (evaluation of the cohorts  
5 based on the design or analysis), and outcome assessment.<sup>18</sup> These included  
6 retrospective versus prospective studies, single versus multiple institutions studies,  
7 prenatal ultrasound description of low-lying/placenta previa and PAS, histopathologic  
8 confirmation of the diagnosis of the PAS and corresponding grade of invasiveness and  
9 detailed data on management and maternal outcomes. Studies that scored four stars for  
10 selection, two stars for comparability, and three stars for ascertainment of the outcome  
11 were regarded to have a low risk of bias. Studies with two or three stars for selection,  
12 one for comparability, and two for outcome ascertainment were considered to have a  
13 medium risk of bias. We deemed any study with a score of one for selection or outcome  
14 ascertainment, or zero for any of the three domains, to have a high risk of bias. No  
15 study was excluded based on the risk of bias assessment.

16  
17  
18  
19  
20  
21  
22  
23  
24  
25  
26  
27  
28  
29  
30  
31  
32  
33 Analyses were conducted using STATA software (version 15; StataCorp, College  
34 Station, TX). Standard Kurtosis analysis indicated that some values were not normally  
35 distributed and study specific estimates are therefore presented as median and  
36 interquartile range (IQR). A random effects model was used to combine the studies  
37 while incorporating variations among studies unless there were three or less studies  
38 contributing to the meta-analysis in which case a fixed effect model was used. Statistical  
39 heterogeneity was assessed with the Cochran's Q-test and the  $I^2$  statistic (the  
40 proportion of variation in study estimates because of heterogeneity rather than sampling  
41 error). Forest plots are presented to graphically summarize the study results and the  
42 pooled results. A test for heterogeneity between sub-groups (i.e. study types) was  
43  
44  
45  
46  
47  
48  
49  
50  
51  
52  
53  
54  
55  
56  
57  
58  
59  
60

1  
2  
3 conducted.

## 4 5 **Patients and public involvement**

6  
7  
8 Patients and the public were not involved in the design or planning of the study.  
9

## 10 11 **RESULTS**

12  
13  
14 The initial search provided 256 records with cross-referencing providing an additional  
15  
16 two studies, making a total of 258 potentially relevant articles. After exclusion of  
17  
18 duplicates and the two which were not available (Figure 1), 220 remained. On screening  
19  
20 the titles and abstracts, a further 162 were excluded as the reported outcomes were not  
21  
22 relevant, leaving 58 studies which were obtained for full text review. An additional 38  
23  
24 articles were excluded after full review including letters (n=16), narrative reviews (n= 10)  
25  
26 commentaries (n= 9), conference proceedings (n= 2) and duplication of data in another  
27  
28 publication (n=1), leaving 20 articles for the final analysis.<sup>19-38</sup>  
29  
30  
31

32  
33 The characteristics and the results of the quality assessment are displayed in  
34  
35 table 1. There were 13 retrospective<sup>19,20,23,25-27,29-31,33-35,38</sup> and 7  
36  
37 prospective<sup>21,22,24,28,32,36,37</sup> studies including a total of 1,207,296 births and 23,864 cases  
38  
39 referred as pregnancies. There were 15 studies from a single institution<sup>19-24,27-30,32-34,37,38</sup>  
40  
41 and five from multiple institutions<sup>25,31</sup> or a geographical region.<sup>26,35,36</sup> Overall, 18 studies  
42  
43 had low or medium risk of bias.  
44  
45

46  
47 Table 2 presents the epidemiology data of the 20 studies. These studies included  
48  
49 587 women with placenta previa complicated by PAS out of 6,628 cases of placenta  
50  
51 previa. The median prevalence of placenta previa in the 20 studies was 0.56% (IQR  
52  
53 0.39;1.24) whereas the median prevalence of placenta previa with PAS was 0.07%  
54  
55  
56  
57  
58  
59  
60

1  
2  
3 (IQR 0.05;0.16). The median incidence of PAS in women with a placenta previa was  
4  
5 11.10% (IQR 7.65;17.35).  
6

7  
8 All authors except two<sup>29,33</sup> reported on the criteria used for the prenatal  
9  
10 ultrasound diagnosis of placenta previa. Six studies<sup>24,26,30,32,37,38</sup> only included major  
11  
12 placenta previa in their cohort as defined as the placenta completely covering or  
13  
14 partially covering the internal os of the cervix. The others included both major and minor  
15  
16 placenta previa. The definition of minor placenta previa varied with two studies<sup>31,36</sup> using  
17  
18 the placental edge being <2cm from the internal os, two studies using < 3cm<sup>22,23</sup> and  
19  
20 one study using <3 cm or <5 cm if associated with abnormal fetal presentation.<sup>21</sup> The  
21  
22 gestational age at confirmation of the prenatal diagnosis of placenta previa was  
23  
24 reported in six studies<sup>22,23,24,28,32,37</sup> and ranged between 20 weeks and 34 weeks and in  
25  
26 one study the diagnosis of placenta previa was confirmed at birth when the placenta  
27  
28 was found to be inserted in the lower segment.<sup>19</sup>  
29  
30  
31  
32

33 The ultrasound diagnostic signs for PAS were reported in six studies<sup>24,28,30,32,36,37</sup>  
34  
35 with two studies also reporting on the use of magnetic resonance imaging.<sup>29,38</sup> The  
36  
37 clinical criteria used for the diagnosis of PAS at birth were reported by nine  
38  
39 studies<sup>19,20,23,27,28,30,33,36,37</sup> and included a difficult delivery of the placenta without easy  
40  
41 separation uterine wall or requiring a “piecemeal removal” associated with heavy  
42  
43 bleeding and excessive bleeding from the placental bed after placental delivery. One  
44  
45 author described the presence of invasive villous tissue at delivery<sup>27</sup> and one the need  
46  
47 to suture the placental bed.<sup>23</sup> None of the other authors reported on the gross  
48  
49 appearance of the uterus or surgical findings at the time of caesarean delivery. In 12  
50  
51 studies<sup>19,23,24,27-31,33,34,36,37</sup> the prenatal and/or clinical diagnosis was confirmed by  
52  
53  
54  
55  
56  
57  
58  
59  
60

1  
2  
3 histopathological examination with detailed description of the microscopic criterion only  
4 reported in six<sup>19,27,28,30,31,37</sup>. Detailed histopathological findings on the depth of villous  
5  
6 invasiveness were reported in nine studies<sup>24,27-29,31,33,34,36,37</sup> out of the 20 studies (Table  
7  
8 3). These included 283 cases of placenta previa accreta graded for 171 (60.4%) as  
9  
10 placenta creta (adherent), 74 (26.2%) as placenta increta and 38 (13.4%) as placenta  
11  
12 percreta.  
13  
14  
15

16  
17 The meta-analysis indicated statistically significant ( $P<.001$ ) level of overall  
18  
19 heterogeneity between study estimates for the prevalence of placenta previa (Figure 2),  
20  
21 the prevalence of placenta previa with PAS (Figure 3) and the incidence of PAS in the  
22  
23 placenta previa cohort (Figure 4). There was strong evidence of inconsistency between  
24  
25 study types with  $I^2$  values greater 85%. The difference in heterogeneity between  
26  
27 prospective versus retrospective studies was not statistically significantly ( $P=.839$ )  
28  
29 different (Figure 2) whereas it was significant ( $P=.014$ ) for the prevalence of placenta  
30  
31 previa accreta (Figure 3). Adjusting for type of study (prospective versus retrospective)  
32  
33 did not reduce inconsistency between studies. The in-between placenta previa major  
34  
35 only versus minor and major placental previa was not significant ( $P=.067$ ) for the  
36  
37 incidence of PAS in patient with placenta previa (Figure 4).  
38  
39  
40  
41

42 All authors but two<sup>22,23</sup> reported on prior surgical history including  
43  
44 caesarean section<sup>19-21,24-38</sup>, uterine curettage<sup>28,30-32,34,37,38</sup> and myomectomy.<sup>28,36,37</sup> Data  
45  
46 on surgical management was available in 14 out of the 20 studies<sup>19,20,23,27-31,33-38</sup> with  
47  
48 314 out of 441 women presenting with a placenta previa complicated by PAS. The  
49  
50 median peri-partum hysterectomy rate of 69.2% (IQR 50.0;84.0). Data on maternal  
51  
52  
53  
54  
55  
56  
57  
58  
59  
60

1  
2  
3 mortality were available in 13 studies<sup>19-21,23,25,27-30,32,35,37,38</sup> and PAS accounted for 5  
4  
5 maternal deaths<sup>19,20,25,29,30</sup> out of 387 (1.3%) cases of placenta previa with PAS.  
6  
7  
8  
9

## 10 **DISCUSSION**

11  
12 This study provides a comprehensive evaluation of the prevalence of placenta previa  
13 complicated by PAS and the incidence of PAS in women presenting with a placenta  
14 previa. Women with a prior history of caesarean delivery presenting with a low-  
15 lying/placenta previa represent more than 90% of the cases of PAS.<sup>8,10,16</sup> The meta-  
16  
17 analysis indicates high heterogeneity for both the prenatal diagnosis of placenta previa  
18 and for the confirmation of the diagnosis of PAS at delivery. These findings highlight the  
19 need to use international standardized clinical protocols for the screening and  
20 management of this complex obstetric condition. The current situation limits the capacity  
21 building of healthcare providers on improvements in training, implementation of  
22 guidelines and changes in clinical practice behaviour.  
23  
24  
25  
26  
27  
28  
29  
30  
31  
32  
33  
34  
35

36 Defining the position of the placenta inside the uterus was one of the first aims of  
37 obstetric ultrasound examination.<sup>39,40</sup> Following the development of real-time ultrasound  
38 imaging, placental location became an integral part of the mid-pregnancy ultrasound  
39 examination.<sup>41</sup> Placenta previa was initially described with transabdominal scan as a  
40 placenta developing within the lower uterine segment and classified according to the  
41 relationship and/or the distance between the lower placental edge and the internal os of  
42 the uterine cervix i.e. minor placenta previa when lower edge is inside the lower uterine  
43 segment down to the internal os and major placenta previa when the placenta covers the  
44 cervix. Minor placenta previa can be further subdivided into low-lying placenta when the  
45  
46  
47  
48  
49  
50  
51  
52  
53  
54  
55  
56  
57  
58  
59  
60

1  
2  
3 lower edge does not reach the internal os and marginal placenta previa when it does.  
4  
5 Major placenta previa can also be described as partial or complete depending on the  
6  
7 amount of placental tissue covering the cervix. The use of transvaginal scanning has  
8  
9 allowed for a more precise evaluation of the distance between the placental edge and the  
10  
11 internal os<sup>42,43</sup> but as demonstrated in our meta-analysis, the reporting of the ultrasound  
12  
13 criteria used for the diagnosis of placenta previa has been heterogenous. In addition, we  
14  
15 found also wide variation in the gestational age at diagnosis. The timing of the  
16  
17 confirmation of the diagnosis has a direct impact on epidemiology data as up to 70% of  
18  
19 minor placenta previa at 20-23 weeks of gestation will resolve by 32-35 weeks.<sup>44,45</sup> An  
20  
21 expert panel of the American Institute of Ultrasound in Medicine<sup>46</sup> has recently  
22  
23 recommended ceasing the use of the terms 'partial' and 'marginal' and using the term  
24  
25 'placenta previa' only when the placenta lies directly over the internal os. The placenta  
26  
27 should be reported as 'low lying' when the placental edge is less than 2 cm from the  
28  
29 internal os and as normal when the placental edge is more than 2 cm from the internal  
30  
31 os. The findings of our meta-analysis highlight the need for the use of such a classification  
32  
33 in further studies.  
34  
35  
36  
37  
38  
39

40 Only six of the 20 studies included in the present meta-analysis provided data on  
41  
42 the prenatal ultrasound diagnosis of PAS in patients with placenta previa. We included  
43  
44 in the systematic review all studies published since the first ultrasound description of  
45  
46 PAS by Tabsh et al in 1982.<sup>14</sup> We found no studies between 1982 and 1993 (Table 1)  
47  
48 which corresponds to the time when high-resolution grey-scale ultrasound imaging  
49  
50 became widely available. Colour-Doppler imaging was introduced for the diagnosis of  
51  
52 PAS in 1992<sup>47</sup>, however the sensitivity and specificity of grey-scale imaging alone in  
53  
54  
55  
56  
57  
58  
59  
60



1  
2  
3 diagnosing for placenta previa accreta are high when performed by experience  
4  
5 operators.<sup>15</sup> These findings indicate that the prenatal diagnosis of PAS can be  
6  
7 performed using standard ultrasound equipment. Unlike placenta previa which is  
8  
9 routinely screened for at the time of the fetal anomaly scan, PAS is currently not  
10  
11 screened for and the data available on the prenatal diagnosis of the condition come  
12  
13 exclusively from specialist centres.<sup>16</sup> In these centres, the diagnostic accuracy of  
14  
15 ultrasound imaging is over 90%, but similar to placenta previa, the description of the  
16  
17 ultrasound signs used for the diagnosis of PAS has also been highly variable over the  
18  
19 last two decades.<sup>47,48</sup> The European Working Group on Abnormally Invasive Placenta  
20  
21 and the Abnormally Invasive Placenta international expert group have recently  
22  
23 proposed standardised descriptions of the ultrasound signs used for the prenatal  
24  
25 diagnosis and a protocol for the ultrasound assessment of PAS.<sup>49,50</sup> The use of these  
26  
27 protocols in prospective studies should also facilitate the screening of patients at high  
28  
29 risk of PAS and in particular those with multiple prior caesarean deliveries presenting  
30  
31 with a low-lying or placenta previa.<sup>51</sup>

32  
33  
34  
35  
36  
37  
38 We found significant heterogeneity in the qualitative definition and diagnosis of  
39  
40 PAS at birth among the nine studies that provided a description of the clinical  
41  
42 findings.<sup>19,20,23,27,28,30,33,36,37</sup> Only one of these studies described the invasive  
43  
44 appearance of placental tissue at delivery<sup>27</sup> whereas the others reported a difficult  
45  
46 delivery of the placenta without easy separation from the uterine wall or requiring a  
47  
48 “piecemeal removal” associated with heavy bleeding as diagnostic of PAS. These  
49  
50 clinical criteria were first described by Irving and Hertig<sup>1</sup> in 1937 who did not have  
51  
52 invasive cases in their cohort limiting their definition to abnormally adherent placenta  
53  
54  
55  
56  
57  
58  
59  
60

1  
2  
3 and not to placenta increta or percreta. This definition also fails to clearly differentiate  
4  
5 between abnormal adherence and placental retention as both present with similar  
6  
7 clinical symptoms and etiology<sup>52</sup> leading to possible over diagnosis of placenta previa  
8  
9 accreta. Similarly, the finding of excessive bleeding from the placental bed after delivery  
10  
11 of the placenta is a common complication of non-accreta placenta previa due to the  
12  
13 implantation of the placenta in the lower uterine segment which contains less muscular  
14  
15 fibers than the upper segment and is often thinner and dehiscent after multiple  
16  
17 caesarean deliveries.  
18  
19  
20

21  
22 Detailed histopathologic reports can only be obtained in those patients who have  
23  
24 a hysterectomy or a partial myometrial resection and thus in many studies there is not  
25  
26 histopathologic confirmation of the clinical diagnosis. The main histological diagnostic  
27  
28 criteria of accreta placentation i.e. absence of decidua between the tip of anchoring villi  
29  
30 and the superficial myometrium, is found with increasing incidence with advancing  
31  
32 gestation in pregnancies with no clinical evidence of PAS.<sup>5</sup> Thus the combination of  
33  
34 clinical criteria that do not differentiate between placenta retention and adherent accreta  
35  
36 and the use of non-diagnostic criteria of villous invasiveness may result in the over-  
37  
38 diagnosis of the adherent grade of PAS (Table 3), in particular in those studies reporting  
39  
40 a low rate of caesarean hysterectomy.<sup>28,36</sup> Overall, this can explain the wide range in  
41  
42 the prevalence (0.04 to 0.42%) of placenta previa with PAS and incidence (2.9 to  
43  
44 71.6%) of PAS in women presenting with placenta previa (Figures 3 and 4).  
45  
46  
47  
48

49  
50 Overall, management strategies and outcomes will vary depending on the  
51  
52 accuracy of prenatal diagnosis, local surgical expertise and more recently access to a  
53  
54 centre of excellence with multidisciplinary team approach.<sup>53,54</sup> In cases of high suspicion  
55  
56  
57  
58  
59  
60

1  
2  
3 of PAS during cesarean delivery, 60-70% of obstetricians-gynecologists proceed with a  
4 peripartum hysterectomy.<sup>55,56</sup> By contrast with a conservative management approach,  
5 radical surgery is often considered to be safer, in particular in cases of invasive  
6 placentation.<sup>57</sup> The association between a placenta previa and a PAS increases the  
7 risks of both maternal morbidity and mortality. In the present study we found that a  
8 caesarean hysterectomy was the primary management option in around 70% of the  
9 patients presenting with a placenta previa and PAS. The inter-study range was wide  
10 with four studies<sup>19,21,29,37</sup> reporting peripartum hysterectomy rates < 50%, five<sup>28,31,32,34,36</sup>  
11 had rates between 50-99% and four<sup>22,30,35,38</sup> had rates of 100%. This may be due to  
12 difference in study protocols, local expertise and the impact of prenatal diagnosis on  
13 management strategies but also as suggested by our analysis to difference in the rates  
14 of the different grades of PAS and the accuracy of clinical diagnosis at birth and detailed  
15 histopathologic examination confirming the diagnosis.

16  
17  
18  
19  
20  
21  
22  
23  
24  
25  
26  
27  
28  
29  
30  
31  
32  
33 The main limitations of this review are the quality of the published data. Thirteen  
34 out of 20 studies included in the analysis studies were retrospective and there was wide  
35 variation in the use of different ultrasound criteria for the prenatal diagnosis of placenta  
36 previa, in the clinical diagnosis of PAS at delivery and in the authors providing detailed  
37 histopathology data to confirm the clinical diagnosis. This is hampering the meta-  
38 analysis of the clinical outcomes in particular the incidence of major hemorrhage at  
39 delivery and the need and amount of blood transfusion but also the choice in  
40 management protocols and in particular the use of conservative management  
41 procedures. We would not, therefore, recommend the use of the pooled estimates  
42 beyond that of a support towards the development of standardized diagnostic protocols.

1  
2  
3 The prevalence of PAS in the general population of women giving birth varies  
4 widely.<sup>8,10,58,59</sup> A systematic review and meta-analysis of the prevalence of placenta  
5  
6  
7  
8  
9  
10  
11  
12  
13  
14  
15  
16  
17  
18  
19  
20  
21  
22  
23  
24  
25  
26  
27  
28  
29  
30  
31  
32  
33  
34  
35  
36  
37  
38  
39  
40  
41  
42  
43  
44  
45  
46  
47  
48  
49  
50  
51  
52  
53  
54  
55  
56  
57  
58  
59  
60

The prevalence of PAS in the general population of women giving birth varies widely.<sup>8,10,58,59</sup> A systematic review and meta-analysis of the prevalence of placenta praevia has found evidence suggestive of regional variation.<sup>60</sup> As both conditions are often associated with prior caesarean sections it is likely that national and local caesarean delivery rates, expertise in diagnosing both conditions antenatally and access to perinatal pathologist to confirm the diagnosis of PAS at birth will influence these epidemiology data. There is a need for further prospective multi-centre studies with participatory methodologies involving local service providers and facility management to accurately evaluate the consequences of high caesarean sections rates on maternal health within a particular population. Within this context, accurate epidemiologic data on PAS disorders are essential in planning screening programs and in making provision for the development of centres of excellence for the management of this increasingly common complex obstetric condition. Whilst the concept of core outcome measures within clinical trials is now well recognised and championed, greater efforts are required to disseminate this approach in epidemiological research to facilitate global estimation and recognition of problems emerging on a worldwide scale. Our study supports implementation, in both clinical practice and in reporting data on placenta previa accreta in the medical literature, of standardized protocols for prenatal diagnosis of both placenta previa and PAS, for the clinical diagnosis of PAS at birth and for the histopathologic confirmation examination.

## Author contributions

EJ, CB and JLR contributed equally to the study design. EJ, LG and JLR collected the data and carried out the qualitative analysis. CB and EJ carried out the quantitative

1  
2  
3 analysis. EJ, JLR and SC drafted the manuscript. All authors were involved in the critical  
4 discussion and approved this final version for publication. EJ is the guarantor of the study.  
5  
6  
7  
8  
9

## 10 **Data sharing statement**

11  
12 Data relevant to the study are available from the Dryad digital repository

13  
14  
15 doi:10.5061/dryad.5ds4833  
16  
17  
18  
19

## 20 **REFERENCES**

- 21  
22  
23  
24 1. Irving C, Hertig AT. A study of placenta accreta. *Surgery, Gynecol Obstet*  
25 1937;64:178-200.  
26  
27  
28 2. Luke RK, Sharpe JW, Greene RR. Placenta accreta: The adherent or invasive  
29 placenta. *Am J Obstet Gynecol* 1966;95:660–8.  
30  
31  
32 3. Jauniaux E, Jurkovic D. Placenta accreta: pathogenesis of a 20th century  
33 iatrogenic uterine disease. *Placenta*. 2012;33:244-51.  
34  
35  
36 4. Jauniaux E, Bhide A, Burton GJ. Pathophysiology of accreta. In: Silver, R. ed.  
37 *Placenta accreta syndrome*. Portland: CRC Press; 2017:13–28.  
38  
39  
40 5. Jauniaux E, Collins SL, Burton GJ. Placenta accreta spectrum: Pathophysiology  
41 and evidence-based anatomy for prenatal ultrasound imaging. *Am J Obstet*  
42 *Gynecol*. 2018;218:75-87.  
43  
44  
45 6. Wu S, Kocherginsky M, Hibbard JU. Abnormal placentation: twenty-year  
46 analysis. *Am J Obstet Gynecol*. 2005;192:1458–61.  
47  
48  
49  
50  
51  
52  
53  
54  
55  
56  
57  
58  
59  
60

- 1  
2  
3 7. Silver RM, Landon MB, Rouse DJ, Leveno KJ, Spong CY, Thom EA, et al.;  
4  
5 National Institute of Child Health and Human Development Maternal-Fetal  
6  
7 Medicine Units Network. Maternal morbidity associated with multiple repeat  
8  
9 cesarean deliveries. *Obstet Gynecol* 2006;107:1226–32.
- 10  
11  
12 8. Fitzpatrick KE, Sellers S, Spark P, Kurinczuk JJ, Brocklehurst P, Knight M.  
13  
14 Incidence and risk factors for placenta accreta/increta/percreta in the UK: a  
15  
16 national case-control study. *PLoS One*. 2012;7:e52893.
- 17  
18  
19 9. Bowman ZS, Eller AG, Bardsley TR, Greene T, Varner MW, Silver RM. Risk  
20  
21 Factors for Placenta Accreta: A Large Prospective Cohort. *Am J Perinatol*.  
22  
23 2014;31:799-804.
- 24  
25  
26 10. Thurn L, Lindqvist PG, Jakobsson M, Colmorn LB, Klungsoyr K, Bjarnadóttir RI,  
27  
28 et al. Abnormally invasive placenta-prevalence, risk factors and antenatal  
29  
30 suspicion: results from a large population-based pregnancy cohort study in the  
31  
32 Nordic countries. *BJOG*. 2016;123:1348-55.
- 33  
34  
35 11. Silver RM, Branch DW. Placenta Accreta Spectrum. *N Engl J Med*.  
36  
37 2018;378:1529-36.
- 38  
39  
40 12. Chantraine F, Braun T, Gonser M, Henrich W, Tutschek B. Prenatal diagnosis of  
41  
42 abnormally invasive placenta reduces maternal peripartum hemorrhage and  
43  
44 morbidity. *Acta Obstet Gynecol Scand*. 2013;92:439-44.
- 45  
46  
47 13. Hall T, Wax JR, Lucas FL, Cartin A, Jones M, Pinette MG. Prenatal sonographic  
48  
49 diagnosis of placenta accreta: Impact on maternal and neonatal outcomes. *J Clin*  
50  
51 *Ultrasound*. 2014;42:449-55.
- 52  
53  
54 14. Tabsh KM, Brinkman CR 3rd, King W. Ultrasound diagnosis of placenta increta. *J*  
55  
56  
57  
58  
59  
60

- 1  
2  
3 Clin Ultrasound. 1982;10:288-90.  
4  
5  
6 15. Jauniaux E, Bhide A. Prenatal ultrasound diagnosis and outcome of placenta  
7 previa accreta after cesarean delivery: a systematic review and meta-analysis.  
8 Am J Obstet Gynecol. 2017;217:27-36.  
9  
10  
11  
12 16. Jauniaux E, Chantraine F, Silver RM, Langhoff-Roos J; FIGO Placenta Accreta  
13 Diagnosis and Management Expert Consensus Panel. FIGO consensus  
14 guidelines on placenta accreta spectrum disorders: Epidemiology. Int J Gynaecol  
15 Obstet. 2018;140:265-73.  
16  
17  
18  
19  
20  
21 17. Collins SL, Stevenson GN, Al-Khan A, Illsley NP, Impey L, Pappas L, et al.  
22 Three-Dimensional Power Doppler Ultrasonography for Diagnosing Abnormally  
23 Invasive Placenta and Quantifying the Risk. Obstet Gynecol. 2015;126:645–53.  
24  
25  
26  
27  
28 18. Wells GA, Shea B, O'Connell D, et al. The Newcastle-Ottawa Scale (NOS) for  
29 assessing the quality of nonrandomised studies in meta-analyses.  
30 [www.ohri.ca/programs/clinical epidemiology/oxford.asp] updated 2014;  
31 accessed 10 June, 2018).  
32  
33  
34  
35  
36  
37 19. Chattopadhyay SK, Kharif H, Sherbeen MM. Placenta praevia and accreta after  
38 previous caesarean section. Eur J Obstet Gynecol Reprod Biol. 1993;52:151-6.  
39  
40  
41  
42 20. Zaki ZM, Bahar AM, Ali ME, Albar HA, Gerais MA. Risk factors and morbidity in  
43 patients with placenta previa accreta compared to placenta previa non-  
44 accreta. Acta Obstet Gynecol Scand. 1998;77:391-4.  
45  
46  
47  
48  
49 21. Ziadeh SM, Abu-Heija AT, El-Jallad MF. Placental praevia and accreta: an  
50 analysis of two-years' experience. J Obstet Gynaecol. 1999;19:584-6.  
51  
52  
53  
54  
55  
56  
57  
58  
59  
60

- 1  
2  
3 22. Ghourab S. Third-trimester transvaginal ultrasonography in placenta previa: does  
4 the shape of the lower placental edge predict clinical outcome? *Ultrasound*  
5 *Obstet Gynecol.* 2001;18:103-8.  
6  
7  
8  
9  
10 23. Bahar A, Abusham A, Eskandar M, Sobande A, Alsunaidi M. Risk factors and  
11 pregnancy outcome in different types of placenta previa. *J Obstet Gynaecol Can.*  
12 2009;31:126-31.  
13  
14  
15  
16  
17 24. Hamada S, Hasegawa J, Nakamura M, Matsuoka R, Ichizuka K, Sekizawa A, et  
18 al. Ultrasonographic findings of placenta lacunae and a lack of  
19 a clear zone in cases with placenta previa and normal placenta. *Prenat Diagn.*  
20 2011;31:1062-5.  
21  
22  
23  
24  
25  
26 25. Jang DG, We JS, Shin JU, Choi YJ, Ko HS, Park IY, et al. Maternal outcomes  
27 according to placental position in placental previa. *Int J Med Sci.* 2011;8:439-44.  
28  
29  
30  
31 26. Rosenberg T, Pariente G, Sergienko R, Wiznitzer A, Sheiner E. Critical analysis  
32 of risk factors and outcome of placenta previa. *Arch Gynecol Obstet.*  
33 2011;284:47-51.  
34  
35  
36  
37  
38 27. Kassem GA, Alzahrani AK. Maternal and neonatal outcomes of placenta previa  
39 and placenta accreta: three years of experience with a two-consultant approach.  
40 *Int J Womens Health.* 2013;28:803-10.  
41  
42  
43  
44  
45 28. Maher MA, Abdelaziz A, Bazeed MF. Diagnostic accuracy of ultrasound and MRI  
46 in the prenatal diagnosis of placenta accreta. *Acta Obstet Gynecol Scand.*  
47 2013;92:1017-22.  
48  
49  
50  
51 29. Alchalabi H, Lataifeh I, Obeidat B, Zayed F, Khader YS, Obeidat N. Morbidly  
52 adherent placenta previa in current practice: prediction and maternal morbidity in  
53  
54  
55  
56  
57  
58  
59  
60



- 1  
2  
3 a series of 23 women who underwent hysterectomy. *J Matern Fetal Neonatal*  
4  
5 *Med.* 2014;27:1734-7.  
6  
7  
8 30. Ascioglu O, Şahbaz A, Güngördük K, Yildirim G, Ascioglu BB, Ülker V. Maternal  
9  
10 and perinatal outcomes in women with placenta praevia and accreta in teaching  
11  
12 hospitals in Western Turkey. *J Obstet Gynaecol.* 2014;34:462-6.  
13  
14  
15 31. Sumigama S, Sugiyama C, Kotani T, Hayakawa H, Inoue A, Mano Y, et al.  
16  
17 Uterine sutures at prior caesarean section and placenta accreta in subsequent  
18  
19 pregnancy: a case-control study. *BJOG.* 2014;121:866-74;  
20  
21  
22 32. Ahmed SR, Aitallah A, Abdelghafar HM, Alsammani MA.  
23  
24 Major Placenta Previa: Rate, Maternal and Neonatal Outcomes Experience at  
25  
26 a Tertiary Maternity Hospital, Sohag, Egypt: A Prospective Study. *J Clin Diagn*  
27  
28 *Res.* 2015;9:17-9.  
29  
30  
31 33. Cheng KK, Lee MM. Rising incidence of morbidly adherent placenta and its  
32  
33 association with previous caesarean section: a 15-year analysis in a tertiary  
34  
35 hospital in Hong Kong. *Hong Kong Med J.* 2015;21:511-7.  
36  
37  
38 34. Cho HY, Hwang HS, Jung I, Park YW, Kwon JY, Kim YH. Diagnosis  
39  
40 of Placenta Accreta by Uterine Artery Doppler Velocimetry in Patients  
41  
42 With Placenta Previa. *J Ultrasound Med.* 2015;34:1571-5.  
43  
44  
45 35. Kollmann M, Gaulhofer J, Lang U, Klaritsch P. Placenta praevia: incidence, risk  
46  
47 factors and outcome. *J Matern Fetal Neonatal Med.* 2016;29:1395-8.  
48  
49  
50 36. Pilloni E, Alemanno MG, Gaglioti P, Sciarrone A, Garofalo A, Biolcati M, et al.  
51  
52 Accuracy of ultrasound in antenatal diagnosis of placental attachment disorders.  
53  
54 *Ultrasound Obstet Gynecol.* 2016;47:302-7.  
55  
56  
57  
58  
59  
60

- 1  
2  
3 37. Rezk MA, Shawky M. Grey-scale and colour Doppler ultrasound versus magnetic  
4 resonance imaging for the prenatal diagnosis of placenta accreta. *J Matern Fetal*  
5 *Neonatal Med.* 2016;29:218-23.  
6  
7  
8  
9  
10 38. Wortman AC, Schaefer SL, McIntire DD, Sheffield JS, Twickler DM.  
11 Complete Placenta Previa: Ultrasound Biometry and Surgical Outcomes. *AJP*  
12 *Rep.* 2018;8:e74-e78.  
13  
14  
15  
16  
17 39. Gottesfeld KR, Thompson HE, Holmes JH, Taylor ES. Ultrasonic  
18 placentography--a new method for placental localization. *Am J Obstet Gynecol.*  
19 1966;96:538-47.  
20  
21  
22  
23  
24 40. Kohorn EI, Walker RH, Morrison J, Campbell S. Placental localization. A  
25 comparison between ultrasonic compound B scanning and radioisotope  
26 scanning. *Am J Obstet Gynecol.* 1969;103:868-77.  
27  
28  
29  
30  
31 41. Ballas S, Gitstein S, Jaffa AJ, Peyser MR. Midtrimester placenta previa: normal or  
32 pathologic finding. *Obstet Gynecol.* 1979;54:12-4.  
33  
34  
35  
36 42. Leerentveld RA, Gilberts EC, Arnold MJ, Wladimiroff JW. Accuracy and safety of  
37 transvaginal sonographic placental localisation. *Obstet Gynecol* 1990;76:759-62.  
38  
39  
40 43. Smith RS, Lauria MR, Comstock CH, Treadwell MC, Kirk JS, Lee W, et al.  
41 Transvaginal ultrasonography for all placentas that appear to be low-lying or over  
42 the internal cervical os. *Ultrasound Obstet Gynecol* 1997;9:22-4.  
43  
44  
45  
46 44. Dashe JS, McIntire DD, Ramus RM, Santos-Ramos R, Twickler DM. Persistence  
47 of placenta previa according to gestational age at ultrasound detection. *Obstet*  
48 *Gynecol* 2002;99:692-7.  
49  
50  
51  
52  
53  
54  
55  
56  
57  
58  
59  
60

- 1  
2  
3 45. Quant HS, Friedman AM, Wang E, Parry S, Schwartz N. Transabdominal  
4  
5 ultrasonography as a screening test for second-trimester placenta previa. *Obstet*  
6  
7 *Gynecol.* 2014;123:628-33.  
8  
9
- 10 46. Reddy UM, Abuhamad AZ, Levine D, Saade GR; Fetal Imaging Workshop Invited  
11  
12 Participants. Fetal imaging: executive summary of a joint Eunice Kennedy Shriver  
13  
14 National Institute of Child Health and Human Development, Society for Maternal-  
15  
16 Fetal Medicine, American Institute of Ultrasound in Medicine, American College of  
17  
18 Obstetricians and Gynecologists, American College of Radiology, Society for  
19  
20 Pediatric Radiology, and Society of Radiologists in Ultrasound Fetal Imaging  
21  
22 Workshop. *J Ultrasound Med.* 2014;33:745-57.  
23  
24  
25
- 26 47. Jauniaux E, Collins SL, Jurkovic D, Burton GJ. Accreta placentation: a systematic  
27  
28 review of prenatal ultrasound imaging and grading of villous invasiveness. *Am J*  
29  
30 *Obstet Gynecol.* 2016;215:712-21.  
31  
32
- 33 48. Collins SL, Chantraine F, Morgan TK, Jauniaux E. Abnormally adherent and  
34  
35 invasive placenta: a spectrum disorder in need of a name. *Ultrasound Obstet*  
36  
37 *Gynecol.* 2018;51:165-6.  
38  
39
- 40 49. Collins SL, Ashcroft A, Braun T, Calda P, Langhoff-Ross J, Morel O et al.,  
41  
42 Proposed for standardized ultrasound descriptions of abnormally invasive placenta  
43  
44 (AIP). *Ultrasound Obstet Gynecol.* 2016;47:271-5.  
45  
46
- 47 50. Alfirevic Z, Tang A-W, Collins SL, Robson SC, Palacios-Jaraquemadas, on behalf  
48  
49 of the Ad-hoc International AIP Expert group. Pro forma for ultrasound reporting in  
50  
51 suspected abnormally invasive placenta (AIP); an international consensus.  
52  
53 *Ultrasound Obstet Gynecol.* 2016;47:276-8.  
54  
55  
56  
57  
58  
59  
60

- 1  
2  
3 51. Jauniaux E, Bhide A, Kennedy A, Woodward P, Hubinont C, Collins S; FIGO  
4 Placenta Accreta Diagnosis and Management Expert Consensus Panel. FIGO  
5 consensus guidelines on placenta accreta spectrum disorders: Prenatal diagnosis  
6 and screening. *Int J Gynaecol Obstet*. 2018;140:274-80.  
7  
8  
9  
10  
11  
12 52. Greenbaum S, Wainstock T, Dukler D, Leron E, Erez O. Underlying mechanisms  
13 of retained placenta: Evidence from a population based cohort study. *Eur J Obstet*  
14 *Gynecol Reprod Biol*. 2017;216:12-7.  
15  
16  
17  
18  
19 53. Obstetric Care Consensus No. 7 Summary: Placenta Accreta Spectrum. *Obstet*  
20 *Gynecol*. 2018;132:1519-21.  
21  
22  
23  
24 54. Bartels HC, Rogers AC, O'Brien D, McVey R, Walsh J, Brennan DJ. Association  
25 of Implementing a Multidisciplinary Team Approach in the Management of  
26 Morbidly Adherent Placenta With Maternal Morbidity and Mortality. *Obstet*  
27 *Gynecol*. 2018; doi: 10.1097/AOG.0000000000002865.  
28  
29  
30  
31  
32  
33 55. Wright JD, Silver RM, Bonanno C, Gaddipati S, Lu YS, Simpson LL, et al. Practice  
34 patterns and knowledge of obstetricians and gynecologists regarding placenta  
35 accreta. *J Matern Fetal Neonatal Med*. 2013;26:1602-9.  
36  
37  
38  
39  
40 56. Cal M, Ayres-de-Campos D, Jauniaux E. International survey of practices used in  
41 the diagnosis and management of placenta accreta spectrum disorders. *Int J*  
42 *Gynaecol Obstet*. 2018;140:307-11.  
43  
44  
45  
46  
47 57. Allen L, Jauniaux E, Hobson S, Papillon-Smith J, Belfort MA; FIGO Placenta  
48 Accreta Diagnosis and Management Expert Consensus Panel. FIGO consensus  
49 guidelines on placenta accreta spectrum disorders: Nonconservative surgical  
50 management. *Int J Gynaecol Obstet*. 2018;140:281-290.  
51  
52  
53  
54  
55  
56  
57  
58  
59  
60

- 1  
2  
3 58. Farquhar CM, Li Z, Lensen S, McLintock C, Pollock W, Peek MJ et al. Incidence,  
4 risk factors and perinatal outcomes for placenta accreta in Australia and New  
5 Zealand: a case-control study. *BMJ Open*. 2017;7:e017713.  
6  
7  
8  
9  
10 59. Sargent W, Collins SL. Are women antenatally diagnosed with abnormally  
11 invasive placenta receiving optimal management in England? An observational  
12 study of planned place of delivery. *Acta Obstet Gynecol Scand*. 2019;98:337-  
13 341.  
14  
15  
16  
17  
18  
19 60. Cresswell JA, Ronsmans C, Calvert C, Filippi V. Prevalence of placenta praevia  
20 by world region: a systematic review and meta-analysis. *Trop Med Int*  
21 *Health*. 2013;18:712-24.  
22  
23  
24  
25  
26  
27  
28  
29  
30  
31  
32  
33  
34  
35  
36  
37  
38  
39  
40  
41  
42  
43  
44  
45  
46  
47  
48  
49  
50  
51  
52  
53  
54  
55  
56  
57  
58  
59  
60

**Table 1:** Characteristics and quality assessment of the 20 studies included in the review.

|                                          | Country      | Dates     | Study type                                     | Risk of bias Categories |               |         | Overall |
|------------------------------------------|--------------|-----------|------------------------------------------------|-------------------------|---------------|---------|---------|
|                                          |              |           |                                                | Selection               | Comparability | Outcome |         |
| Chattopadhyay et al., 1993 <sup>19</sup> | Saudi Arabia | 1988-1992 | Retrospective/ Single Institution              | ⊗⊗                      | ⊗             | ⊗⊗      | Medium  |
| Zaki et al., 1998 <sup>20</sup>          | Saudi Arabia | 1990-1996 | Retrospective/ Single Institution              | ⊗⊗                      | ⊗             | ⊗       | High    |
| Ziadeh et al., 1999 <sup>21</sup>        | Jordan       | 1995-1996 | Prospective/ Single Institution                | ⊗⊗⊗                     | ⊗             | ⊗⊗      | Medium  |
| Gourab et al., 2001 <sup>22</sup>        | Saudi Arabia | 1995-2000 | Prospective/ Single Institution                | ⊗⊗⊗                     | ⊗             | ⊗⊗      | Medium  |
| Bahar et al., 2009 <sup>23</sup>         | Saudi Arabia | 1996-2005 | Retrospective/ Single Institution              | ⊗⊗                      | ⊗             | ⊗⊗      | Medium  |
| Hamada et al., 2011 <sup>24</sup>        | Japan        | 2007-2009 | Prospective/ Single Institution <sup>¶</sup>   | ⊗⊗⊗⊗                    | ⊗⊗            | ⊗⊗⊗     | Low     |
| Jang et al., 2011 <sup>25</sup>          | South Korea  | 1999-2009 | Retrospective/ 3 Institutions                  | ⊗⊗                      | ⊗             | ⊗⊗      | Medium  |
| Rosenberg et al., 2011 <sup>26</sup>     | Israel       | 1988-2009 | Retrospective/ Region <sup>¶</sup>             | ⊗⊗                      | ⊗             | ⊗⊗      | Medium  |
| Kassem et al., 2013 <sup>27</sup>        | Saudi Arabia | 2009-2012 | Retrospective/ Single Institution              | ⊗⊗⊗                     | ⊗             | ⊗⊗      | Medium  |
| Maher et al., 2013 <sup>28</sup>         | Egypt        | 2008-2011 | Prospective/ Single Institution                | ⊗⊗⊗⊗                    | ⊗⊗            | ⊗⊗⊗     | Low     |
| Alchalabi et al., 2014 <sup>29</sup>     | Jordan       | 2003-2012 | Retrospective/ Single Institution*             | ⊗⊗                      | ⊗             | ⊗⊗      | Medium  |
| Ascioglu et al., 2014 <sup>30</sup>      | Turkey       | 2005-2010 | Retrospective/ Single Institution <sup>¶</sup> | ⊗⊗⊗⊗                    | ⊗⊗            | ⊗⊗⊗     | Low     |
| Sumigama et al., 2014 <sup>31</sup>      | Japan        | 1994-2012 | Retrospective/ 11 Institutions <sup>¶</sup>    | ⊗⊗⊗⊗                    | ⊗⊗            | ⊗⊗⊗     | Low     |
| Ahmed et al., 2015 <sup>32</sup>         | Egypt        | 2014      | Prospective/ Single Institution <sup>¶</sup>   | ⊗⊗                      | ⊗             | ⊗       | High    |
| Cheng et al., 2015 <sup>33</sup>         | China        | 1999-2013 | Retrospective/ Single Institution*             | ⊗⊗⊗⊗                    | ⊗⊗            | ⊗⊗⊗     | Low     |
| Cho et al., 2015 <sup>34</sup>           | South-Korea  | 1991-2013 | Retrospective/ Single Institution              | ⊗⊗                      | ⊗             | ⊗⊗      | Medium  |
| Kollmann et al., 2016 <sup>35</sup>      | Austria      | 1993-2012 | Retrospective/ Region                          | ⊗⊗⊗⊗                    | ⊗⊗            | ⊗⊗⊗     | Low     |
| Pilloni et al., 2016 <sup>36</sup>       | Italy        | 2011-2014 | Prospective/ Region                            | ⊗⊗⊗⊗                    | ⊗⊗            | ⊗⊗⊗     | Low     |
| Rezk et al., 2016 <sup>37</sup>          | Egypt        | 2012-2014 | Prospective/ Single Institution <sup>¶</sup>   | ⊗⊗⊗⊗                    | ⊗⊗            | ⊗⊗⊗     | Low     |
| Wortman et al., 2018 <sup>38</sup>       | US           | 2002-2011 | Retrospective/ Single Institution <sup>¶</sup> | ⊗⊗                      | ⊗             | ⊗⊗      | Medium  |

¶= Studies including major placenta previa only; \* Studies with no description of the ultrasound diagnostic signs for PAS.

**Table 2:** Prevalence of placenta previa with placenta accreta spectrum (PAS) per pregnancies or births in the corresponding obstetric population and incidence of PAS per cohorts of placenta previa.

|                                          | <b>Obstetric population</b> | <b>Prevalence (%)</b> | <b>Incidence (%)</b> |
|------------------------------------------|-----------------------------|-----------------------|----------------------|
| Chattopadhyay et al., 1993 <sup>19</sup> | 41,206 births               | 26 (0.063)            | 26/222 (11.7)        |
| Zaki et al., 1998 <sup>20</sup>          | 23,070 births               | 12 (0.052)            | 12/110 (10.9)        |
| Ziadeh et al., 1999 <sup>21</sup>        | 18,651 births               | 13 (0.070)            | 13/65 (20.0)         |
| Gourab et al., 2001 <sup>22</sup>        | 18,670 births               | 11 (0.059)            | 11/138 (8.0)         |
| Bahar et al., 2009 <sup>23</sup>         | 42,487 births               | 53 (0.125)            | 53/306 (17.3)        |
| Hamada et al., 2011 <sup>24</sup>        | 2,413 births                | 5 (0.207)             | 5/70 (7.1)           |
| Jang et al., 2011 <sup>25</sup>          | 35,030 births               | 53 (0.151)            | 53/560 (9.5)         |
| Rosenberg et al., 2011 <sup>26</sup>     | 185,476 births              | 23 (0.012)            | 23/779 (3.0)         |
| Kassem et al., 2013 <sup>27</sup>        | 29,053 births               | 25 (0.085)            | 25/122 (20.5)        |
| Maher et al., 2013 <sup>28</sup>         | 24,661 births               | 42 (0.170)            | 42/577 (7.3)         |
| Alchalabi et al., 2014 <sup>29</sup>     | 16,845 births               | 23 (0.137)            | 23/81 (28.4)         |
| Ascioglu et al., 2014 <sup>30</sup>      | 112,819 births              | 46 (0.041)            | 46/364 (12.6)        |
| Sumigama et al., 2014 <sup>31</sup>      | 96,670 births               | 46 (0.048)            | 46/954 (4.8)         |
| Ahmed et al., 2015 <sup>32</sup>         | 3,841 births                | 14 (0.365)            | 14/52 26.9           |
| Cheng et al., 2015 <sup>33</sup>         | 81,497 births               | 39 (0.048)            | 39/921 (4.2)         |
| Cho et al., 2015 <sup>34</sup>           | 11,210 pregnancies          | 39 (0.348)            | 39/442 (8.8)         |
| Kollmann et al., 2016 <sup>35</sup>      | 218,876 births              | 13 (0.006)            | 13/328 (4.0)         |
| Pilloni et al., 2016 <sup>36</sup>       | 108,000 births              | 37 (0.034)            | 37/314 (11.8)        |
| Rezk et al., 2016 <sup>37</sup>          | 12,654 pregnancies          | 53 (0.419)            | 53/74 (71.6)         |
| Wortman et al., 2018 <sup>38</sup>       | 148,031 births              | 14 (0.010)            | 14/157 (8.9)         |

**Table 3:** Studies presenting detailed histopathologic data on the depth of villous invasiveness (PAS grades).

| Author/Year                        | No of cases analysed per No of cases included in the study | PAS grades         |                   |                   |
|------------------------------------|------------------------------------------------------------|--------------------|-------------------|-------------------|
|                                    |                                                            | PC (%)             | PI (%)            | PP (%)            |
| Hamada et al, 2011 <sup>24</sup>   | 5/5                                                        | 3 (60.0%)          | 2 (40.0%)         | --                |
| Kassem et al, 2013 <sup>27</sup>   | 19/25                                                      | 13 (68.4%)         | 5 (26.3%)         | 1 (5.3%)          |
| Maher et al, 2013 <sup>28</sup>    | 42/42                                                      | 28 (66.6%)         | 13 (31.0%)        | 1 (2.4%)          |
| Achalabi et al, 2014 <sup>29</sup> | 23/23                                                      | 15 (65.2%)         | 4 (17.4%)         | 4 (17.4%)         |
| Sumigama et al, 2014 <sup>31</sup> | 46/46                                                      | 14 (30.4%)         | 21 (45.7%)        | 11 (23.9%)        |
| Cheng et al, 2015 <sup>33</sup>    | 39/39                                                      | 36 (92.3%)         | --                | 3 (7.7%)          |
| Cho et al, 2015 <sup>34</sup>      | 39/39                                                      | 24 (37.4)          | 11 (31.3%)        | 4 (31.3%)         |
| Pilloni et al, 2016 <sup>36</sup>  | 17/37                                                      | 7 (41.2%)          | 4 (23.5%)         | 6 (35.3%)         |
| Rezk et al, 2016 <sup>37</sup>     | 53/53                                                      | 31 (58.5%)         | 14 (26.4%)        | 8 (15.1%)         |
| <b>Total</b>                       | <b>283/309</b>                                             | <b>171 (60.4%)</b> | <b>74 (26.2%)</b> | <b>38 (13.4%)</b> |

PAS= placenta accreta spectrum



## Figure legends

**Fig 1:** Flow diagram showing the selection of reports included in the review.

**Fig 2:** Forest plots showing the heterogeneity of prevalence data in prospective and retrospective cohort studies of women presenting with a placenta previa. Only first author's name is given for each reference. *ES, effect size. CI, confidence interval*

**Fig 3:** Forest plots showing heterogeneity in the prevalence data for prospective and retrospective cohort studies of women diagnosed with placenta previa accreta. Only first author's name is given for each reference. *ES, effect size. CI, confidence interval*

**Fig 4:** Forest plots showing the heterogeneity in cohort studies reporting incidence data for women diagnosed with placenta previa major and PAS and those with either placenta previa minor or major and PAS. *ES, effect size. CI, confidence interval*

1  
2  
3  
4  
5  
6  
7  
8  
9  
10  
11  
12  
13  
14  
15  
16  
17  
18  
19  
20  
21  
22  
23  
24  
25  
26  
27  
28  
29  
30  
31  
32  
33  
34  
35  
36  
37  
38  
39  
40  
41  
42  
43  
44  
45  
46  
47  
48  
49  
50  
51  
52  
53  
54  
55  
56  
57  
58  
59  
60

Identification  
Screening  
Eligibility  
Included

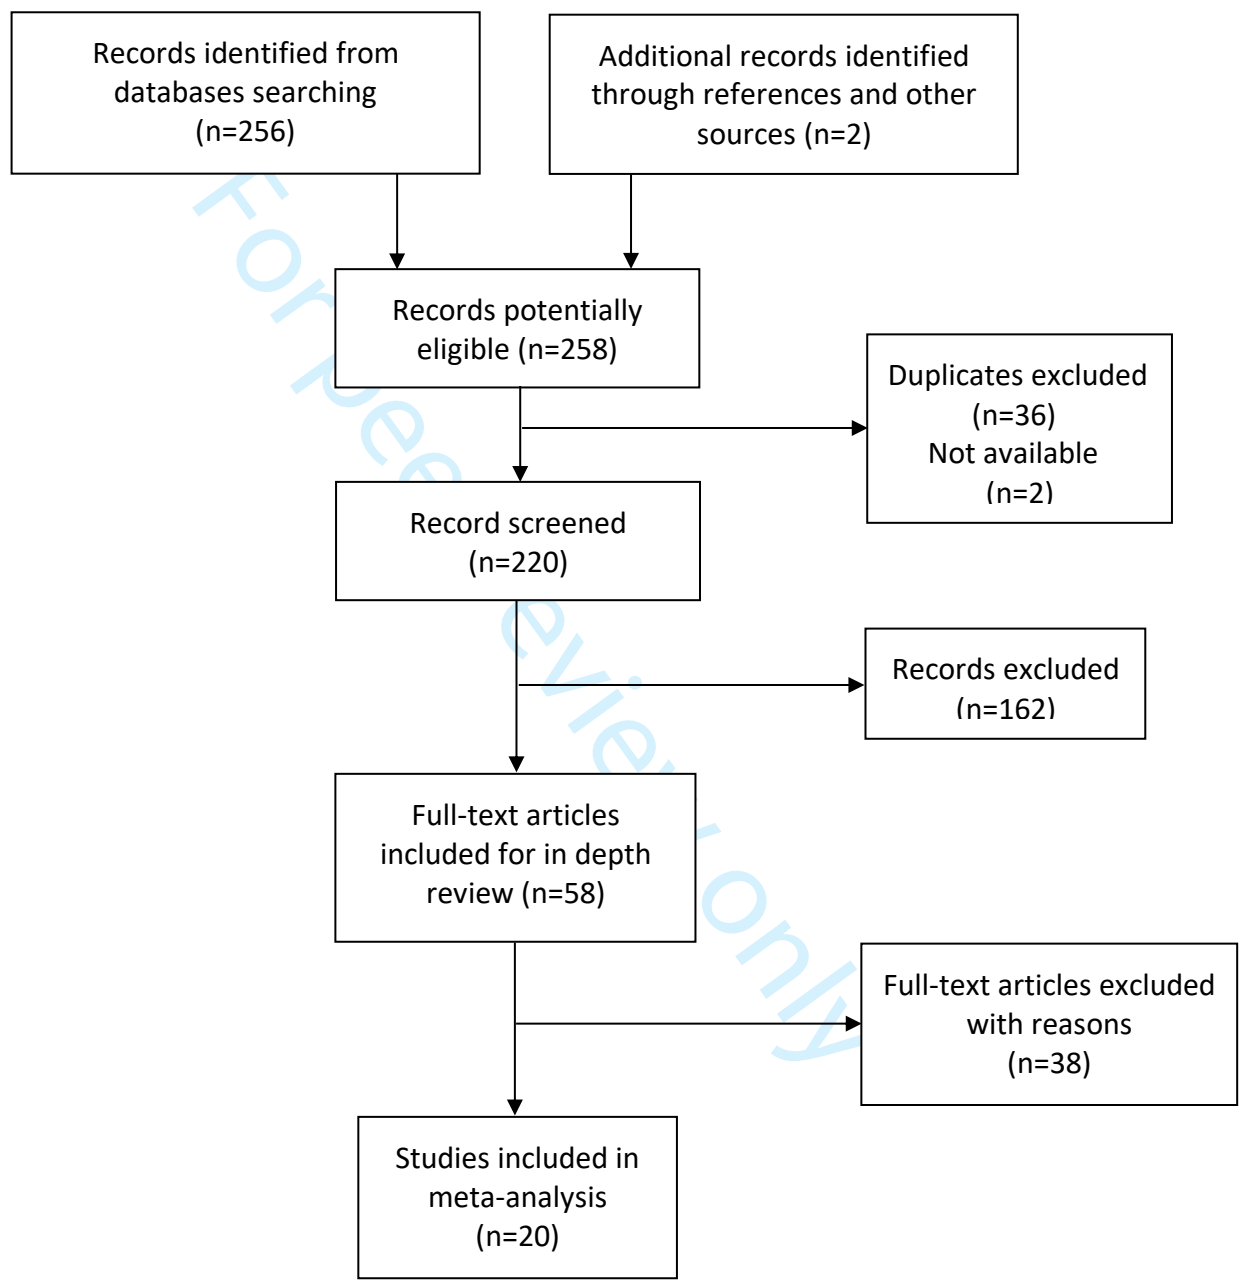

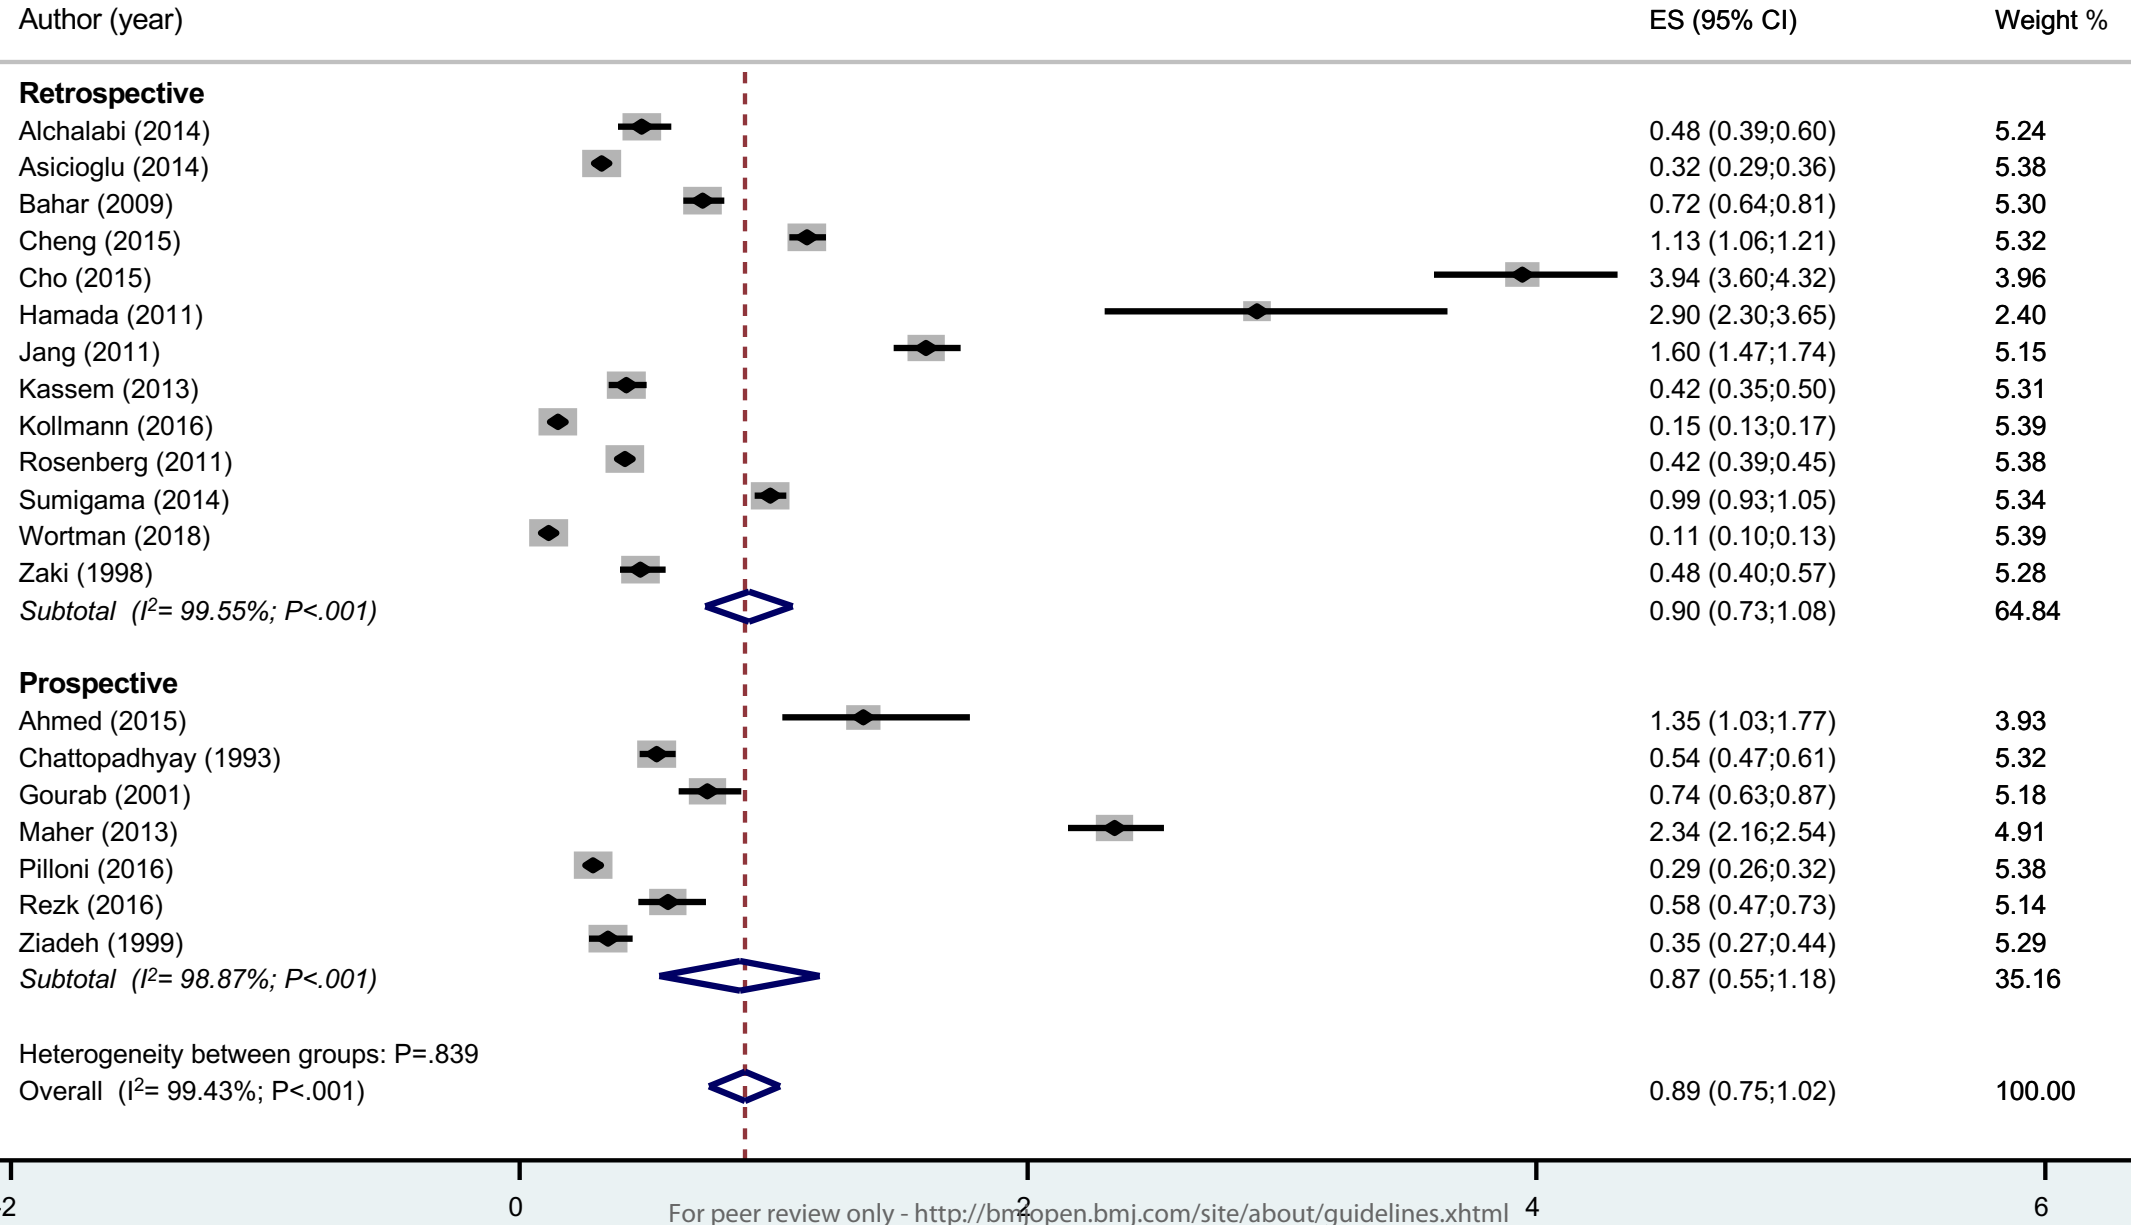

1  
2  
3  
4  
5  
6  
7  
8  
9  
10  
11  
12  
13  
14  
15  
16  
17  
18  
19  
20  
21  
22  
23  
24  
25  
26  
27  
28  
29  
30  
31  
32  
33  
34  
35  
36  
37  
38  
39  
40  
41

Author (year)

ES (95% CI)

Weight %

**Retrospective**

|                                                    |                  |       |
|----------------------------------------------------|------------------|-------|
| Alchalabi (2014)                                   | 0.14 (0.09;0.20) | 3.50  |
| Asicioglu (2014)                                   | 0.04 (0.03;0.05) | 7.25  |
| Bahar (2009)                                       | 0.12 (0.10;0.16) | 5.35  |
| Cheng (2015)                                       | 0.05 (0.04;0.07) | 7.03  |
| Cho (2015)                                         | 0.35 (0.25;0.48) | 1.39  |
| Hamada (2011)                                      | 0.21 (0.09;0.48) | 0.57  |
| Jang (2011)                                        | 0.15 (0.12;0.20) | 4.68  |
| Kassem (2013)                                      | 0.09 (0.06;0.13) | 5.33  |
| Kollmann (2016)                                    | 0.01 (0.00;0.01) | 7.60  |
| Rosenberg (2011)                                   | 0.01 (0.01;0.02) | 7.56  |
| Sumigama (2014)                                    | 0.05 (0.04;0.06) | 7.12  |
| Wortman (2018)                                     | 0.01 (0.01;0.02) | 7.55  |
| Zaki (1998)                                        | 0.05 (0.03;0.09) | 5.74  |
| <i>Subtotal (I<sup>2</sup>= 95.33%; P&lt;.001)</i> | 0.06 (0.04;0.07) | 70.66 |

**Prospective**

|                                                    |                  |       |
|----------------------------------------------------|------------------|-------|
| Ahmed (2015)                                       | 0.36 (0.22;0.61) | 0.52  |
| Chattopadhyay (1993)                               | 0.06 (0.04;0.09) | 6.24  |
| Gourab (2001)                                      | 0.06 (0.03;0.11) | 5.23  |
| Maher (2013)                                       | 0.17 (0.13;0.23) | 3.81  |
| Pilloni (2016)                                     | 0.03 (0.02;0.05) | 7.29  |
| Rezk (2016)                                        | 0.42 (0.32;0.55) | 1.31  |
| Ziadeh (1999)                                      | 0.07 (0.04;0.12) | 4.94  |
| <i>Subtotal (I<sup>2</sup>= 92.77%; P&lt;.001)</i> | 0.12 (0.07;0.17) | 29.34 |

Heterogeneity between groups: P=.014

Overall (I<sup>2</sup> = 95.21%; P<.001);

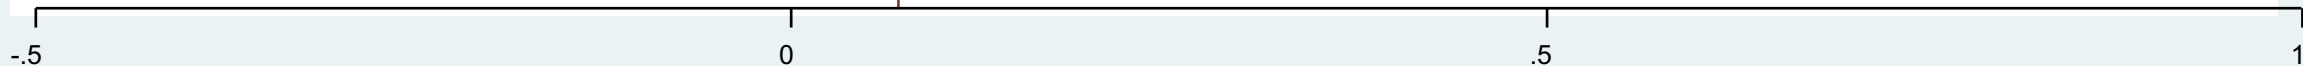

1  
2  
3  
4  
5  
6  
7  
8  
9  
10  
11  
12  
13  
14  
15  
16  
17  
18  
19  
20  
21  
22  
23  
24  
25  
26  
27  
28  
29  
30  
31  
32  
33  
34  
35  
36  
37  
38  
39  
40  
41

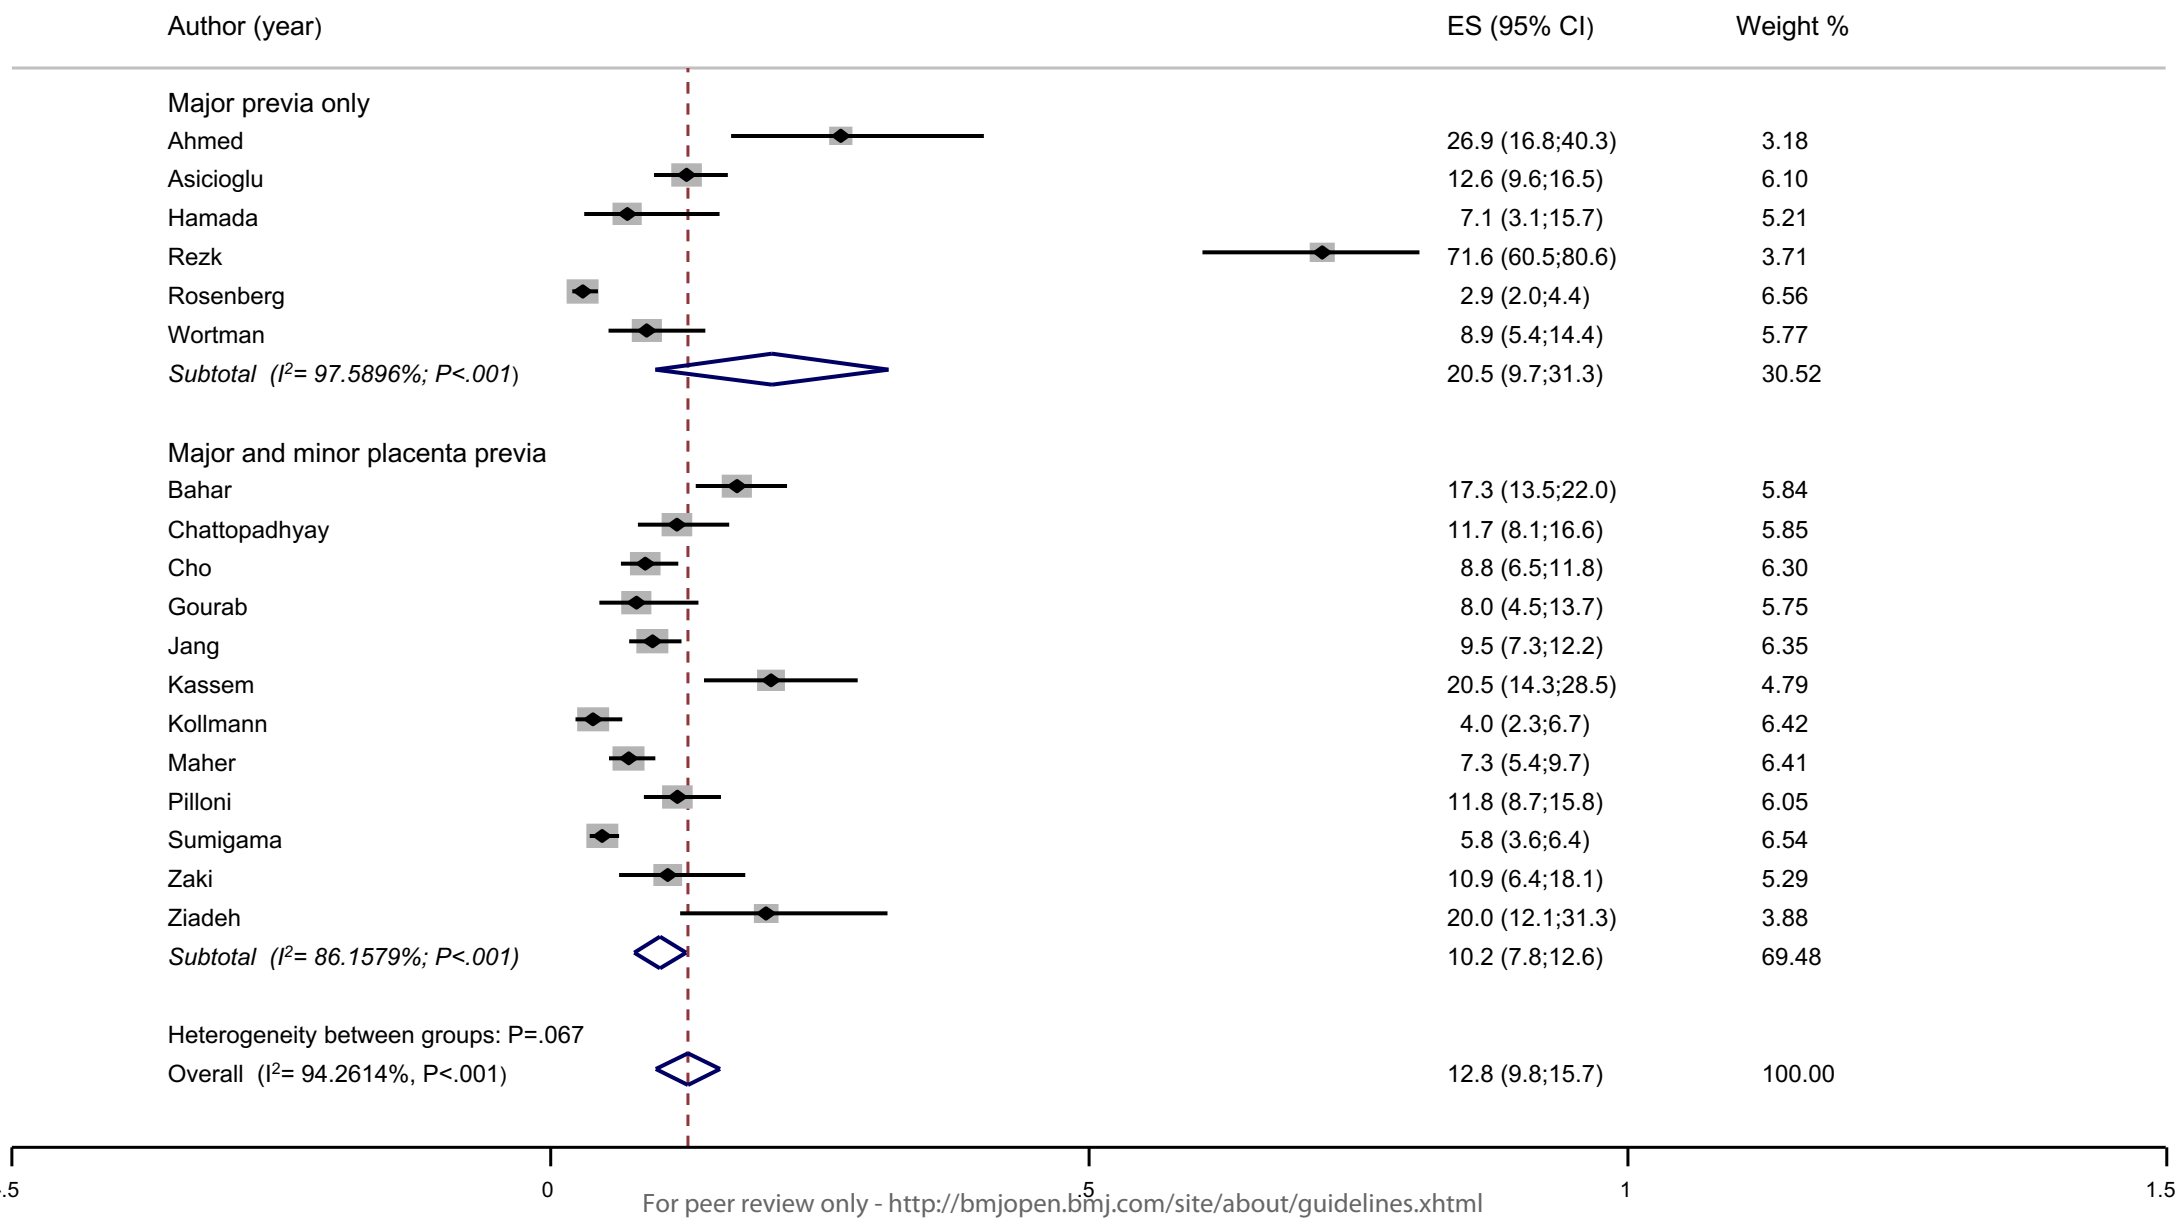

## Appendix Electronic search strategy

**Time period:** August 1982 and September 2018

### **Inclusion Criteria**

- Cohort studies involving women presenting with a singleton pregnancy and placenta previa complicated by accreta placentation diagnosed during the second half of pregnancy and/or at birth.
- Original publication with data on the number of pregnancies, births and/or deliveries in the corresponding population.

### **Exclusion Criteria**

- Reviews, opinions, letters, protocols and conference proceedings.
- Case series and cohorts of less than 50 cases of placenta previa.
- Articles published before 1982.
- Articles in languages other than English.
- Non-human studies.

## MOOSE (Meta-analyses Of Observational Studies in Epidemiology) Checklist

A reporting checklist for Authors, Editors, and Reviewers of Meta-analyses of Observational Studies. You must report the page number in your manuscript where you consider each of the items listed in this checklist. If you have not included this information, either revise your manuscript accordingly before submitting or note N/A.

| Reporting Criteria                                                                                              | Reported (Yes/No) | Reported on Page No. |
|-----------------------------------------------------------------------------------------------------------------|-------------------|----------------------|
| <b>Reporting of Background</b>                                                                                  |                   |                      |
| Problem definition                                                                                              |                   |                      |
| Hypothesis statement                                                                                            |                   |                      |
| Description of Study Outcome(s)                                                                                 |                   |                      |
| Type of exposure or intervention used                                                                           |                   |                      |
| Type of study design used                                                                                       |                   |                      |
| Study population                                                                                                |                   |                      |
| <b>Reporting of Search Strategy</b>                                                                             |                   |                      |
| Qualifications of searchers (eg, librarians and investigators)                                                  |                   |                      |
| Search strategy, including time period included in the synthesis and keywords                                   |                   |                      |
| Effort to include all available studies, including contact with authors                                         |                   |                      |
| Databases and registries searched                                                                               |                   |                      |
| Search software used, name and version, including special features used (eg, explosion)                         |                   |                      |
| Use of hand searching (eg, reference lists of obtained articles)                                                |                   |                      |
| List of citations located and those excluded, including justification                                           |                   |                      |
| Method for addressing articles published in languages other than English                                        |                   |                      |
| Method of handling abstracts and unpublished studies                                                            |                   |                      |
| Description of any contact with authors                                                                         |                   |                      |
| <b>Reporting of Methods</b>                                                                                     |                   |                      |
| Description of relevance or appropriateness of studies assembled for assessing the hypothesis to be tested      |                   |                      |
| Rationale for the selection and coding of data (eg, sound clinical principles or convenience)                   |                   |                      |
| Documentation of how data were classified and coded (eg, multiple raters, blinding, and interrater reliability) |                   |                      |
| Assessment of confounding (eg, comparability of cases and controls in studies where appropriate)                |                   |                      |

| Reporting Criteria                                                                                                                                                                                                                                                           | Reported (Yes/No) | Reported on Page No. |
|------------------------------------------------------------------------------------------------------------------------------------------------------------------------------------------------------------------------------------------------------------------------------|-------------------|----------------------|
| Assessment of study quality, including blinding of quality assessors; stratification or regression on possible predictors of study results                                                                                                                                   |                   |                      |
| Assessment of heterogeneity                                                                                                                                                                                                                                                  |                   |                      |
| Description of statistical methods (eg, complete description of fixed or random effects models, justification of whether the chosen models account for predictors of study results, dose-response models, or cumulative meta-analysis) in sufficient detail to be replicated |                   |                      |
| Provision of appropriate tables and graphics                                                                                                                                                                                                                                 |                   |                      |
| <b>Reporting of Results</b>                                                                                                                                                                                                                                                  |                   |                      |
| Table giving descriptive information for each study included                                                                                                                                                                                                                 |                   |                      |
| Results of sensitivity testing (eg, subgroup analysis)                                                                                                                                                                                                                       |                   |                      |
| Indication of statistical uncertainty of findings                                                                                                                                                                                                                            |                   |                      |
| <b>Reporting of Discussion</b>                                                                                                                                                                                                                                               |                   |                      |
| Quantitative assessment of bias (eg, publication bias)                                                                                                                                                                                                                       |                   |                      |
| Justification for exclusion (eg, exclusion of non-English-language citations)                                                                                                                                                                                                |                   |                      |
| Assessment of quality of included studies                                                                                                                                                                                                                                    |                   |                      |
| <b>Reporting of Conclusions</b>                                                                                                                                                                                                                                              |                   |                      |
| Consideration of alternative explanations for observed results                                                                                                                                                                                                               |                   |                      |
| Generalization of the conclusions (ie, appropriate for the data presented and within the domain of the literature review)                                                                                                                                                    |                   |                      |
| Guidelines for future research                                                                                                                                                                                                                                               |                   |                      |
| Disclosure of funding source                                                                                                                                                                                                                                                 |                   |                      |

Once you have completed this checklist, please save a copy and upload it as part of your submission. DO NOT include this checklist as part of the main manuscript document. It must be uploaded as a separate file.



# BMJ Open

## Epidemiology of Placenta Previa Accreta: A Systematic Review and Meta-analysis

|                                 |                                                                                                                                                                                                                                                                                                                                                                                             |
|---------------------------------|---------------------------------------------------------------------------------------------------------------------------------------------------------------------------------------------------------------------------------------------------------------------------------------------------------------------------------------------------------------------------------------------|
| Journal:                        | <i>BMJ Open</i>                                                                                                                                                                                                                                                                                                                                                                             |
| Manuscript ID                   | bmjopen-2019-031193.R3                                                                                                                                                                                                                                                                                                                                                                      |
| Article Type:                   | Original research                                                                                                                                                                                                                                                                                                                                                                           |
| Date Submitted by the Author:   | 04-Oct-2019                                                                                                                                                                                                                                                                                                                                                                                 |
| Complete List of Authors:       | Jauniaux, Eric; UCL, EGA Institute for Women Health<br>Grønbeck, Lene; University of Copenhagen, Department of Obstetrics, Rigshospitalet<br>Bunce, Catey; kings College london, Primary Care and Public Health Sciences<br>Langhoff-Roos, Jens; Rigshospitalet Infektionsmedicinsk Klinik,<br>Collins, Sally; University of Oxford, Nuffield Department of Women's and Reproductive Health |
| <b>Primary Subject Heading</b>: | Epidemiology                                                                                                                                                                                                                                                                                                                                                                                |
| Secondary Subject Heading:      | Global health, Obstetrics and gynaecology                                                                                                                                                                                                                                                                                                                                                   |
| Keywords:                       | Placenta previa accreta, Prevalence, Incidence, Low-lying placenta, Placenta previa                                                                                                                                                                                                                                                                                                         |
|                                 |                                                                                                                                                                                                                                                                                                                                                                                             |

SCHOLARONE™  
Manuscripts

# Epidemiology of Placenta Previa Accreta: A Systematic Review and Meta-analysis

Eric Jauniaux,<sup>1</sup> Lene Grønbeck,<sup>2</sup> Catey Bunce,<sup>3</sup> Jens Langhoff-Roos,<sup>2</sup> Sally L Collins<sup>4</sup>

## Author affiliations

1. EGA Institute for Women's Health, Faculty of Population Health Sciences, University College London (UCL), London, UK.
2. Department of Obstetrics, Rigshospitalet, University of Copenhagen, Denmark.
3. Statistic unit, School of Population Health and Environmental Sciences, Kings College London, London UK.
4. Nuffield Department of Women's and Reproductive Health, University of Oxford, UK

## Competing interest

*The authors report no conflict of interest.*

## Funding

*No funding was obtained for this study.*

**Key Words:** Placenta accreta spectrum; prevalence; incidence; low-lying placenta; placenta previa.

**Word counts:** Abstract=294; Main text= 3820.

**Corresponding author:** *Professor Eric Jauniaux, EGA Institute for Women's Health, University College London, 86-96 Chenies Mews, London WC1E 6HX, UK.*

Telephone numbers: +44/207/3908113

Fax: +44/207/3908115

E-mail: e.jauniaux@ucl.ac.uk

## ABSTRACT

**Objective** To estimate the prevalence and incidence of placenta previa complicated by placenta accreta spectrum (PAS) and to examine the different criteria being used for the diagnosis.

**Design** Systematic review and meta-analysis.

**Data Sources** PubMed, Google Scholar, clinicalTrials.gov and MEDLINE were searched between August 1982 and September 2018.

**Eligibility Criteria** Studies reporting on placenta previa complicated by PAS diagnosed in a defined obstetric population.

**Data extraction and synthesis** Two independent reviewers performed the data extraction using a predefined protocol and assessed the risk of bias using the Newcastle-Ottawa scale for observational studies, with difference agreed by consensus. The primary outcomes were overall prevalence of placenta previa, incidence of PAS according to the type of placenta previa and the reported clinical outcomes including number of peri-partum hysterectomies and direct maternal mortality. The secondary outcomes included the criteria used for the prenatal ultrasound diagnosis of placenta previa and the criteria used to diagnose and grade PAS at birth.

**Results** A total of 258 articles were reviewed and 13 retrospective and 7 prospective studies were included in the analysis which reported on 587 women with placenta previa and PAS. The meta-analysis indicated a significant ( $P < .001$ ) heterogeneity between study estimates for the prevalence of placenta previa, the prevalence of placenta previa with PAS and the incidence of PAS in the placenta previa cohort. The median prevalence of placenta previa was 0.56% (IQR 0.39;1.24) whereas the median

1  
2  
3 prevalence of placenta previa with PAS was 0.07% (IQR 0.05;0.16). The incidence of  
4  
5 PAS in women with a placenta previa was 11.10% (IQR 7.65;17.35).  
6

7 **Conclusions** The high heterogeneity in qualitative and diagnostic data between studies  
8  
9 emphasizes the need to implement standardized protocols for the diagnoses of both  
10  
11 placenta previa and PAS, including the type of placenta previa and grade of villous  
12  
13 invasiveness.  
14  
15

16  
17  
18  
19 PROSPERO Registration CRD42017068589  
20  
21  
22

### 23 **Strengths and limitations of this study**

- 24  
25  
26 • This study provides the first comprehensive evaluation of the epidemiology of  
27  
28 placenta previa complicated by PAS.  
29  
30
- 31  
32 • The search was performed using predetermined eligibility criteria in a defined  
33  
34 obstetric population.  
35
- 36  
37 • Thirteen out of 20 studies included in the study were retrospective limiting the  
38  
39 overall quality of the analysis.  
40
- 41  
42 • Only six studies provided data on the prenatal ultrasound diagnosis of PAS in  
43  
44 patients with placenta previa and nine studies on detailed histopathological  
45  
46 findings.  
47
- 48  
49 • High level of inconsistency between estimates in prevalence and incidence did  
50  
51 not allow for full meta-analysis of the clinical outcomes.  
52  
53  
54  
55  
56  
57  
58  
59  
60

## INTRODUCTION

Placenta accreta is a pathological condition of placentation associated with a high risk of massive obstetric hemorrhage during delivery. Initially described in 1937 by Irving and Hertig<sup>1</sup> as the abnormal adherence of the placenta to the myometrium due to the partial or complete absence of decidua basalis, it was subsequently redefined by Lukes et al<sup>2</sup> as a spectrum of abnormally adherent and invasive placentation disorders. Placenta accreta is now graded according to the depth of the villous penetration into the uterine wall starting with the abnormally adherent placenta or creta, where the villi attach directly to the surface of the myometrium without invading it, and extending to the invasive grades of placenta increta, where the villi penetrate deeply into the myometrium up to the uterine serosa, and placenta percreta, where the invasive villous tissue penetrates through the uterine serosa often entering the surrounding pelvic tissues.<sup>3-5</sup> The different grades of the placenta accreta spectrum (PAS) can co-exist in the same specimen and can be focal (just a small area of the placental bed) or extensive (including much of the placental bed).<sup>2</sup>

Over the last two decades, a growing body of epidemiology research has identified the effect of the rapid increase in caesarean delivery rates on the risks of PAS.<sup>6-10</sup> The main additional risk factor after a previous caesarean delivery is placenta previa. A large multicentric U.S. cohort study noted that for women presenting with placenta previa and prior caesarean delivery, the risk of PAS was 3%, 11%, 40%, 61%, and 67% for first, second, third, fourth, and fifth or more cesarean deliveries, respectively.<sup>7</sup> A national case-control study using the UK Obstetric Surveillance System found that the incidence of PAS increases from 1.7 per 10,000 births overall to 577 per

1  
2  
3 10,000 births in women with both a previous caesarean delivery and placenta previa.<sup>8</sup>  
4

5 Both abnormal adherence and invasion of villous tissue into the myometrium result  
6  
7 in failure of the placenta to separate spontaneously from the uterine wall at delivery.<sup>2-4</sup>  
8  
9 When unsuspected at the time of delivery, attempts to manually remove accreta villous  
10  
11 tissue typically provoke rapid bleeding from the utero-placental circulation.<sup>5,11</sup> In invasive  
12  
13 cases, this can lead to massive obstetric hemorrhage due to the disruption of the deep  
14  
15 uterine vasculature of the increta or percreta area.<sup>4,5</sup> Not surprisingly, prenatal diagnosis  
16  
17 of PAS has been shown to decrease maternal morbidity and mortality, and has thus  
18  
19 become essential in improving its management.<sup>12,13</sup> Tabsh et al were the first in 1982 to  
20  
21 report on the prenatal ultrasound diagnosis of a case of placenta increta.<sup>14</sup> A recent  
22  
23 systematic review and meta-analysis of prenatal ultrasound diagnosis of placenta previa  
24  
25 with PAS in women with a history of caesarean delivery has found that the overall  
26  
27 diagnostic accuracy of ultrasound in specialist units is in 90.9%.<sup>15</sup> However, in countries  
28  
29 with well-established screening programs for fetal anomalies, over half the cases of PAS  
30  
31 are not diagnosed before delivery.<sup>8,10</sup>  
32  
33  
34  
35  
36

37 Accreta placentation and in particular its invasive forms are impacting maternal  
38  
39 health outcomes globally and its prevalence is likely to increase. Women with a history  
40  
41 of previous caesarean delivery presenting with placenta previa complicated by PAS in  
42  
43 an ongoing pregnancy are now the cohort of obstetric patients with the highest risk of  
44  
45 delivery complications<sup>16</sup>, however, their epidemiology has not been comprehensively  
46  
47 reviewed yet. Health provision for the development of maternity centres with specialist  
48  
49 teams, equipment, drugs, blood bank and intensive care infrastructure to safely manage  
50  
51 women presenting with placenta previa and PAS requires an accurate evaluation of its  
52  
53  
54  
55  
56  
57  
58  
59  
60

1  
2  
3 epidemiology. The objective of this meta-analysis is to review the epidemiology of  
4  
5 women presenting with placenta previa and to examine the different criteria used by the  
6  
7 authors of cohort studies to diagnose placenta previa and PAS prenatally and to confirm  
8  
9 the diagnosis of PAS at birth.  
10  
11  
12  
13

## 14 **MATERIALS AND METHODS**

15  
16  
17 A systematic review was undertaken of articles providing data on prevalence and  
18  
19 incidence of PAS in women presenting with a placenta previa where the populations  
20  
21 sampled were defined. PubMed, Google Scholar, clinicalTrials.gov and MEDLINE were  
22  
23 searched for studies published between the first prenatal ultrasound description of  
24  
25 placenta accreta in August 1982 by Tabsh<sup>14</sup> et al and September 2018. The search  
26  
27 protocol was designed *a priori* and registered on PROSPERO (CRD42017068589). The  
28  
29 overall search strategy was inclusive of MeSH headings for the following terms  
30  
31 “placenta accreta, placenta increta, placenta percreta, abnormally invasive placenta,  
32  
33 morbidly adherent placenta and major placenta previa” (search strategy in online  
34  
35 supplementary data 1). Title, abstracts and full-text were independently assessed by the  
36  
37 authors for content, data extraction and analysis. Additional relevant studies were  
38  
39 identified from reference lists of reviews and editorials and by hand-searching key  
40  
41 journals and websites. All search results were combined in a reference database.  
42  
43 Duplicates were removed by hand. The search was limited to articles published in  
44  
45 English.  
46  
47  
48  
49  
50  
51

52 Two independent investigators (EJ and LG) selected studies in two stages. The  
53  
54 abstracts of all potentially relevant papers were individually examined for suitability.  
55  
56  
57  
58  
59  
60

1  
2  
3 Papers were only ruled out at this stage if they obviously did not meet the inclusion  
4 criteria. The remainder were obtained in full text and were independently assessed  
5 for content, data extraction and analysis. Disagreements between the two original  
6 reviewers were resolved by discussion with the third investigator (JLR). Articles were  
7 excluded if; they were published before August 1982, contained no data on the study  
8 population such as the overall pregnancies, births and/or deliveries numbers, were case  
9 reports or were overlapping.  
10  
11  
12  
13  
14  
15  
16  
17  
18

19 Study characteristics were extracted using a predesigned data extraction  
20 protocol including: author institution, year of publication, country of origin, study period,  
21 study type (retrospective, single institution, multiple institutions), total number of cases  
22 in the study population, type of placenta previa, diagnosis of PAS at birth (search  
23 strategy in online supplementary data 2). Outcome measures included the need to  
24 perform a peripartum hysterectomy and direct maternal mortality. Prior surgical history  
25 was also recorded. The reference standard for differential diagnosis between minor and  
26 major placenta previa was recorded based on the placental position inside the uterine  
27 cavity on transvaginal ultrasound with relation to the internal cervical os. For the  
28 diagnosis of accreta placentation, we referred to the clinical grading based on surgical  
29 findings at delivery as previously described<sup>17</sup> and to histopathologic findings when a  
30 caesarean hysterectomy was performed i.e. placental villi directly attached to the  
31 myometrium without interposing decidua or invading the uterine wall.  
32  
33  
34  
35  
36  
37  
38  
39  
40  
41  
42  
43  
44  
45  
46  
47  
48

49 Two independent reviewers (EJ and LG) undertook the quality assessment with  
50 difference agreed by consensus. The Newcastle-Ottawa scale for observational studies  
51 was used to establish the risk of bias in selection (representativeness of the exposed  
52  
53  
54  
55  
56  
57  
58  
59  
60



1  
2  
3 cohort, ascertainment of exposure and the demonstration that the outcome of interest  
4 was not present at the start of the study), comparability (evaluation of the cohorts  
5 based on the design or analysis), and outcome assessment.<sup>18</sup> These included  
6 retrospective versus prospective studies, single versus multiple institutions studies,  
7 prenatal ultrasound description of low-lying/placenta previa and PAS, histopathologic  
8 confirmation of the diagnosis of the PAS and corresponding grade of invasiveness and  
9 detailed data on management and maternal outcomes. Studies that scored four stars for  
10 selection, two stars for comparability, and three stars for ascertainment of the outcome  
11 were regarded to have a low risk of bias. Studies with two or three stars for selection,  
12 one for comparability, and two for outcome ascertainment were considered to have a  
13 medium risk of bias. We deemed any study with a score of one for selection or outcome  
14 ascertainment, or zero for any of the three domains, to have a high risk of bias. No  
15 study was excluded based on the risk of bias assessment.

16  
17  
18  
19  
20  
21  
22  
23  
24  
25  
26  
27  
28  
29  
30  
31  
32  
33 Analyses were conducted using STATA software (version 15; StataCorp, College  
34 Station, TX). Standard Kurtosis analysis indicated that some values were not normally  
35 distributed and study specific estimates are therefore presented as median and  
36 interquartile range (IQR). A random effects model was used to combine the studies  
37 while incorporating variations among studies unless there were three or less studies  
38 contributing to the meta-analysis in which case a fixed effect model was used. Statistical  
39 heterogeneity was assessed with the Cochran's Q-test and the  $I^2$  statistic (the  
40 proportion of variation in study estimates because of heterogeneity rather than sampling  
41 error). Forest plots are presented to graphically summarize the study results and the  
42 pooled results. A test for heterogeneity between sub-groups (i.e. study types) was  
43  
44  
45  
46  
47  
48  
49  
50  
51  
52  
53  
54  
55  
56  
57  
58  
59  
60

1  
2  
3 conducted.

## 4 5 **Patients and public involvement**

6  
7  
8 Patients and the public were not involved in the design or planning of the study.  
9

## 10 11 **RESULTS**

12  
13  
14 The initial search provided 256 records with cross-referencing providing an additional  
15  
16 two studies, making a total of 258 potentially relevant articles. After exclusion of  
17  
18 duplicates and the two which were not available (Figure 1), 220 remained. On screening  
19  
20 the titles and abstracts, a further 162 were excluded as the reported outcomes were not  
21  
22 relevant, leaving 58 studies which were obtained for full text review. An additional 38  
23  
24 articles were excluded after full review including letters (n=16), narrative reviews (n= 10)  
25  
26 commentaries (n= 9), conference proceedings (n= 2) and duplication of data in another  
27  
28 publication (n=1), leaving 20 articles for the final analysis.<sup>19-38</sup>

29  
30  
31  
32  
33 There were 13 retrospective<sup>19,20,23,25-27,29-31,33-35,38</sup> and 7  
34  
35 prospective<sup>21,22,24,28,32,36,37</sup> studies including a total of 1,207,296 births and 23,864 cases  
36  
37 referred as pregnancies. There were 15 studies from a single institution<sup>19-24,27-30,32-34,37,38</sup>  
38  
39 and five from multiple institutions<sup>25,31</sup> or a geographical region.<sup>26,35,36</sup> Overall, 18 studies  
40  
41 had low or medium risk of bias (Full data in online supplementary data 3).  
42  
43

44  
45 Table 1 presents the epidemiology data of the 20 studies. These studies included  
46  
47 587 women with placenta previa complicated by PAS out of 6,628 cases of placenta  
48  
49 previa. The median prevalence of placenta previa in the 20 studies was 0.56% (IQR  
50  
51 0.39;1.24) whereas the median prevalence of placenta previa with PAS was 0.07%  
52  
53 (IQR 0.05;0.16). The median incidence of PAS in women with a placenta previa was  
54  
55 11.10% (IQR 7.65;17.35).  
56  
57  
58  
59  
60

1  
2  
3 All authors except two<sup>29,33</sup> reported on the criteria used for the prenatal  
4 ultrasound diagnosis of placenta previa. Six studies<sup>24,26,30,32,37,38</sup> only included major  
5 placenta previa in their cohort as defined as the placenta completely covering or  
6 partially covering the internal os of the cervix. The others included both major and minor  
7 placenta previa. The definition of minor placenta previa varied with two studies<sup>31,36</sup> using  
8 the placental edge being <2cm from the internal os, two studies using < 3cm<sup>22,23</sup> and  
9 one study using <3 cm or <5 cm if associated with abnormal fetal presentation.<sup>21</sup> The  
10 gestational age at confirmation of the prenatal diagnosis of placenta previa was  
11 reported in six studies<sup>22,23,24,28,32,37</sup> and ranged between 20 weeks and 34 weeks and in  
12 one study the diagnosis of placenta previa was confirmed at birth when the placenta  
13 was found to be inserted in the lower segment.<sup>19</sup>

14  
15  
16  
17  
18  
19  
20  
21  
22  
23  
24  
25  
26  
27  
28 The ultrasound diagnostic signs for PAS were reported in six studies<sup>24,28,30,32,36,37</sup>  
29 with two studies also reporting on the use of magnetic resonance imaging.<sup>29,38</sup> The  
30 clinical criteria used for the diagnosis of PAS at birth were reported by nine  
31 studies<sup>19,20,23,27,28,30,33,36,37</sup> and included a difficult delivery of the placenta without easy  
32 separation uterine wall or requiring a “piecemeal removal” associated with heavy  
33 bleeding and excessive bleeding from the placental bed after placental delivery. One  
34 author described the presence of invasive villous tissue at delivery<sup>27</sup> and one the need  
35 to suture the placental bed.<sup>23</sup> None of the other authors reported on the gross  
36 appearance of the uterus or surgical findings at the time of caesarean delivery. In 12  
37 studies<sup>19,23,24,27-31,33,34,36,37</sup> the prenatal and/or clinical diagnosis was confirmed by  
38 histopathological examination with detailed description of the microscopic criterion only  
39 reported in six<sup>19,27,28,30,31,37</sup>. Detailed histopathological findings on the depth of villous  
40  
41  
42  
43  
44  
45  
46  
47  
48  
49  
50  
51  
52  
53  
54  
55  
56  
57  
58  
59  
60

1  
2  
3 invasiveness were reported in nine studies<sup>24,27-29,31,33,34,36,37</sup> out of the 20 studies (Table  
4  
5 2). These included 283 cases of placenta previa accreta graded for 171 (60.4%) as  
6  
7 placenta creta (adherent), 74 (26.2%) as placenta increta and 38 (13.4%) as placenta  
8  
9 percreta. These studies included a total of 383,003 pregnancies or births and the  
10  
11 prevalence for the different grades of placenta previa accreta was 0.05%, 0.02% and  
12  
13 0.01% for creta, increta and percreta, respectively.  
14  
15

16  
17 The meta-analysis indicated statistically significant ( $P<.001$ ) level of overall  
18  
19 heterogeneity between study estimates for the prevalence of placenta previa (Figure 2),  
20  
21 the prevalence of placenta previa with PAS (Figure 3) and the incidence of PAS in the  
22  
23 placenta previa cohort (Figure 4). There was strong evidence of inconsistency between  
24  
25 study types with  $I^2$  values greater 85%. The difference in heterogeneity between  
26  
27 prospective versus retrospective studies was not statistically significantly ( $P=.839$ )  
28  
29 different (Figure 2) whereas it was significant ( $P=.014$ ) for the prevalence of placenta  
30  
31 previa accreta (Figure 3). Adjusting for type of study (prospective versus retrospective)  
32  
33 did not reduce inconsistency between studies. The in-between placenta previa major  
34  
35 only versus minor and major placental previa was not significant ( $P=.067$ ) for the  
36  
37 incidence of PAS in patient with placenta previa (Figure 4).  
38  
39  
40  
41

42 All authors but two<sup>22,23</sup> reported on prior surgical history including  
43  
44 caesarean section<sup>19-21,24-38</sup>, uterine curettage<sup>28,30-32,34,37,38</sup> and myomectomy.<sup>28,36,37</sup> Data  
45  
46 on surgical management was available in 14 out of the 20 studies<sup>19,20,23,27-31,33-38</sup> with  
47  
48 314 out of 441 women presenting with a placenta previa complicated by PAS. The  
49  
50 median peri-partum hysterectomy rate of 69.2% (IQR 50.0;84.0). Data on maternal  
51  
52  
53  
54  
55  
56  
57  
58  
59  
60

1  
2  
3 mortality were available in 13 studies<sup>19-21,23,25,27-30,32,35,37,38</sup> and PAS accounted for 5  
4  
5 maternal deaths<sup>19,20,25,29,30</sup> out of 387 (1.3%) cases of placenta previa with PAS.  
6  
7  
8  
9

## 10 **DISCUSSION**

11  
12 This study provides a comprehensive evaluation of the prevalence of placenta previa  
13 complicated by PAS and the incidence of PAS in women presenting with a placenta  
14 previa. Women with a prior history of caesarean delivery presenting with a low-  
15 lying/placenta previa represent more than 90% of the cases of PAS.<sup>8,10,16</sup> The meta-  
16  
17 analysis indicates high heterogeneity for both the prenatal diagnosis of placenta previa  
18 and for the confirmation of the diagnosis of PAS at delivery. These findings highlight the  
19 need to use international standardized clinical protocols for the screening and  
20 management of this complex obstetric condition. The current situation limits the capacity  
21 building of healthcare providers on improvements in training, implementation of  
22 guidelines and changes in clinical practice behaviour.  
23  
24  
25  
26  
27  
28  
29  
30  
31  
32  
33  
34  
35

36 Defining the position of the placenta inside the uterus was one of the first aims of  
37 obstetric ultrasound examination.<sup>39,40</sup> Following the development of real-time ultrasound  
38 imaging, placental location became an integral part of the mid-pregnancy ultrasound  
39 examination.<sup>41</sup> Placenta previa was initially described with transabdominal scan as a  
40 placenta developing within the lower uterine segment and classified according to the  
41 relationship and/or the distance between the lower placental edge and the internal os of  
42 the uterine cervix i.e. minor placenta previa when lower edge is inside the lower uterine  
43 segment down to the internal os and major placenta previa when the placenta covers the  
44 cervix. Minor placenta previa can be further subdivided into low-lying placenta when the  
45  
46  
47  
48  
49  
50  
51  
52  
53  
54  
55  
56  
57  
58  
59  
60

1  
2  
3 lower edge does not reach the internal os and marginal placenta previa when it does.  
4  
5 Major placenta previa can also be described as partial or complete depending on the  
6  
7 amount of placental tissue covering the cervix. The use of transvaginal scanning has  
8  
9 allowed for a more precise evaluation of the distance between the placental edge and the  
10  
11 internal os<sup>42,43</sup> but as demonstrated in our meta-analysis, the reporting of the ultrasound  
12  
13 criteria used for the diagnosis of placenta previa has been heterogenous. In addition, we  
14  
15 found also wide variation in the gestational age at diagnosis. The timing of the  
16  
17 confirmation of the diagnosis has a direct impact on epidemiology data as up to 70% of  
18  
19 minor placenta previa at 20-23 weeks of gestation will resolve by 32-35 weeks.<sup>44,45</sup> An  
20  
21 expert panel of the American Institute of Ultrasound in Medicine<sup>46</sup> has recently  
22  
23 recommended ceasing the use of the terms 'partial' and 'marginal' and using the term  
24  
25 'placenta previa' only when the placenta lies directly over the internal os. The placenta  
26  
27 should be reported as 'low lying' when the placental edge is less than 2 cm from the  
28  
29 internal os and as normal when the placental edge is more than 2 cm from the internal  
30  
31 os. The findings of our meta-analysis highlight the need for the use of such a classification  
32  
33 in further studies.  
34  
35  
36  
37  
38  
39

40 Only six of the 20 studies included in the present meta-analysis provided data on  
41  
42 the prenatal ultrasound diagnosis of PAS in patients with placenta previa. We included  
43  
44 in the systematic review all studies published since the first ultrasound description of  
45  
46 PAS by Tabsh et al in 1982.<sup>14</sup> We found no studies between 1982 and 1993 (Table 1)  
47  
48 which corresponds to the time when high-resolution grey-scale ultrasound imaging  
49  
50 became widely available. Colour-Doppler imaging was introduced for the diagnosis of  
51  
52 PAS in 1992<sup>47</sup>, however the sensitivity and specificity of grey-scale imaging alone in  
53  
54  
55  
56  
57  
58  
59  
60

1  
2  
3 diagnosing for placenta previa accreta are high when performed by experience  
4 operators.<sup>15</sup> These findings indicate that the prenatal diagnosis of PAS can be  
5 performed using standard ultrasound equipment. Unlike placenta previa which is  
6 routinely screened for at the time of the fetal anomaly scan, PAS is currently not  
7 screened for and the data available on the prenatal diagnosis of the condition come  
8 exclusively from specialist centres.<sup>16</sup> In these centres, the diagnostic accuracy of  
9 ultrasound imaging is over 90%, but similar to placenta previa, the description of the  
10 ultrasound signs used for the diagnosis of PAS has also been highly variable over the  
11 last two decades.<sup>47,48</sup> The European Working Group on Abnormally Invasive Placenta  
12 and the Abnormally Invasive Placenta international expert group have recently  
13 proposed standardised descriptions of the ultrasound signs used for the prenatal  
14 diagnosis and a protocol for the ultrasound assessment of PAS.<sup>49,50</sup> The use of these  
15 protocols in prospective studies should also facilitate the screening of patients at high  
16 risk of PAS and in particular those with multiple prior caesarean deliveries presenting  
17 with a low-lying or placenta previa.<sup>51</sup>

18  
19 We found significant heterogeneity in the qualitative definition and diagnosis of  
20 PAS at birth among the nine studies that provided a description of the clinical  
21 findings.<sup>19,20,23,27,28,30,33,36,37</sup> Only one of these studies described the invasive  
22 appearance of placental tissue at delivery<sup>27</sup> whereas the others reported a difficult  
23 delivery of the placenta without easy separation from the uterine wall or requiring a  
24 “piecemeal removal” associated with heavy bleeding as diagnostic of PAS. These  
25 clinical criteria were first described by Irving and Hertig<sup>1</sup> in 1937 who did not have  
26 invasive cases in their cohort limiting their definition to abnormally adherent placenta

1  
2  
3 and not to placenta increta or percreta. This definition also fails to clearly differentiate  
4  
5 between abnormal adherence and placental retention as both present with similar  
6  
7 clinical symptoms and etiology<sup>52</sup> leading to possible over diagnosis of placenta previa  
8  
9 accreta. Similarly, the finding of excessive bleeding from the placental bed after delivery  
10  
11 of the placenta is a common complication of non-accreta placenta previa due to the  
12  
13 implantation of the placenta in the lower uterine segment which contains less muscular  
14  
15 fibers than the upper segment and is often thinner and dehiscent after multiple  
16  
17 caesarean deliveries.  
18  
19  
20

21  
22 Detailed histopathologic reports can only be obtained in those patients who have  
23  
24 a hysterectomy or a partial myometrial resection and thus in many studies there is not  
25  
26 histopathologic confirmation of the clinical diagnosis. The main histological diagnostic  
27  
28 criteria of accreta placentation i.e. absence of decidua between the tip of anchoring villi  
29  
30 and the superficial myometrium, is found with increasing incidence with advancing  
31  
32 gestation in pregnancies with no clinical evidence of PAS.<sup>5</sup> Thus the combination of  
33  
34 clinical criteria that do not differentiate between placenta retention and adherent accreta  
35  
36 and the use of non-diagnostic criteria of villous invasiveness may result in the over-  
37  
38 diagnosis of the adherent grade of PAS (Table 2), in particular in those studies reporting  
39  
40 a low rate of caesarean hysterectomy.<sup>28,36</sup> Overall, this can explain the wide range in  
41  
42 the prevalence (0.04 to 0.42%) of placenta previa with PAS and incidence (2.9 to  
43  
44 71.6%) of PAS in women presenting with placenta previa (Figures 3 and 4).  
45  
46  
47  
48

49  
50 Overall, management strategies and outcomes will vary depending on the  
51  
52 accuracy of prenatal diagnosis, local surgical expertise and more recently access to a  
53  
54 centre of excellence with multidisciplinary team approach.<sup>53,54</sup> In cases of high suspicion  
55  
56  
57  
58  
59  
60



1  
2  
3 of PAS during cesarean delivery, 60-70% of obstetricians-gynecologists proceed with a  
4  
5 peripartum hysterectomy.<sup>55,56</sup> By contrast with a conservative management approach,  
6  
7 radical surgery is often considered to be safer, in particular in cases of invasive  
8  
9 placentation.<sup>57</sup> The association between a placenta previa and a PAS increases the  
10  
11 risks of both maternal morbidity and mortality. In the present study we found that a  
12  
13 caesarean hysterectomy was the primary management option in around 70% of the  
14  
15 patients presenting with a placenta previa and PAS. The inter-study range was wide  
16  
17 with four studies<sup>19,21,29,37</sup> reporting peripartum hysterectomy rates < 50%, five<sup>28,31,32,34,36</sup>  
18  
19 had rates between 50-99% and four<sup>22,30,35,38</sup> had rates of 100%. This may be due to  
20  
21 difference in study protocols, local expertise and the impact of prenatal diagnosis on  
22  
23 management strategies but also as suggested by our analysis to difference in the rates  
24  
25 of the different grades of PAS and the accuracy of clinical diagnosis at birth and detailed  
26  
27 histopathologic examination confirming the diagnosis.  
28  
29  
30  
31  
32

33 The main limitations of this review are the quality of the published data. Thirteen  
34  
35 out of 20 studies included in the analysis studies were retrospective and there was wide  
36  
37 variation in the use of different ultrasound criteria for the prenatal diagnosis of placenta  
38  
39 previa, in the clinical diagnosis of PAS at delivery and in the authors providing detailed  
40  
41 histopathology data to confirm the clinical diagnosis. This is hampering the meta-  
42  
43 analysis of the clinical outcomes in particular the incidence of major hemorrhage at  
44  
45 delivery and the need and amount of blood transfusion but also the choice in  
46  
47 management protocols and in particular the use of conservative management  
48  
49 procedures. We would not, therefore, recommend the use of the pooled estimates  
50  
51 beyond that of a support towards the development of standardized diagnostic protocols.  
52  
53  
54  
55  
56  
57  
58  
59  
60

1  
2  
3 The prevalence of PAS in the general population of women giving birth varies  
4 widely.<sup>8,10,58,59</sup> A systematic review and meta-analysis of the prevalence of placenta  
5  
6  
7  
8  
9  
10  
11  
12  
13  
14  
15  
16  
17  
18  
19  
20  
21  
22  
23  
24  
25  
26  
27  
28  
29  
30  
31  
32  
33  
34  
35  
36  
37  
38  
39  
40  
41  
42  
43  
44  
45  
46  
47  
48  
49  
50  
51  
52  
53  
54  
55  
56  
57  
58  
59  
60

The prevalence of PAS in the general population of women giving birth varies widely.<sup>8,10,58,59</sup> A systematic review and meta-analysis of the prevalence of placenta praevia has found evidence suggestive of regional variation.<sup>60</sup> As both conditions are often associated with prior caesarean sections it is likely that national and local caesarean delivery rates, expertise in diagnosing both conditions antenatally and access to perinatal pathologist to confirm the diagnosis of PAS at birth will influence these epidemiology data. There is a need for further prospective multi-centre studies with participatory methodologies involving local service providers and facility management to accurately evaluate the consequences of high caesarean sections rates on maternal health within a particular population. Within this context, accurate epidemiologic data on PAS disorders are essential in planning screening programs and in making provision for the development of centres of excellence for the management of this increasingly common complex obstetric condition. Whilst the concept of core outcome measures within clinical trials is now well recognised and championed, greater efforts are required to disseminate this approach in epidemiological research to facilitate global estimation and recognition of problems emerging on a worldwide scale. Our study supports implementation, in both clinical practice and in reporting data on placenta previa accreta in the medical literature, of standardized protocols for prenatal diagnosis of both placenta previa and PAS, for the clinical diagnosis of PAS at birth and for the histopathologic confirmation examination.

## Author contributions

EJ, CB and JLR contributed equally to the study design. EJ, LG and JLR collected the data and carried out the qualitative analysis. CB and EJ carried out the quantitative

1  
2  
3 analysis. EJ, JLR and SC drafted the manuscript. All authors were involved in the critical  
4 discussion and approved this final version for publication. EJ is the guarantor of the study.  
5  
6  
7  
8  
9

## 10 **Data sharing statement**

11  
12 Extra data can be accessed via the Dryad data repository at <http://datadryad.org/> with the  
13 doi: 10.5061/dryad.5ds4833  
14  
15  
16  
17  
18

## 19 **REFERENCES**

- 20  
21  
22  
23 1. Irving C, Hertig AT. A study of placenta accreta. *Surgery, Gynecol Obstet*  
24 1937;64:178-200.  
25
- 26  
27 2. Luke RK, Sharpe JW, Greene RR. Placenta accreta: The adherent or invasive  
28 placenta. *Am J Obstet Gynecol* 1966;95:660–8.  
29
- 30  
31 3. Jauniaux E, Jurkovic D. Placenta accreta: pathogenesis of a 20th century  
32 iatrogenic uterine disease. *Placenta*. 2012;33:244-51.  
33  
34
- 35  
36 4. Jauniaux E, Bhide A, Burton GJ. Pathophysiology of accreta. In: Silver, R. ed.  
37 *Placenta accreta syndrome*. Portland: CRC Press; 2017:13–28.  
38  
39
- 40  
41 5. Jauniaux E, Collins SL, Burton GJ. Placenta accreta spectrum: Pathophysiology  
42 and evidence-based anatomy for prenatal ultrasound imaging. *Am J Obstet*  
43 *Gynecol*. 2018;218:75-87.  
44  
45
- 46  
47 6. Wu S, Kocherginsky M, Hibbard JU. Abnormal placentation: twenty-year  
48 analysis. *Am J Obstet Gynecol*. 2005;192:1458–61.  
49  
50
- 51  
52 7. Silver RM, Landon MB, Rouse DJ, Leveno KJ, Spong CY, Thom EA, et al.;  
53  
54  
55  
56  
57  
58  
59  
60 National Institute of Child Health and Human Development Maternal-Fetal

- 1  
2  
3 Medicine Units Network. Maternal morbidity associated with multiple repeat  
4 cesarean deliveries. *Obstet Gynecol* 2006;107:1226–32.  
5  
6  
7  
8 8. Fitzpatrick KE, Sellers S, Spark P, Kurinczuk JJ, Brocklehurst P, Knight M.  
9  
10 Incidence and risk factors for placenta accreta/increta/percreta in the UK: a  
11 national case-control study. *PLoS One*. 2012;7:e52893.  
12  
13  
14  
15 9. Bowman ZS, Eller AG, Bardsley TR, Greene T, Varner MW, Silver RM. Risk  
16 Factors for Placenta Accreta: A Large Prospective Cohort. *Am J Perinatol*.  
17 2014;31:799-804.  
18  
19  
20  
21 10. Thurn L, Lindqvist PG, Jakobsson M, Colmorn LB, Klungsoyr K, Bjarnadóttir RI,  
22 et al. Abnormally invasive placenta-prevalence, risk factors and antenatal  
23 suspicion: results from a large population-based pregnancy cohort study in the  
24 Nordic countries. *BJOG*. 2016;123:1348-55.  
25  
26  
27  
28  
29  
30  
31 11. Silver RM, Branch DW. Placenta Accreta Spectrum. *N Engl J Med*.  
32 2018;378:1529-36.  
33  
34  
35  
36 12. Chantraine F, Braun T, Gonser M, Henrich W, Tutschek B. Prenatal diagnosis of  
37 abnormally invasive placenta reduces maternal peripartum hemorrhage and  
38 morbidity. *Acta Obstet Gynecol Scand*. 2013;92:439-44.  
39  
40  
41  
42 13. Hall T, Wax JR, Lucas FL, Cartin A, Jones M, Pinette MG. Prenatal sonographic  
43 diagnosis of placenta accreta: Impact on maternal and neonatal outcomes. *J Clin*  
44 *Ultrasound*. 2014;42:449-55.  
45  
46  
47  
48  
49 14. Tabsh KM, Brinkman CR 3rd, King W. Ultrasound diagnosis of placenta increta. *J*  
50 *Clin Ultrasound*. 1982;10:288-90.  
51  
52  
53  
54  
55  
56  
57  
58  
59  
60

- 1  
2  
3 15. Jauniaux E, Bhide A. Prenatal ultrasound diagnosis and outcome of placenta  
4  
5 previa accreta after cesarean delivery: a systematic review and meta-analysis.  
6  
7 Am J Obstet Gynecol. 2017;217:27-36.  
8  
9
- 10 16. Jauniaux E, Chantraine F, Silver RM, Langhoff-Roos J; FIGO Placenta Accreta  
11  
12 Diagnosis and Management Expert Consensus Panel. FIGO consensus  
13  
14 guidelines on placenta accreta spectrum disorders: Epidemiology. Int J Gynaecol  
15  
16 Obstet. 2018;140:265-73.  
17  
18
- 19 17. Collins SL, Stevenson GN, Al-Khan A, Illsley NP, Impey L, Pappas L, et al.  
20  
21 Three-Dimensional Power Doppler Ultrasonography for Diagnosing Abnormally  
22  
23 Invasive Placenta and Quantifying the Risk. Obstet Gynecol. 2015;126:645–53.  
24  
25
- 26 18. Wells GA, Shea B, O'Connell D, et al. The Newcastle-Ottawa Scale (NOS) for  
27  
28 assessing the quality of nonrandomised studies in meta-analyses.  
29  
30 [www.ohri.ca/programs/clinical epidemiology/oxford.asp] updated 2014;  
31  
32 accessed 10 June, 2018).  
33  
34
- 35 19. Chattopadhyay SK, Kharif H, Sherbeeni MM. Placenta praevia and accreta after  
36  
37 previous caesarean section. Eur J Obstet Gynecol Reprod Biol. 1993;52:151-6.  
38  
39
- 40 20. Zaki ZM, Bahar AM, Ali ME, Albar HA, Geraiis MA. Risk factors and morbidity in  
41  
42 patients with placenta previa accreta compared to placenta previa non-  
43  
44 accreta. Acta Obstet Gynecol Scand. 1998;77:391-4.  
45  
46
- 47 21. Ziadeh SM, Abu-Heija AT, El-Jallad MF. Placental praevia and accreta: an  
48  
49 analysis of two-years' experience. J Obstet Gynaecol. 1999;19:584-6.  
50  
51  
52  
53  
54  
55  
56  
57  
58  
59  
60

- 1  
2  
3 22. Ghourab S. Third-trimester transvaginal ultrasonography in placenta previa: does  
4 the shape of the lower placental edge predict clinical outcome? *Ultrasound*  
5 *Obstet Gynecol.* 2001;18:103-8.  
6  
7  
8  
9  
10 23. Bahar A, Abusham A, Eskandar M, Sobande A, Alsunaidi M. Risk factors and  
11 pregnancy outcome in different types of placenta previa. *J Obstet Gynaecol Can.*  
12 2009;31:126-31.  
13  
14  
15  
16  
17 24. Hamada S, Hasegawa J, Nakamura M, Matsuoka R, Ichizuka K, Sekizawa A, et  
18 al. Ultrasonographic findings of placenta lacunae and a lack of  
19 a clear zone in cases with placenta previa and normal placenta. *Prenat Diagn.*  
20 2011;31:1062-5.  
21  
22  
23  
24  
25  
26 25. Jang DG, We JS, Shin JU, Choi YJ, Ko HS, Park IY, et al. Maternal outcomes  
27 according to placental position in placenta previa. *Int J Med Sci.* 2011;8:439-44.  
28  
29  
30  
31 26. Rosenberg T, Pariente G, Sergienko R, Wiznitzer A, Sheiner E. Critical analysis  
32 of risk factors and outcome of placenta previa. *Arch Gynecol Obstet.*  
33 2011;284:47-51.  
34  
35  
36  
37  
38 27. Kassem GA, Alzahrani AK. Maternal and neonatal outcomes of placenta previa  
39 and placenta accreta: three years of experience with a two-consultant approach.  
40 *Int J Womens Health.* 2013;28:803-10.  
41  
42  
43  
44  
45 28. Maher MA, Abdelaziz A, Bazeed MF. Diagnostic accuracy of ultrasound and MRI  
46 in the prenatal diagnosis of placenta accreta. *Acta Obstet Gynecol Scand.*  
47 2013;92:1017-22.  
48  
49  
50  
51 29. Alchalabi H, Lataifeh I, Obeidat B, Zayed F, Khader YS, Obeidat N. Morbidly  
52 adherent placenta previa in current practice: prediction and maternal morbidity in  
53  
54  
55  
56  
57  
58  
59  
60

- 1  
2  
3 a series of 23 women who underwent hysterectomy. *J Matern Fetal Neonatal*  
4  
5 *Med.* 2014;27:1734-7.  
6  
7  
8 30. Ascioglu O, Şahbaz A, Güngördük K, Yildirim G, Ascioglu BB, Ülker V. Maternal  
9  
10 and perinatal outcomes in women with placenta praevia and accreta in teaching  
11  
12 hospitals in Western Turkey. *J Obstet Gynaecol.* 2014;34:462-6.  
13  
14  
15 31. Sumigama S, Sugiyama C, Kotani T, Hayakawa H, Inoue A, Mano Y, et al.  
16  
17 Uterine sutures at prior caesarean section and placenta accreta in subsequent  
18  
19 pregnancy: a case-control study. *BJOG.* 2014;121:866-74;  
20  
21  
22 32. Ahmed SR, Aitallah A, Abdelghafar HM, Alsammani MA.  
23  
24 Major Placenta Previa: Rate, Maternal and Neonatal Outcomes Experience at  
25  
26 a Tertiary Maternity Hospital, Sohag, Egypt: A Prospective Study. *J Clin Diagn*  
27  
28 *Res.* 2015;9:17-9.  
29  
30  
31 33. Cheng KK, Lee MM. Rising incidence of morbidly adherent placenta and its  
32  
33 association with previous caesarean section: a 15-year analysis in a tertiary  
34  
35 hospital in Hong Kong. *Hong Kong Med J.* 2015;21:511-7.  
36  
37  
38 34. Cho HY, Hwang HS, Jung I, Park YW, Kwon JY, Kim YH. Diagnosis  
39  
40 of Placenta Accreta by Uterine Artery Doppler Velocimetry in Patients  
41  
42 With Placenta Previa. *J Ultrasound Med.* 2015;34:1571-5.  
43  
44  
45 35. Kollmann M, Gaulhofer J, Lang U, Klaritsch P. Placenta praevia: incidence, risk  
46  
47 factors and outcome. *J Matern Fetal Neonatal Med.* 2016;29:1395-8.  
48  
49  
50 36. Pilloni E, Alemanno MG, Gaglioti P, Sciarrone A, Garofalo A, Biolcati M, et al.  
51  
52 Accuracy of ultrasound in antenatal diagnosis of placental attachment disorders.  
53  
54 *Ultrasound Obstet Gynecol.* 2016;47:302-7.  
55  
56  
57  
58  
59  
60

- 1  
2  
3 37. Rezk MA, Shawky M. Grey-scale and colour Doppler ultrasound versus magnetic  
4 resonance imaging for the prenatal diagnosis of placenta accreta. *J Matern Fetal*  
5 *Neonatal Med.* 2016;29:218-23.  
6  
7  
8  
9  
10 38. Wortman AC, Schaefer SL, McIntire DD, Sheffield JS, Twickler DM.  
11 Complete Placenta Previa: Ultrasound Biometry and Surgical Outcomes. *AJP*  
12 *Rep.* 2018;8:e74-e78.  
13  
14  
15  
16  
17 39. Gottesfeld KR, Thompson HE, Holmes JH, Taylor ES. Ultrasonic  
18 placentography--a new method for placental localization. *Am J Obstet Gynecol.*  
19 1966;96:538-47.  
20  
21  
22  
23  
24 40. Kohorn EI, Walker RH, Morrison J, Campbell S. Placental localization. A  
25 comparison between ultrasonic compound B scanning and radioisotope  
26 scanning. *Am J Obstet Gynecol.* 1969;103:868-77.  
27  
28  
29  
30  
31 41. Ballas S, Gitstein S, Jaffa AJ, Peyser MR. Midtrimester placenta previa: normal or  
32 pathologic finding. *Obstet Gynecol.* 1979;54:12-4.  
33  
34  
35  
36 42. Leerentveld RA, Gilberts EC, Arnold MJ, Wladimiroff JW. Accuracy and safety of  
37 transvaginal sonographic placental localisation. *Obstet Gynecol* 1990;76:759-62.  
38  
39  
40 43. Smith RS, Lauria MR, Comstock CH, Treadwell MC, Kirk JS, Lee W, et al.  
41 Transvaginal ultrasonography for all placentas that appear to be low-lying or over  
42 the internal cervical os. *Ultrasound Obstet Gynecol* 1997;9:22-4.  
43  
44  
45  
46  
47 44. Dashe JS, McIntire DD, Ramus RM, Santos-Ramos R, Twickler DM. Persistence  
48 of placenta previa according to gestational age at ultrasound detection. *Obstet*  
49 *Gynecol* 2002;99:692-7.  
50  
51  
52  
53  
54  
55  
56  
57  
58  
59  
60



- 1  
2  
3 45. Quant HS, Friedman AM, Wang E, Parry S, Schwartz N. Transabdominal  
4  
5 ultrasonography as a screening test for second-trimester placenta previa. *Obstet*  
6  
7 *Gynecol.* 2014;123:628-33.  
8  
9
- 10 46. Reddy UM, Abuhamad AZ, Levine D, Saade GR; Fetal Imaging Workshop Invited  
11  
12 Participants. Fetal imaging: executive summary of a joint Eunice Kennedy Shriver  
13  
14 National Institute of Child Health and Human Development, Society for Maternal-  
15  
16 Fetal Medicine, American Institute of Ultrasound in Medicine, American College of  
17  
18 Obstetricians and Gynecologists, American College of Radiology, Society for  
19  
20 Pediatric Radiology, and Society of Radiologists in Ultrasound Fetal Imaging  
21  
22 Workshop. *J Ultrasound Med.* 2014;33:745-57.  
23  
24  
25
- 26 47. Jauniaux E, Collins SL, Jurkovic D, Burton GJ. Accreta placentation: a systematic  
27  
28 review of prenatal ultrasound imaging and grading of villous invasiveness. *Am J*  
29  
30 *Obstet Gynecol.* 2016;215:712-21.  
31  
32
- 33 48. Collins SL, Chantraine F, Morgan TK, Jauniaux E. Abnormally adherent and  
34  
35 invasive placenta: a spectrum disorder in need of a name. *Ultrasound Obstet*  
36  
37 *Gynecol.* 2018;51:165-6.  
38  
39
- 40 49. Collins SL, Ashcroft A, Braun T, Calda P, Langhoff-Ross J, Morel O et al.,  
41  
42 Proposed for standardized ultrasound descriptions of abnormally invasive placenta  
43  
44 (AIP). *Ultrasound Obstet Gynecol.* 2016;47:271-5.  
45  
46
- 47 50. Alfirevic Z, Tang A-W, Collins SL, Robson SC, Palacios-Jaraquemadas, on behalf  
48  
49 of the Ad-hoc International AIP Expert group. Pro forma for ultrasound reporting in  
50  
51 suspected abnormally invasive placenta (AIP); an international consensus.  
52  
53 *Ultrasound Obstet Gynecol.* 2016;47:276-8.  
54  
55  
56  
57  
58  
59  
60

- 1  
2  
3 51. Jauniaux E, Bhide A, Kennedy A, Woodward P, Hubinont C, Collins S; FIGO  
4 Placenta Accreta Diagnosis and Management Expert Consensus Panel. FIGO  
5 consensus guidelines on placenta accreta spectrum disorders: Prenatal diagnosis  
6 and screening. *Int J Gynaecol Obstet*. 2018;140:274-80.  
7  
8  
9  
10  
11  
12 52. Greenbaum S, Wainstock T, Dukler D, Leron E, Erez O. Underlying mechanisms  
13 of retained placenta: Evidence from a population based cohort study. *Eur J Obstet*  
14 *Gynecol Reprod Biol*. 2017;216:12-7.  
15  
16  
17  
18  
19 53. Obstetric Care Consensus No. 7 Summary: Placenta Accreta Spectrum. *Obstet*  
20 *Gynecol*. 2018;132:1519-21.  
21  
22  
23  
24 54. Bartels HC, Rogers AC, O'Brien D, McVey R, Walsh J, Brennan DJ. Association  
25 of Implementing a Multidisciplinary Team Approach in the Management of  
26 Morbidly Adherent Placenta With Maternal Morbidity and Mortality. *Obstet*  
27 *Gynecol*. 2018; doi: 10.1097/AOG.0000000000002865.  
28  
29  
30  
31  
32  
33 55. Wright JD, Silver RM, Bonanno C, Gaddipati S, Lu YS, Simpson LL, et al. Practice  
34 patterns and knowledge of obstetricians and gynecologists regarding placenta  
35 accreta. *J Matern Fetal Neonatal Med*. 2013;26:1602-9.  
36  
37  
38  
39  
40 56. Cal M, Ayres-de-Campos D, Jauniaux E. International survey of practices used in  
41 the diagnosis and management of placenta accreta spectrum disorders. *Int J*  
42 *Gynaecol Obstet*. 2018;140:307-11.  
43  
44  
45  
46  
47 57. Allen L, Jauniaux E, Hobson S, Papillon-Smith J, Belfort MA; FIGO Placenta  
48 Accreta Diagnosis and Management Expert Consensus Panel. FIGO consensus  
49 guidelines on placenta accreta spectrum disorders: Nonconservative surgical  
50 management. *Int J Gynaecol Obstet*. 2018;140:281-290.  
51  
52  
53  
54  
55  
56  
57  
58  
59  
60

- 1  
2  
3 58. Farquhar CM, Li Z, Lensen S, McLintock C, Pollock W, Peek MJ et al. Incidence,  
4 risk factors and perinatal outcomes for placenta accreta in Australia and New  
5 Zealand: a case-control study. *BMJ Open*. 2017;7:e017713.  
6  
7  
8  
9  
10 59. Sargent W, Collins SL. Are women antenatally diagnosed with abnormally  
11 invasive placenta receiving optimal management in England? An observational  
12 study of planned place of delivery. *Acta Obstet Gynecol Scand*. 2019;98:337-  
13 341.  
14  
15  
16  
17  
18  
19 60. Cresswell JA, Ronsmans C, Calvert C, Filippi V. Prevalence of placenta praevia  
20 by world region: a systematic review and meta-analysis. *Trop Med Int*  
21 *Health*. 2013;18:712-24.  
22  
23  
24  
25  
26  
27  
28  
29  
30  
31  
32  
33  
34  
35  
36  
37  
38  
39  
40  
41  
42  
43  
44  
45  
46  
47  
48  
49  
50  
51  
52  
53  
54  
55  
56  
57  
58  
59  
60

**Table 1:** Prevalence of placenta previa with placenta accreta spectrum (PAS) per pregnancies or births in the corresponding obstetric population and incidence of PAS per cohorts of placenta previa.

|                                          | <b>Obstetric population</b> | <b>Prevalence (%)</b> | <b>Incidence (%)</b> |
|------------------------------------------|-----------------------------|-----------------------|----------------------|
| Chattopadhyay et al., 1993 <sup>19</sup> | 41,206 births               | 26 (0.063)            | 26/222 (11.7)        |
| Zaki et al., 1998 <sup>20</sup>          | 23,070 births               | 12 (0.052)            | 12/110 (10.9)        |
| Ziadeh et al., 1999 <sup>21</sup>        | 18,651 births               | 13 (0.070)            | 13/65 (20.0)         |
| Gourab et al., 2001 <sup>22</sup>        | 18,670 births               | 11 (0.059)            | 11/138 (8.0)         |
| Bahar et al., 2009 <sup>23</sup>         | 42,487 births               | 53 (0.125)            | 53/306 (17.3)        |
| Hamada et al., 2011 <sup>24</sup>        | 2,413 births                | 5 (0.207)             | 5/70 (7.1)           |
| Jang et al., 2011 <sup>25</sup>          | 35,030 births               | 53 (0.151)            | 53/560 (9.5)         |
| Rosenberg et al., 2011 <sup>26</sup>     | 185,476 births              | 23 (0.012)            | 23/779 (3.0)         |
| Kassem et al., 2013 <sup>27</sup>        | 29,053 births               | 25 (0.085)            | 25/122 (20.5)        |
| Maher et al., 2013 <sup>28</sup>         | 24,661 births               | 42 (0.170)            | 42/577 (7.3)         |
| Alchalabi et al., 2014 <sup>29</sup>     | 16,845 births               | 23 (0.137)            | 23/81 (28.4)         |
| Ascioglu et al., 2014 <sup>30</sup>      | 112,819 births              | 46 (0.041)            | 46/364 (12.6)        |
| Sumigama et al., 2014 <sup>31</sup>      | 96,670 births               | 46 (0.048)            | 46/954 (4.8)         |
| Ahmed et al., 2015 <sup>32</sup>         | 3,841 births                | 14 (0.365)            | 14/52 26.9           |
| Cheng et al., 2015 <sup>33</sup>         | 81,497 births               | 39 (0.048)            | 39/921 (4.2)         |
| Cho et al., 2015 <sup>34</sup>           | 11,210 pregnancies          | 39 (0.348)            | 39/442 (8.8)         |
| Kollmann et al., 2016 <sup>35</sup>      | 218,876 births              | 13 (0.006)            | 13/328 (4.0)         |
| Pilloni et al., 2016 <sup>36</sup>       | 108,000 births              | 37 (0.034)            | 37/314 (11.8)        |
| Rezk et al., 2016 <sup>37</sup>          | 12,654 pregnancies          | 53 (0.419)            | 53/74 (71.6)         |
| Wortman et al., 2018 <sup>38</sup>       | 148,031 births              | 14 (0.010)            | 14/157 (8.9)         |

**Table 2:** Studies presenting detailed histopathologic data on the depth of villous invasiveness (PAS grades).

| Author/Year                        | No of cases<br>Analysed/ No<br>of cases included<br>in the study | PAS grades             |                       |                       |
|------------------------------------|------------------------------------------------------------------|------------------------|-----------------------|-----------------------|
|                                    |                                                                  | PC<br>(%)              | PI<br>(%)             | PP<br>(%)             |
| Hamada et al, 2011 <sup>24</sup>   | 5/5                                                              | 3<br>(60.0%)           | 2<br>(40.0%)          | --                    |
| Kassem et al, 2013 <sup>27</sup>   | 19/25                                                            | 13<br>(68.4%)          | 5<br>(26.3%)          | 1<br>(5.3%)           |
| Maher et al, 2013 <sup>28</sup>    | 42/42                                                            | 28<br>(66.6%)          | 13<br>(31.0%)         | 1<br>(2.4%)           |
| Achalabi et al, 2014 <sup>29</sup> | 23/23                                                            | 15<br>(65.2%)          | 4<br>(17.4%)          | 4<br>(17.4%)          |
| Sumigama et al, 2014 <sup>31</sup> | 46/46                                                            | 14<br>(30.4%)          | 21<br>(45.7%)         | 11<br>(23.9%)         |
| Cheng et al, 2015 <sup>33</sup>    | 39/39                                                            | 36<br>(92.3%)          | --                    | 3<br>(7.7%)           |
| Cho et al, 2015 <sup>34</sup>      | 39/39                                                            | 24<br>(37.4)           | 11<br>(31.3%)         | 4<br>(31.3%)          |
| Pilloni et al, 2016 <sup>36</sup>  | 17/37                                                            | 7<br>(41.2%)           | 4<br>(23.5%)          | 6<br>(35.3%)          |
| Rezk et al, 2016 <sup>37</sup>     | 53/53                                                            | 31<br>(58.5%)          | 14<br>(26.4%)         | 8<br>(15.1%)          |
| <b>Total</b>                       | <b>283/309</b>                                                   | <b>171<br/>(60.4%)</b> | <b>74<br/>(26.2%)</b> | <b>38<br/>(13.4%)</b> |

PAS= placenta accreta spectrum

## Figure legends

**Fig 1:** Flow diagram showing the selection of reports included in the review.

**Fig 2:** Forest plots showing the heterogeneity of prevalence data in prospective and retrospective cohort studies of women presenting with a placenta previa. Only first author's name is given for each reference. *ES, effect size. CI, confidence interval*

**Fig 3:** Forest plots showing heterogeneity in the prevalence data for prospective and retrospective cohort studies of women diagnosed with placenta previa accreta. Only first author's name is given for each reference. *ES, effect size. CI, confidence interval*

**Fig 4:** Forest plots showing the heterogeneity in cohort studies reporting incidence data for women diagnosed with placenta previa major and PAS and those with either placenta previa minor or major and PAS. *ES, effect size. CI, confidence interval*



1  
2  
3  
4  
5  
6  
7  
8  
9  
10  
11  
12  
13  
14  
15  
16  
17  
18  
19  
20  
21  
22  
23  
24  
25  
26  
27  
28  
29  
30  
31  
32  
33  
34  
35  
36  
37  
38  
39  
40  
41

Author (year)

ES (95% CI)

Weight %

**Retrospective**

|                                                    |                         |              |
|----------------------------------------------------|-------------------------|--------------|
| Alchalabi (2014)                                   | 0.48 (0.39;0.60)        | 5.24         |
| Ascioglu (2014)                                    | 0.32 (0.29;0.36)        | 5.38         |
| Bahar (2009)                                       | 0.72 (0.64;0.81)        | 5.30         |
| Cheng (2015)                                       | 1.13 (1.06;1.21)        | 5.32         |
| Cho (2015)                                         | 3.94 (3.60;4.32)        | 3.96         |
| Hamada (2011)                                      | 2.90 (2.30;3.65)        | 2.40         |
| Jang (2011)                                        | 1.60 (1.47;1.74)        | 5.15         |
| Kassem (2013)                                      | 0.42 (0.35;0.50)        | 5.31         |
| Kollmann (2016)                                    | 0.15 (0.13;0.17)        | 5.39         |
| Rosenberg (2011)                                   | 0.42 (0.39;0.45)        | 5.38         |
| Sumigama (2014)                                    | 0.99 (0.93;1.05)        | 5.34         |
| Wortman (2018)                                     | 0.11 (0.10;0.13)        | 5.39         |
| Zaki (1998)                                        | 0.48 (0.40;0.57)        | 5.28         |
| <i>Subtotal (I<sup>2</sup>= 99.55%; P&lt;.001)</i> | <i>0.90 (0.73;1.08)</i> | <i>64.84</i> |

**Prospective**

|                                                    |                         |              |
|----------------------------------------------------|-------------------------|--------------|
| Ahmed (2015)                                       | 1.35 (1.03;1.77)        | 3.93         |
| Chattopadhyay (1993)                               | 0.54 (0.47;0.61)        | 5.32         |
| Gourab (2001)                                      | 0.74 (0.63;0.87)        | 5.18         |
| Maher (2013)                                       | 2.34 (2.16;2.54)        | 4.91         |
| Pilloni (2016)                                     | 0.29 (0.26;0.32)        | 5.38         |
| Rezk (2016)                                        | 0.58 (0.47;0.73)        | 5.14         |
| Ziadeh (1999)                                      | 0.35 (0.27;0.44)        | 5.29         |
| <i>Subtotal (I<sup>2</sup>= 98.87%; P&lt;.001)</i> | <i>0.87 (0.55;1.18)</i> | <i>35.16</i> |

Heterogeneity between groups: P=.839

Overall (I<sup>2</sup>= 99.43%; P<.001) 0.89 (0.75;1.02) 100.00

-2

0

For peer review only - <http://bmjopen.bmj.com/site/about/guidelines.xhtml>

2

4

6



1  
2  
3  
4  
5  
6  
7  
8  
9  
10  
11  
12  
13  
14  
15  
16  
17  
18  
19  
20  
21  
22  
23  
24  
25  
26  
27  
28  
29  
30  
31  
32  
33  
34  
35  
36  
37  
38  
39  
40  
41

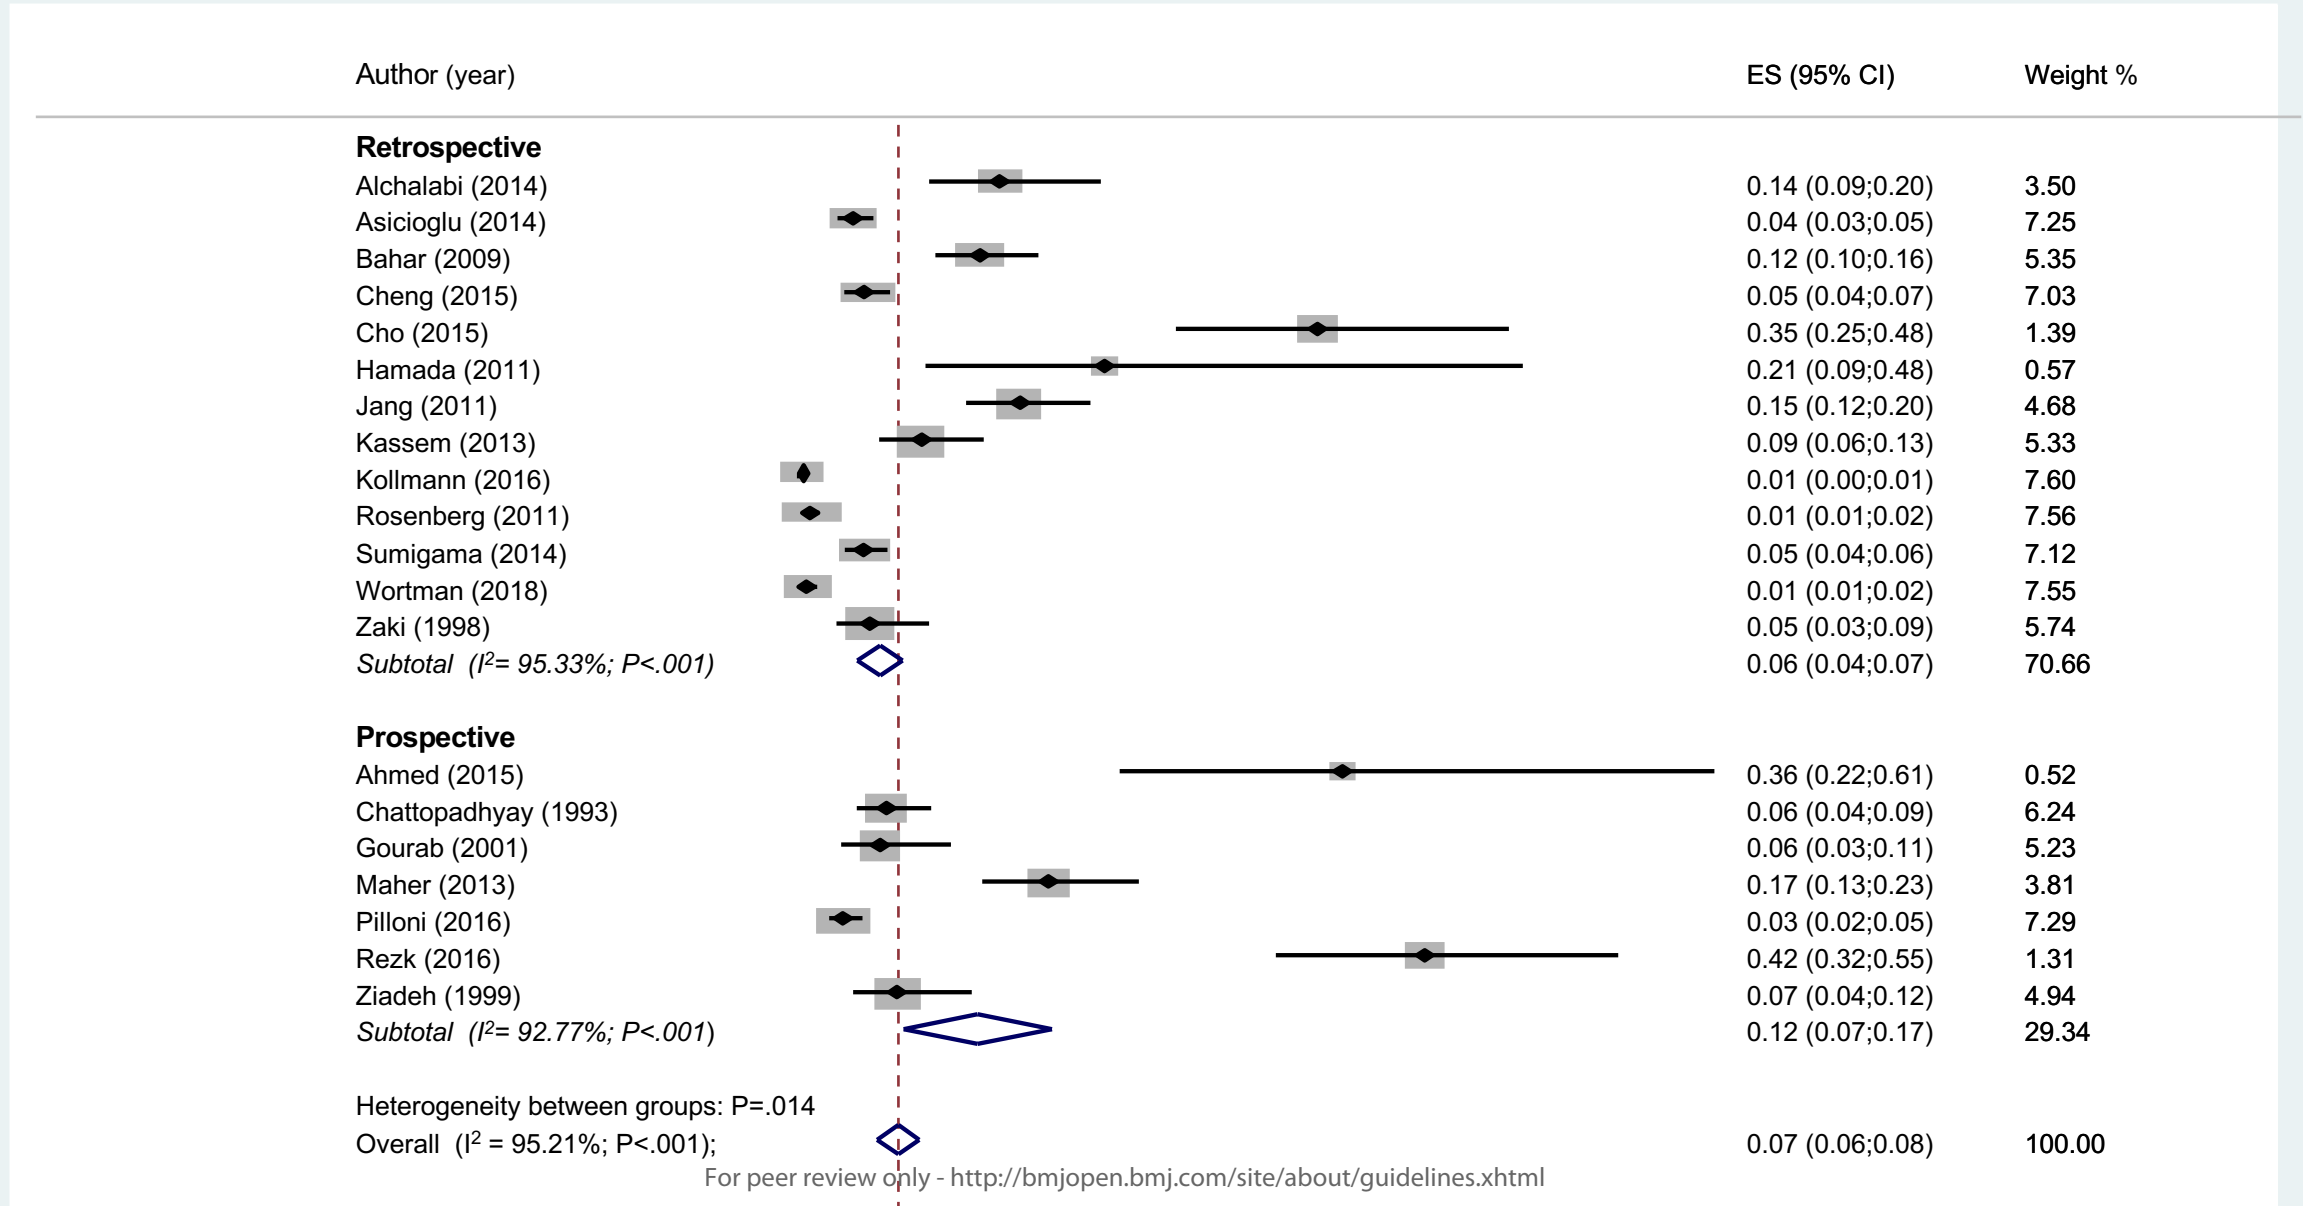

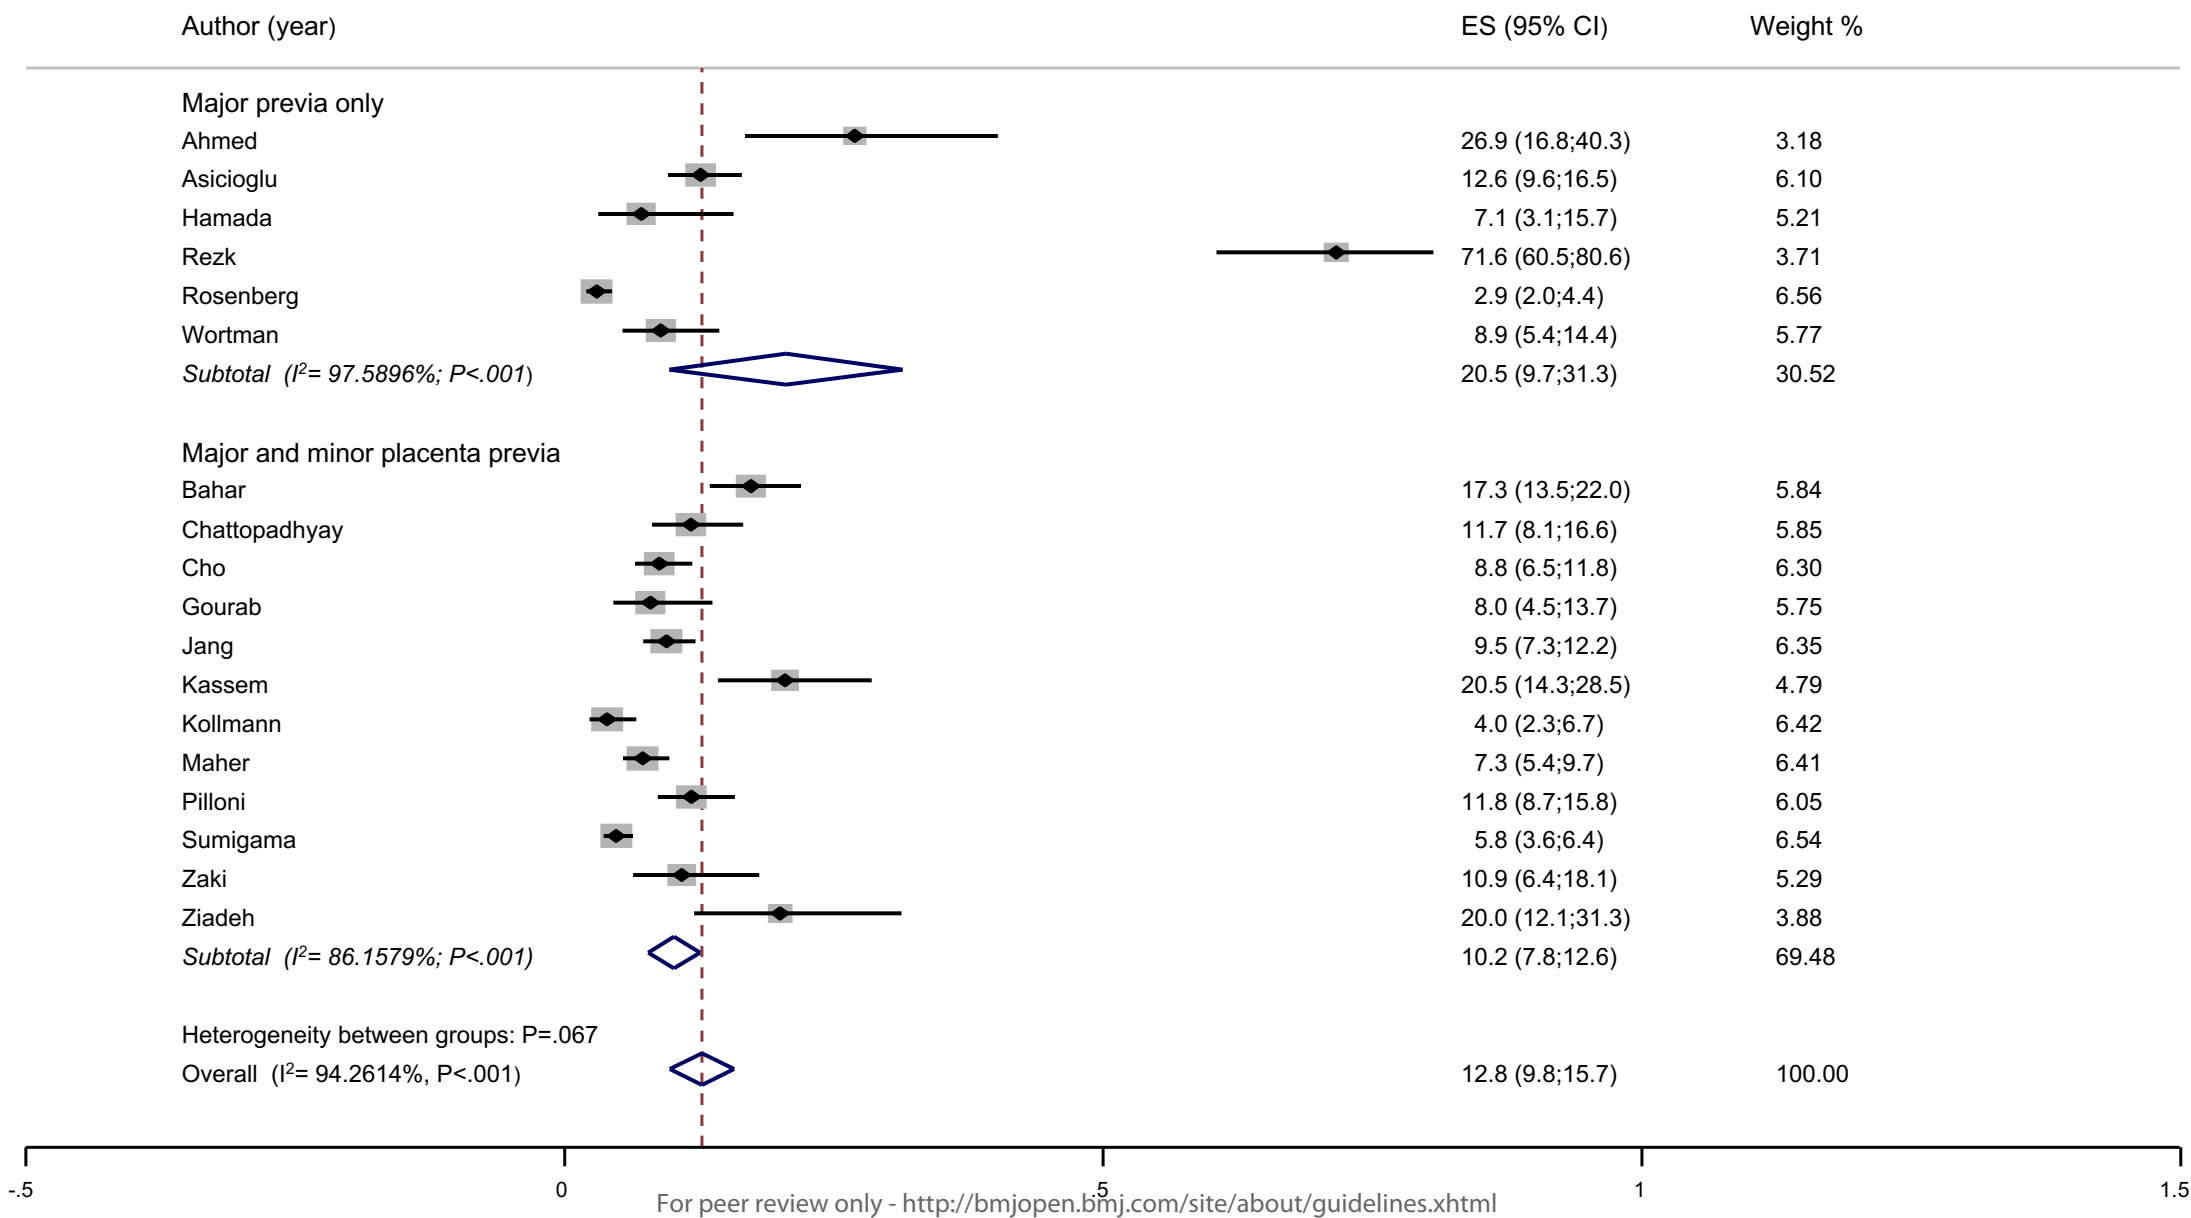

### Supplementary data 1: Search strategy for PubMed

(placenta accreta\*.tw OR placenta increta\*.tw OR placenta percreta\*.tw OR abnormally invasive placenta\*.tw OR morbidly adherent placenta\*.tw)

AND

(placenta previa\*.tw OR major placenta previa\*.tw OR minor placenta previa\*.tw OR low-lying placenta\*.tw)

AND

(prevalence\*.tw OR incidence\*.tw OR obstetric hysterectomy\*.tw OR caesarean hysterectomy\*.tw OR maternal mortality\*.tw OR)

The search was limited to articles published in English.

For peer review only

## Supplementary Data 2 Electronic search strategy

**Time period:** August 1982 and September 2018

### **Inclusion Criteria**

- Cohort studies involving women presenting with a singleton pregnancy and placenta previa complicated by accreta placentation diagnosed during the second half of pregnancy and/or at birth.
- Original publication with data on the number of pregnancies, births and/or deliveries in the corresponding population.

### **Exclusion Criteria**

- Reviews, opinions, letters, protocols and conference proceedings.
- Case series and cohorts of less than 50 cases of placenta previa.
- Articles published before 1982.
- Articles in languages other than English.
- Non-human studies.

**Supplementary data 3:** Characteristics and quality assessment of the 20 studies included in the review.

|                                          | Country      | Dates     | Study type                                     | Risk of bias |               |         | Overall |
|------------------------------------------|--------------|-----------|------------------------------------------------|--------------|---------------|---------|---------|
|                                          |              |           |                                                | Selection    | Comparability | Outcome |         |
| Chattopadhyay et al., 1993 <sup>19</sup> | Saudi Arabia | 1988-1992 | Retrospective/ Single Institution              | ⊗⊗           | ⊗             | ⊗⊗      | Medium  |
| Zaki et al., 1998 <sup>20</sup>          | Saudi Arabia | 1990-1996 | Retrospective/ Single Institution              | ⊗⊗           | ⊗             | ⊗       | High    |
| Ziadeh et al., 1999 <sup>21</sup>        | Jordan       | 1995-1996 | Prospective/ Single Institution                | ⊗⊗⊗          | ⊗             | ⊗⊗      | Medium  |
| Gourab et al., 2001 <sup>22</sup>        | Saudi Arabia | 1995-2000 | Prospective/ Single Institution                | ⊗⊗⊗          | ⊗             | ⊗⊗      | Medium  |
| Bahar et al., 2009 <sup>23</sup>         | Saudi Arabia | 1996-2005 | Retrospective/ Single Institution              | ⊗⊗           | ⊗             | ⊗⊗      | Medium  |
| Hamada et al., 2011 <sup>24</sup>        | Japan        | 2007-2009 | Prospective/ Single Institution <sup>¶</sup>   | ⊗⊗⊗⊗         | ⊗⊗            | ⊗⊗⊗     | Low     |
| Jang et al., 2011 <sup>25</sup>          | South Korea  | 1999-2009 | Retrospective/ 3 Institutions                  | ⊗⊗           | ⊗             | ⊗⊗      | Medium  |
| Rosenberg et al., 2011 <sup>26</sup>     | Israel       | 1988-2009 | Retrospective/ Region <sup>¶</sup>             | ⊗⊗           | ⊗             | ⊗⊗      | Medium  |
| Kassem et al., 2013 <sup>27</sup>        | Saudi Arabia | 2009-2012 | Retrospective/ Single Institution              | ⊗⊗⊗          | ⊗             | ⊗⊗      | Medium  |
| Maher et al., 2013 <sup>28</sup>         | Egypt        | 2008-2011 | Prospective/ Single Institution                | ⊗⊗⊗⊗         | ⊗⊗            | ⊗⊗⊗     | Low     |
| Alchalabi et al., 2014 <sup>29</sup>     | Jordan       | 2003-2012 | Retrospective/ Single Institution*             | ⊗⊗           | ⊗             | ⊗⊗      | Medium  |
| Ascioglu et al., 2014 <sup>30</sup>      | Turkey       | 2005-2010 | Retrospective/ Single Institution <sup>¶</sup> | ⊗⊗⊗⊗         | ⊗⊗            | ⊗⊗⊗     | Low     |
| Sumigama et al., 2014 <sup>31</sup>      | Japan        | 1994-2012 | Retrospective/ 11 Institutions <sup>¶</sup>    | ⊗⊗⊗⊗         | ⊗⊗            | ⊗⊗⊗     | Low     |
| Ahmed et al., 2015 <sup>32</sup>         | Egypt        | 2014      | Prospective/ Single Institution <sup>¶</sup>   | ⊗⊗           | ⊗             | ⊗       | High    |
| Cheng et al., 2015 <sup>33</sup>         | China        | 1999-2013 | Retrospective/ Single Institution*             | ⊗⊗⊗⊗         | ⊗⊗            | ⊗⊗⊗     | Low     |
| Cho et al., 2015 <sup>34</sup>           | South-Korea  | 1991-2013 | Retrospective/ Single Institution              | ⊗⊗           | ⊗             | ⊗⊗      | Medium  |
| Kollmann et al., 2016 <sup>35</sup>      | Austria      | 1993-2012 | Retrospective/ Region                          | ⊗⊗⊗⊗         | ⊗⊗            | ⊗⊗⊗     | Low     |
| Pilloni et al., 2016 <sup>36</sup>       | Italy        | 2011-2014 | Prospective/ Region                            | ⊗⊗⊗⊗         | ⊗⊗            | ⊗⊗⊗     | Low     |
| Rezk et al., 2016 <sup>37</sup>          | Egypt        | 2012-2014 | Prospective/ Single Institution <sup>¶</sup>   | ⊗⊗⊗⊗         | ⊗⊗            | ⊗⊗⊗     | Low     |
| Wortman et al., 2018 <sup>38</sup>       | US           | 2002-2011 | Retrospective/ Single Institution <sup>¶</sup> | ⊗⊗           | ⊗             | ⊗⊗      | Medium  |

¶= Studies including major placenta previa only; \* Studies with no description of the ultrasound diagnostic signs for PAS.

## MOOSE (Meta-analyses Of Observational Studies in Epidemiology) Checklist

A reporting checklist for Authors, Editors, and Reviewers of Meta-analyses of Observational Studies. You must report the page number in your manuscript where you consider each of the items listed in this checklist. If you have not included this information, either revise your manuscript accordingly before submitting or note N/A.

| Reporting Criteria                                                                                              | Reported (Yes/No) | Reported on Page No. |
|-----------------------------------------------------------------------------------------------------------------|-------------------|----------------------|
| <b>Reporting of Background</b>                                                                                  |                   |                      |
| Problem definition                                                                                              |                   |                      |
| Hypothesis statement                                                                                            |                   |                      |
| Description of Study Outcome(s)                                                                                 |                   |                      |
| Type of exposure or intervention used                                                                           |                   |                      |
| Type of study design used                                                                                       |                   |                      |
| Study population                                                                                                |                   |                      |
| <b>Reporting of Search Strategy</b>                                                                             |                   |                      |
| Qualifications of searchers (eg, librarians and investigators)                                                  |                   |                      |
| Search strategy, including time period included in the synthesis and keywords                                   |                   |                      |
| Effort to include all available studies, including contact with authors                                         |                   |                      |
| Databases and registries searched                                                                               |                   |                      |
| Search software used, name and version, including special features used (eg, explosion)                         |                   |                      |
| Use of hand searching (eg, reference lists of obtained articles)                                                |                   |                      |
| List of citations located and those excluded, including justification                                           |                   |                      |
| Method for addressing articles published in languages other than English                                        |                   |                      |
| Method of handling abstracts and unpublished studies                                                            |                   |                      |
| Description of any contact with authors                                                                         |                   |                      |
| <b>Reporting of Methods</b>                                                                                     |                   |                      |
| Description of relevance or appropriateness of studies assembled for assessing the hypothesis to be tested      |                   |                      |
| Rationale for the selection and coding of data (eg, sound clinical principles or convenience)                   |                   |                      |
| Documentation of how data were classified and coded (eg, multiple raters, blinding, and interrater reliability) |                   |                      |
| Assessment of confounding (eg, comparability of cases and controls in studies where appropriate)                |                   |                      |

| Reporting Criteria                                                                                                                                                                                                                                                           | Reported (Yes/No) | Reported on Page No. |
|------------------------------------------------------------------------------------------------------------------------------------------------------------------------------------------------------------------------------------------------------------------------------|-------------------|----------------------|
| Assessment of study quality, including blinding of quality assessors; stratification or regression on possible predictors of study results                                                                                                                                   |                   |                      |
| Assessment of heterogeneity                                                                                                                                                                                                                                                  |                   |                      |
| Description of statistical methods (eg, complete description of fixed or random effects models, justification of whether the chosen models account for predictors of study results, dose-response models, or cumulative meta-analysis) in sufficient detail to be replicated |                   |                      |
| Provision of appropriate tables and graphics                                                                                                                                                                                                                                 |                   |                      |
| <b>Reporting of Results</b>                                                                                                                                                                                                                                                  |                   |                      |
| Table giving descriptive information for each study included                                                                                                                                                                                                                 |                   |                      |
| Results of sensitivity testing (eg, subgroup analysis)                                                                                                                                                                                                                       |                   |                      |
| Indication of statistical uncertainty of findings                                                                                                                                                                                                                            |                   |                      |
| <b>Reporting of Discussion</b>                                                                                                                                                                                                                                               |                   |                      |
| Quantitative assessment of bias (eg, publication bias)                                                                                                                                                                                                                       |                   |                      |
| Justification for exclusion (eg, exclusion of non-English-language citations)                                                                                                                                                                                                |                   |                      |
| Assessment of quality of included studies                                                                                                                                                                                                                                    |                   |                      |
| <b>Reporting of Conclusions</b>                                                                                                                                                                                                                                              |                   |                      |
| Consideration of alternative explanations for observed results                                                                                                                                                                                                               |                   |                      |
| Generalization of the conclusions (ie, appropriate for the data presented and within the domain of the literature review)                                                                                                                                                    |                   |                      |
| Guidelines for future research                                                                                                                                                                                                                                               |                   |                      |
| Disclosure of funding source                                                                                                                                                                                                                                                 |                   |                      |

Once you have completed this checklist, please save a copy and upload it as part of your submission. DO NOT include this checklist as part of the main manuscript document. It must be uploaded as a separate file.
