# Supplementary material for: Epidemiology of placenta previa accreta: a systematic review and meta-analysis
Source: PubMed Central journal article supplement — BMJ Open. 2019 Nov 12;9(11):e031193. doi: 10.1136/bmjopen-2019-031193 (PMC6858111; doi:10.1136/bmjopen-2019-031193), 2019-11-12
Supplement: bmjopen-2019-031193supp001.pdf [file bmjopen-2019-031193supp001.pdf]

**Supplementary data 1: Search strategy for PubMed**

(placenta accreta\*.tw OR placenta increta\*.tw OR placenta percreta\*.tw OR abnormally invasive placenta\*.tw OR morbidly adherent placenta\*.tw)

AND

(placenta previa\*.tw OR major placenta previa\*.tw OR minor placenta previa\*.tw OR low-lying placenta\*.tw)

AND

(prevalence\*.tw OR incidence\*.tw OR obstetric hysterectomy\*.tw OR caesarean hysterectomy\*.tw OR maternal mortality\*.tw OR)

The search was limited to articles published in English.
