# Supplementary material for: Epidemiology of placenta previa accreta: a systematic review and meta-analysis
Source: PubMed Central journal article supplement — BMJ Open. 2019 Nov 12;9(11):e031193. doi: 10.1136/bmjopen-2019-031193 (PMC6858111; doi:10.1136/bmjopen-2019-031193), 2019-11-12
Supplement: bmjopen-2019-031193supp002.pdf [file bmjopen-2019-031193supp002.pdf]

## Supplementary Data 2 Electronic search strategy

**Time period:** August 1982 and September 2018

### **Inclusion Criteria**

- Cohort studies involving women presenting with a singleton pregnancy and placenta previa complicated by accreta placentation diagnosed during the second half of pregnancy and/or at birth.
- Original publication with data on the number of pregnancies, births and/or deliveries in the corresponding population.

### **Exclusion Criteria**

- Reviews, opinions, letters, protocols and conference proceedings.
- Case series and cohorts of less than 50 cases of placenta previa.
- Articles published before 1982.
- Articles in languages other than English.
- Non-human studies.
