# Supplementary material for: Epidemiology of placenta previa accreta: a systematic review and meta-analysis
Source: PubMed Central journal article supplement — BMJ Open. 2019 Nov 12;9(11):e031193. doi: 10.1136/bmjopen-2019-031193 (PMC6858111; doi:10.1136/bmjopen-2019-031193), 2019-11-12
Supplement: bmjopen-2019-031193supp003.pdf [file bmjopen-2019-031193supp003.pdf]

**Supplementary data 3:** Characteristics and quality assessment of the 20 studies included in the review.

|                                          | Country      | Dates     | Study type                                     | Risk of bias Categories |               |     | Overall Outcome |
|------------------------------------------|--------------|-----------|------------------------------------------------|-------------------------|---------------|-----|-----------------|
|                                          |              |           |                                                | Selection               | Comparability |     |                 |
| Chattopadhyay et al., 1993 <sup>19</sup> | Saudi Arabia | 1988-1992 | Retrospective/ Single Institution              | ⊗⊗                      | ⊗             | ⊗⊗  | Medium          |
| Zaki et al., 1998 <sup>20</sup>          | Saudi Arabia | 1990-1996 | Retrospective/ Single Institution              | ⊗⊗                      | ⊗             | ⊗   | High            |
| Ziadeh et al., 1999 <sup>21</sup>        | Jordan       | 1995-1996 | Prospective/ Single Institution                | ⊗⊗⊗                     | ⊗             | ⊗⊗  | Medium          |
| Gourab et al., 2001 <sup>22</sup>        | Saudi Arabia | 1995-2000 | Prospective/ Single Institution                | ⊗⊗⊗                     | ⊗             | ⊗⊗  | Medium          |
| Bahar et al., 2009 <sup>23</sup>         | Saudi Arabia | 1996-2005 | Retrospective/ Single Institution              | ⊗⊗                      | ⊗             | ⊗⊗  | Medium          |
| Hamada et al., 2011 <sup>24</sup>        | Japan        | 2007-2009 | Prospective/ Single Institution <sup>¶</sup>   | ⊗⊗⊗⊗                    | ⊗⊗            | ⊗⊗⊗ | Low             |
| Jang et al., 2011 <sup>25</sup>          | South Korea  | 1999-2009 | Retrospective/ 3 Institutions                  | ⊗⊗                      | ⊗             | ⊗⊗  | Medium          |
| Rosenberg et al., 2011 <sup>26</sup>     | Israel       | 1988-2009 | Retrospective/ Region <sup>¶</sup>             | ⊗⊗                      | ⊗             | ⊗⊗  | Medium          |
| Kassem et al., 2013 <sup>27</sup>        | Saudi Arabia | 2009-2012 | Retrospective/ Single Institution              | ⊗⊗⊗                     | ⊗             | ⊗⊗  | Medium          |
| Maher et al., 2013 <sup>28</sup>         | Egypt        | 2008-2011 | Prospective/ Single Institution                | ⊗⊗⊗⊗                    | ⊗⊗            | ⊗⊗⊗ | Low             |
| Alchalabi et al., 2014 <sup>29</sup>     | Jordan       | 2003-2012 | Retrospective/ Single Institution*             | ⊗⊗                      | ⊗             | ⊗⊗  | Medium          |
| Asicioglu et al., 2014 <sup>30</sup>     | Turkey       | 2005-2010 | Retrospective/ Single Institution <sup>¶</sup> | ⊗⊗⊗⊗                    | ⊗⊗            | ⊗⊗⊗ | Low             |
| Sumigama et al., 2014 <sup>31</sup>      | Japan        | 1994-2012 | Retrospective/ 11 Institutions <sup>¶</sup>    | ⊗⊗⊗⊗                    | ⊗⊗            | ⊗⊗⊗ | Low             |
| Ahmed et al., 2015 <sup>32</sup>         | Egypt        | 2014      | Prospective/ Single Institution <sup>¶</sup>   | ⊗⊗                      | ⊗             | ⊗   | High            |
| Cheng et al., 2015 <sup>33</sup>         | China        | 1999-2013 | Retrospective/ Single Institution*             | ⊗⊗⊗⊗                    | ⊗⊗            | ⊗⊗⊗ | Low             |
| Cho et al., 2015 <sup>34</sup>           | South-Korea  | 1991-2013 | Retrospective/ Single Institution              | ⊗⊗                      | ⊗             | ⊗⊗  | Medium          |
| Kollmann et al., 2016 <sup>35</sup>      | Austria      | 1993-2012 | Retrospective/ Region                          | ⊗⊗⊗⊗                    | ⊗⊗            | ⊗⊗⊗ | Low             |
| Pilloni et al., 2016 <sup>36</sup>       | Italy        | 2011-2014 | Prospective/ Region                            | ⊗⊗⊗⊗                    | ⊗⊗            | ⊗⊗⊗ | Low             |
| Rezk et al., 2016 <sup>37</sup>          | Egypt        | 2012-2014 | Prospective/ Single Institution <sup>¶</sup>   | ⊗⊗⊗⊗                    | ⊗⊗            | ⊗⊗⊗ | Low             |
| Wortman et al., 2018 <sup>38</sup>       | US           | 2002-2011 | Retrospective/ Single Institution <sup>¶</sup> | ⊗⊗                      | ⊗             | ⊗⊗  | Medium          |

¶= Studies including major placenta previa only; \* Studies with no description of the ultrasound diagnostic signs for PAS.
